# Supplementary material for: Identification and Validation of an Immunological Expression-Based Prognostic Signature in Breast Cancer
Source: Front Genet. 2020 Sep 16;11:912. doi: 10.3389/fgene.2020.00912 (PMC7526716; doi:10.3389/fgene.2020.00912)
Supplement: Supplementary file 6 [file Data_Sheet_1.XLS]

gene	conMean	treatMean	logFC	pValue	fdr	up/ down
CSAG1	0.002514184	1.29074721	9.003900335	1.65E-23	6.24E-23	up regulation
MUC2	0.009547877	3.885908173	8.668856054	2.13E-15	5.31E-15	up regulation
CGA	0.028619446	11.13799563	8.60427817	1.47E-18	4.36E-18	up regulation
RN7SL3	0.207995829	79.72729776	8.582375363	2.24E-14	5.31E-14	up regulation
CST4	0.021870724	7.84974664	8.487501272	2.96E-44	3.85E-43	up regulation
MAGEA1	0.005342618	1.402507268	8.036245636	3.41E-10	6.48E-10	up regulation
CST5	0.069540528	17.01879386	7.935059064	1.20E-16	3.20E-16	up regulation
ACTL8	0.012720388	3.067543732	7.913797389	4.63E-30	2.48E-29	up regulation
IBSP	0.016950718	3.811182093	7.812748335	2.04E-61	3.26E-59	up regulation
SPDYC	0.042786914	6.484071534	7.243586554	3.95E-10	7.47E-10	up regulation
COL10A1	0.326859929	42.91205648	7.036566707	2.43E-65	3.00E-62	up regulation
SIRLNT	0.032898504	3.838344828	6.866318549	2.41E-09	4.37E-09	up regulation
CST1	0.139370432	15.78413295	6.823406679	2.18E-51	5.41E-50	up regulation
CHRNA9	0.022699155	2.534479609	6.802907144	2.27E-23	8.53E-23	up regulation
AC044784.1	0.144946694	14.4947836	6.643867555	3.88E-23	1.44E-22	up regulation
CASP14	0.118109244	11.80877844	6.643594041	5.17E-06	7.71E-06	up regulation
PRAC2	0.006685994	0.593019504	6.470793687	4.39E-16	1.13E-15	up regulation
CPLX2	0.015462611	1.363360948	6.462239796	0.031720178	0.035850359	up regulation
MMP1	0.214399193	18.48646038	6.430025729	3.75E-51	9.12E-50	up regulation
PCSK1	0.140829513	11.96059807	6.408196015	0.001650624	0.002073152	up regulation
TRPA1	0.032821015	2.721947967	6.37387584	1.11E-22	4.04E-22	up regulation
RTBDN	0.01107258	0.884083593	6.319119527	1.36E-33	8.96E-33	up regulation
RNVU1-7	0.11035486	8.683935173	6.298126886	0.01145647	0.013422133	up regulation
SNORA73B	1.372319824	104.7060786	6.253584643	9.41E-11	1.84E-10	up regulation
MED15P4	0.019107531	1.442709038	6.238495224	4.42E-12	9.26E-12	up regulation
MMP11	0.859425504	62.68680407	6.188645379	3.19E-67	1.48E-63	up regulation
DSCR8	0.006045971	0.439369639	6.183317322	3.01E-14	7.08E-14	up regulation
SNORA23	0.182566239	13.12564874	6.16782492	0.021615235	0.024775701	up regulation
CBLN2	0.044950816	3.090143757	6.103182841	1.28E-09	2.35E-09	up regulation
MMP13	0.171151094	11.60164102	6.08291456	2.76E-57	1.42E-55	up regulation
COL11A1	0.411162925	27.39719728	6.058174323	1.83E-57	9.85E-56	up regulation
HNRNPA1P57	0.053250563	3.412001144	6.001677531	2.68E-14	6.32E-14	up regulation
C5orf66-AS1	0.01471273	0.936413024	5.992008152	4.51E-32	2.71E-31	up regulation
ORM1	0.167424191	10.54231013	5.97653923	1.09E-11	2.24E-11	up regulation
LHX1	0.003616258	0.225448197	5.96215467	1.54E-10	2.97E-10	up regulation
EPYC	0.038634903	2.371059458	5.939483273	1.32E-48	2.49E-47	up regulation
NSG2	0.025318173	1.526350383	5.913769052	7.54E-27	3.39E-26	up regulation
HIST1H2BM	0.009211731	0.534143279	5.857610723	1.04E-20	3.43E-20	up regulation
SCARNA21	0.26156885	15.10844727	5.852020844	5.11E-05	7.12E-05	up regulation
GABRQ	0.013161532	0.728612487	5.7907524	5.22E-09	9.28E-09	up regulation
TLX1	0.011597016	0.640005674	5.786259169	1.11E-19	3.47E-19	up regulation
SLC30A8	0.193285118	10.63811315	5.782367915	1.83E-07	2.98E-07	up regulation
DSCAM-AS1	0.175520932	9.656427203	5.781774507	8.76E-24	3.37E-23	up regulation
HIST1H3B	0.038299027	2.054514376	5.745345881	3.28E-37	2.66E-36	up regulation
LINC01705	0.02305243	1.228216681	5.735502467	1.55E-56	7.17E-55	up regulation
LINC01522	0.05275839	2.798210473	5.728960122	7.33E-27	3.30E-26	up regulation
LINC00052	0.064423216	3.180263126	5.625421634	3.57E-17	9.81E-17	up regulation
CLEC3A	1.601467683	77.69390851	5.6003349	0.022829185	0.026109013	up regulation
HOXB13	0.035062605	1.695919933	5.595991076	6.48E-15	1.58E-14	up regulation
GNG13	0.024013133	1.161381648	5.595874697	2.79E-50	6.17E-49	up regulation
NKX2-2	0.010877539	0.525750016	5.594952885	1.06E-08	1.85E-08	up regulation
ABCC13	0.008900579	0.429043847	5.591082139	1.29E-08	2.24E-08	up regulation
LRTM2	0.009784556	0.46817711	5.580404274	1.65E-27	7.72E-27	up regulation
HIST1H2AJ	0.013949262	0.660078662	5.564377237	6.61E-31	3.70E-30	up regulation
TRH	0.283396349	12.96917346	5.516121554	0.009447359	0.011150073	up regulation
LINC01614	0.201205025	8.959927107	5.476748752	1.92E-63	8.28E-61	up regulation
IL19	0.010482582	0.4234431	5.336102039	6.92E-28	3.31E-27	up regulation
LIN28A	0.009731304	0.386667545	5.312316664	0.005682786	0.006831877	up regulation
GRM4	0.014833988	0.585762295	5.303336953	1.10E-51	2.82E-50	up regulation
HAPLN1	0.023565531	0.92471581	5.294259935	3.63E-37	2.93E-36	up regulation
INSM1	0.073759326	2.891485908	5.292841791	9.61E-13	2.09E-12	up regulation
CST2	0.139418182	5.362215351	5.265338531	5.15E-46	7.64E-45	up regulation
HIST1H1B	0.046237156	1.745216952	5.238209928	1.26E-29	6.57E-29	up regulation
AL358913.1	0.051403899	1.88126102	5.193678427	2.19E-19	6.75E-19	up regulation
CDC20B	0.050576765	1.812363124	5.163253465	1.10E-16	2.93E-16	up regulation
ASCL1	0.076213104	2.645605777	5.117415217	5.90E-07	9.29E-07	up regulation
AC093895.1	0.008526568	0.294709936	5.111186785	1.79E-43	2.21E-42	up regulation
GATA4	0.011182308	0.380851854	5.089940009	0.001056101	0.001345409	up regulation
ZFP42	0.013934134	0.455348074	5.030274526	0.026215431	0.029838126	up regulation
CDK5R2	0.010496113	0.339290072	5.014592197	7.91E-11	1.56E-10	up regulation
AC022196.1	0.01772671	0.567226162	4.999927389	3.90E-11	7.80E-11	up regulation
CXADRP3	0.036503854	1.14220013	4.967622839	1.95E-06	2.97E-06	up regulation
CD177	0.129095633	4.015133352	4.958935797	6.21E-14	1.44E-13	up regulation
HIST1H4B	0.02881026	0.891781763	4.952036102	4.96E-14	1.15E-13	up regulation
SLC24A2	0.019195714	0.588116617	4.93724613	1.15E-54	4.10E-53	up regulation
HIST1H4A	0.015787231	0.482235319	4.932907222	3.20E-14	7.52E-14	up regulation
SYT13	0.439588514	13.37299187	4.927024767	2.79E-17	7.71E-17	up regulation
HIST1H3F	0.038114439	1.15161927	4.917182372	3.12E-21	1.06E-20	up regulation
RN7SL2	28.69372613	863.60445	4.911563445	1.11E-17	3.14E-17	up regulation
HIST1H2BI	0.016223917	0.484809292	4.901223253	1.64E-14	3.92E-14	up regulation
PLPP4	0.161375418	4.815090273	4.899070106	6.20E-60	5.86E-58	up regulation
SRGAP3-AS2	0.008129919	0.241795676	4.894403612	8.09E-07	1.27E-06	up regulation
CRYBA2	0.007952612	0.235225997	4.886474912	7.55E-17	2.04E-16	up regulation
IGFL3	0.028889134	0.854157515	4.88590328	8.47E-31	4.72E-30	up regulation
AC083967.1	0.054952581	1.608221412	4.871134981	3.74E-38	3.21E-37	up regulation
PVALB	0.492522912	14.33308104	4.863014115	4.81E-05	6.72E-05	up regulation
BCAR4	0.012897106	0.364319356	4.820084325	1.06E-05	1.55E-05	up regulation
PRAME	0.297100942	8.265277154	4.798038111	4.93E-07	7.81E-07	up regulation
RN7SL5P	0.050358122	1.396547054	4.793495888	3.29E-17	9.04E-17	up regulation
4-Mar	0.009778249	0.269734928	4.785822405	2.99E-47	4.91E-46	up regulation
CLDN6	0.053165068	1.455327076	4.774720975	4.47E-13	9.87E-13	up regulation
HIST1H4C	0.072854166	1.948020826	4.740853811	2.45E-19	7.54E-19	up regulation
PLAC1	0.030772325	0.818467023	4.733218951	1.01E-52	2.86E-51	up regulation
S100P	1.758279263	46.27467594	4.717986754	4.54E-43	5.44E-42	up regulation
HIST1H2AI	0.173993611	4.500240396	4.692895834	1.82E-47	3.06E-46	up regulation
NDST4	0.015500511	0.397825566	4.681748317	0.012379608	0.014455226	up regulation
CA9	0.155718235	3.995788116	4.681470276	0.000522175	0.000680086	up regulation
HIST1H2BB	0.009900561	0.253805817	4.680071051	1.06E-13	2.42E-13	up regulation
HIST1H2BO	0.077805384	1.994116795	4.679736112	7.65E-50	1.60E-48	up regulation
RN7SL396P	0.034424456	0.880277311	4.676452336	1.98E-08	3.40E-08	up regulation
AC012213.4	0.032555488	0.80674838	4.631146095	7.95E-09	1.40E-08	up regulation
LINC02224	0.225401353	5.505123184	4.610206764	0.000112997	0.000153885	up regulation
CELF3	0.009290125	0.225348864	4.600318401	1.16E-22	4.21E-22	up regulation
SBSN	0.133378359	3.174788307	4.573063886	4.98E-05	6.94E-05	up regulation
HIST1H3J	0.01580476	0.373215806	4.561579088	2.49E-46	3.80E-45	up regulation
SPATA20P1	0.024932768	0.587159239	4.557636878	4.22E-47	6.84E-46	up regulation
COMP	1.97321056	46.18345274	4.548759217	1.40E-54	4.91E-53	up regulation
LINC00922	0.024295998	0.560435963	4.527758925	2.37E-54	8.11E-53	up regulation
AP001434.1	0.021137352	0.487084564	4.526305678	3.73E-39	3.45E-38	up regulation
GABRA3	0.012219531	0.280478052	4.5206271	0.002358444	0.002924893	up regulation
S100A7A	0.099141344	2.270891765	4.517628318	9.43E-05	0.000129052	up regulation
ORM2	0.253403493	5.67800467	4.485875719	3.02E-06	4.56E-06	up regulation
WT1	0.062169415	1.391170452	4.48395038	5.83E-31	3.28E-30	up regulation
FOXJ1	0.126720702	2.828490447	4.480308156	4.71E-16	1.22E-15	up regulation
KCCAT333	0.044717615	0.996353678	4.477742814	3.39E-05	4.79E-05	up regulation
OR2B6	0.029893762	0.66279494	4.470646233	1.24E-50	2.86E-49	up regulation
MYT1	0.031084201	0.688888148	4.470016377	1.54E-28	7.62E-28	up regulation
MUC5AC	0.02110797	0.466837535	4.467060809	1.79E-07	2.91E-07	up regulation
FOXD3-AS1	0.10108007	2.227091632	4.461590448	9.68E-35	6.77E-34	up regulation
THSD4-AS1	0.014008253	0.305524952	4.446941296	0.000259153	0.000344324	up regulation
PYDC1	0.371526776	8.089481694	4.444509173	6.55E-12	1.36E-11	up regulation
PRSS2	0.130475794	2.817546025	4.432585087	8.55E-07	1.33E-06	up regulation
HIST1H2AL	0.02820191	0.607045367	4.427939543	3.98E-34	2.70E-33	up regulation
AC092801.1	0.028715855	0.615829104	4.422610608	9.06E-14	2.08E-13	up regulation
PAGE2B	0.029513025	0.631057898	4.418348651	0.002376011	0.002945891	up regulation
HIST1H2AB	0.019475526	0.41470762	4.412360329	5.66E-16	1.46E-15	up regulation
HIST1H4D	0.113295234	2.398016917	4.403682765	7.23E-39	6.52E-38	up regulation
RN7SL4P	0.174490216	3.685667111	4.400707723	6.03E-11	1.19E-10	up regulation
ACTL6B	0.010392086	0.219500808	4.400669014	0.003301982	0.004048451	up regulation
TYRP1	0.030701375	0.645620521	4.394311256	2.83E-15	7.00E-15	up regulation
AC010307.4	0.019054174	0.398866868	4.387728297	1.33E-31	7.78E-31	up regulation
AC090125.1	0.013570661	0.280664954	4.370286071	2.47E-31	1.42E-30	up regulation
AC061961.1	0.107070957	2.178495964	4.346693329	0.000336069	0.000442584	up regulation
LHX2	0.017449351	0.353826942	4.34179859	4.19E-38	3.58E-37	up regulation
MAEL	0.034789451	0.699085629	4.328747348	0.000115443	0.000157112	up regulation
SBK2	0.011504421	0.230955961	4.32735749	3.47E-09	6.25E-09	up regulation
AP000696.1	0.019547476	0.389501372	4.3165742	5.52E-19	1.67E-18	up regulation
AC103702.2	0.014897946	0.296581692	4.315244166	3.97E-19	1.21E-18	up regulation
HIST2H2AB	0.050355421	0.997680921	4.308359477	7.18E-16	1.83E-15	up regulation
FAM25A	0.076708175	1.514041228	4.30288035	0.013743895	0.015981794	up regulation
CAMP	0.125186838	2.46987925	4.302285725	4.10E-36	3.10E-35	up regulation
BMPR1B-DT	0.131172637	2.582206674	4.299065767	1.81E-07	2.94E-07	up regulation
CHRNA6	0.025504914	0.500856354	4.295549775	4.57E-49	8.94E-48	up regulation
AC062028.1	0.065134951	1.277338654	4.293565368	0.000551848	0.000717221	up regulation
ACAN	0.080906065	1.586545778	4.293497485	7.73E-42	8.61E-41	up regulation
C1orf105	0.011976314	0.234008021	4.288302071	1.69E-14	4.02E-14	up regulation
FABP6	0.046622122	0.907379203	4.28261902	8.15E-14	1.87E-13	up regulation
TMEM270	0.025644872	0.496479521	4.274991922	2.30E-47	3.83E-46	up regulation
HIST1H1E	0.239870664	4.620989899	4.267873303	2.39E-26	1.05E-25	up regulation
KIF1A	0.080506984	1.543282905	4.260744802	0.000247823	0.000329672	up regulation
SLC25A24P1	0.135477714	2.595830781	4.260068884	1.17E-11	2.39E-11	up regulation
CEACAM5	0.831078532	15.86515274	4.254732791	3.77E-22	1.33E-21	up regulation
GJB2	1.01325962	19.12378879	4.238292599	4.15E-53	1.24E-51	up regulation
HIST1H3H	0.523690667	9.865511713	4.235607086	1.78E-48	3.30E-47	up regulation
MAFA-AS1	0.019259318	0.357392078	4.213879111	4.20E-24	1.64E-23	up regulation
SLC25A24P2	0.091400725	1.666616806	4.188573013	2.80E-09	5.06E-09	up regulation
BMPR1B	1.839552161	33.3033079	4.178238992	2.27E-10	4.35E-10	up regulation
CEACAM6	4.053313074	73.23145156	4.175289875	8.67E-18	2.46E-17	up regulation
SYT5	0.017372926	0.311166638	4.162774762	4.81E-18	1.39E-17	up regulation
NEK2	0.507339536	9.075015955	4.160876683	8.30E-65	6.99E-62	up regulation
KRT75	0.047682899	0.848797976	4.15387737	0.000354109	0.00046558	up regulation
HIST1H4E	0.325341058	5.789804332	4.153489784	1.70E-29	8.85E-29	up regulation
AC026355.2	0.017117625	0.30142875	4.138262531	8.41E-22	2.93E-21	up regulation
KISS1R	0.047895355	0.840454223	4.133211588	2.57E-29	1.33E-28	up regulation
CCL11	0.080012385	1.402866862	4.132010959	3.84E-55	1.44E-53	up regulation
MS4A15	0.111694972	1.943366816	4.120922087	3.28E-36	2.49E-35	up regulation
CYP2A7P2	0.069338897	1.205445026	4.119757167	3.79E-08	6.42E-08	up regulation
AF178030.1	0.117656738	2.024602195	4.104982618	2.05E-07	3.33E-07	up regulation
UBE2C	1.911204409	32.81623119	4.101855569	3.25E-62	7.83E-60	up regulation
ELFN1-AS1	0.049141889	0.840933639	4.096966727	9.59E-06	1.40E-05	up regulation
KCNH1-IT1	0.027323352	0.467025442	4.095294747	4.63E-20	1.48E-19	up regulation
IGHE	0.073059163	1.243525536	4.08922709	6.66E-26	2.86E-25	up regulation
HIST1H2AM	0.118028192	2.004766722	4.086230967	1.83E-50	4.14E-49	up regulation
NPW	0.085613081	1.44423326	4.076328722	1.47E-26	6.53E-26	up regulation
NKAIN1	1.022713471	17.12830345	4.065908346	8.66E-31	4.82E-30	up regulation
GAL3ST2	0.048065343	0.787876126	4.034899896	3.68E-32	2.22E-31	up regulation
RN7SL128P	0.05673636	0.928297694	4.032242043	4.13E-10	7.79E-10	up regulation
PAX7	0.03155605	0.513973768	4.025706216	8.59E-11	1.69E-10	up regulation
VGF	0.041275822	0.666332515	4.012873458	1.35E-41	1.47E-40	up regulation
MUC19	0.017794979	0.285269406	4.002782869	0.024836292	0.028331045	up regulation
LINC00518	0.015082585	0.240292026	3.993833153	0.00259574	0.003209304	up regulation
MSMB	3.101643232	49.32641941	3.991255912	3.55E-07	5.67E-07	up regulation
AL928742.1	0.058420902	0.928730645	3.990703704	6.78E-22	2.37E-21	up regulation
HOXC12	0.117770273	1.870989158	3.989753867	8.65E-10	1.61E-09	up regulation
AC012213.1	0.022541424	0.357644643	3.98787625	0.000213846	0.000285806	up regulation
IVL	0.039450205	0.619168805	3.972228073	0.000678799	0.000876743	up regulation
CASC16	0.035068144	0.545922168	3.960462316	9.54E-07	1.48E-06	up regulation
VSTM2A	0.297199142	4.626041147	3.960276242	0.00444213	0.005394951	up regulation
AL122019.1	0.014849305	0.228204957	3.94186283	1.09E-10	2.13E-10	up regulation
SCT	0.120890207	1.851220247	3.936707266	1.60E-52	4.46E-51	up regulation
UNC13A	0.028827203	0.440560663	3.933837913	1.05E-30	5.84E-30	up regulation
HIST1H3C	0.046987424	0.718084797	3.933807642	2.21E-25	9.27E-25	up regulation
AC092484.1	0.016266908	0.248398051	3.932641852	8.61E-15	2.09E-14	up regulation
PITX1	0.671086464	10.21607457	3.928198493	1.57E-48	2.92E-47	up regulation
AF015262.1	0.016859299	0.255377081	3.92101261	4.29E-19	1.31E-18	up regulation
CAPSL	0.08315094	1.259135356	3.920557003	8.74E-23	3.19E-22	up regulation
PKMYT1	0.277596308	4.201603831	3.919879851	1.13E-63	5.65E-61	up regulation
NXPH1	0.154889875	2.340586724	3.917555476	0.034914178	0.039309206	up regulation
AC092071.1	0.113666972	1.701542042	3.903957777	1.31E-11	2.68E-11	up regulation
BPIFB1	1.067133137	15.73829263	3.882466953	1.09E-08	1.91E-08	up regulation
HIST1H2BF	0.204447906	3.01082385	3.880353113	3.05E-37	2.48E-36	up regulation
AC105118.1	0.030781134	0.449530478	3.868300663	9.92E-27	4.45E-26	up regulation
RN7SL752P	0.066011107	0.963667339	3.867754518	9.81E-08	1.62E-07	up regulation
KREMEN2	0.099135252	1.447142379	3.867664902	1.65E-48	3.08E-47	up regulation
CNTNAP2	0.266051903	3.874260016	3.864141153	1.96E-27	9.13E-27	up regulation
TNNI3	0.062090604	0.896971085	3.852614597	1.18E-16	3.15E-16	up regulation
EPO	0.055366097	0.796783976	3.847113917	2.01E-08	3.46E-08	up regulation
AC116025.2	0.016662953	0.238811635	3.841157116	1.91E-36	1.47E-35	up regulation
TACC1P1	0.021109486	0.299301824	3.825637715	7.55E-06	1.11E-05	up regulation
Z82214.2	0.034345033	0.486721101	3.824921937	1.31E-08	2.28E-08	up regulation
LGALS17A	0.039643838	0.561077357	3.82303116	6.19E-31	3.48E-30	up regulation
CRISP3	2.217205839	31.19442128	3.814473427	0.02163841	0.024797664	up regulation
DQX1	0.061098233	0.858394125	3.812437632	3.74E-38	3.21E-37	up regulation
HIST1H2BE	0.081611049	1.144506724	3.809817634	4.71E-48	8.39E-47	up regulation
LRRC15	1.816773471	25.46551711	3.809094564	5.43E-50	1.16E-48	up regulation
INA	0.034488057	0.479099661	3.796157036	7.90E-05	0.000108816	up regulation
CYP2B7P	2.755638931	38.17204761	3.792057806	2.37E-07	3.84E-07	up regulation
LINC01224	0.035269328	0.482681697	3.774586118	6.07E-10	1.14E-09	up regulation
KIF4A	0.483607787	6.574171839	3.764899786	5.53E-63	1.86E-60	up regulation
TDO2	0.071496296	0.971704287	3.764576934	3.55E-53	1.08E-51	up regulation
CCL7	0.053390647	0.724355101	3.762038192	7.17E-20	2.26E-19	up regulation
LHFPL5	0.019214797	0.260386944	3.760367475	9.47E-23	3.45E-22	up regulation
PGLYRP4	0.018135675	0.244692048	3.754064851	0.000132581	0.000179736	up regulation
MYBL2	1.676301358	22.48178492	3.745403143	2.42E-54	8.28E-53	up regulation
TMEM145	0.136566034	1.809743287	3.728114452	2.06E-33	1.34E-32	up regulation
HIST1H2AH	0.051375824	0.67224243	3.709820066	2.38E-09	4.31E-09	up regulation
AC112721.1	0.028518903	0.371380846	3.702909012	3.22E-43	3.89E-42	up regulation
CXCL11	0.648860757	8.44249485	3.701688575	5.76E-40	5.63E-39	up regulation
NUF2	0.436767875	5.674710527	3.699608147	1.09E-62	3.36E-60	up regulation
HCN2	0.044526126	0.576137712	3.693689682	2.14E-54	7.42E-53	up regulation
APOA1	0.060862884	0.780806161	3.68132983	3.86E-09	6.92E-09	up regulation
AC105219.1	0.050742415	0.65073585	3.680807944	3.81E-34	2.60E-33	up regulation
PRSS1	0.040723385	0.520910512	3.677106169	0.000553283	0.000718935	up regulation
TPSP2	0.368289722	4.699460355	3.673582059	2.99E-18	8.72E-18	up regulation
INSYN2	0.276508484	3.5227497	3.67130632	3.83E-12	8.05E-12	up regulation
AC093063.1	0.025472492	0.321123065	3.656114268	1.18E-19	3.70E-19	up regulation
TMEM75	0.025531944	0.319937021	3.647412671	2.55E-09	4.61E-09	up regulation
LINC01644	0.084028988	1.05150363	3.645422903	1.95E-13	4.38E-13	up regulation
HIST1H2BL	0.068522586	0.855775068	3.642580153	1.88E-28	9.26E-28	up regulation
TUBB3	0.074828634	0.931970962	3.638622669	4.10E-48	7.35E-47	up regulation
GATA5	0.039680521	0.493319199	3.636018543	0.002846985	0.003511035	up regulation
IQGAP3	0.516210662	6.405834368	3.633354651	9.25E-62	1.73E-59	up regulation
HIST1H1D	0.204405728	2.528285738	3.628651989	2.93E-22	1.04E-21	up regulation
SPINK4	0.073826615	0.910821069	3.624954741	4.50E-14	1.05E-13	up regulation
AC004233.2	0.099290152	1.218208074	3.616966128	2.71E-16	7.08E-16	up regulation
HTR1D	0.038905853	0.474072484	3.607048525	3.19E-43	3.87E-42	up regulation
LINC01929	0.05490434	0.667353191	3.603458406	1.03E-39	9.88E-39	up regulation
NMU	0.185042148	2.24597964	3.60141903	7.08E-21	2.36E-20	up regulation
LINC02544	0.445531947	5.355176941	3.587333454	1.23E-49	2.54E-48	up regulation
AC064799.2	0.051888952	0.620952858	3.580984432	0.010086619	0.011881847	up regulation
SERPINB7	0.07728988	0.921222916	3.575198877	1.12E-08	1.96E-08	up regulation
MELK	0.616169059	7.341408129	3.574658663	2.16E-60	2.38E-58	up regulation
EPHA8	0.02174387	0.258533262	3.571669238	2.55E-21	8.70E-21	up regulation
MEPE	0.029828895	0.353368106	3.566389394	5.66E-09	1.00E-08	up regulation
LINC02489	0.074072408	0.874935698	3.562168841	1.99E-17	5.55E-17	up regulation
HIST1H2AD	0.413859113	4.885653568	3.561339938	1.58E-43	1.95E-42	up regulation
AC123023.1	0.056653956	0.667530135	3.558584366	1.45E-07	2.37E-07	up regulation
EMX1	0.044566145	0.524355216	3.556524392	4.51E-13	9.97E-13	up regulation
CXCL10	4.364466345	50.87769199	3.543156058	1.65E-41	1.79E-40	up regulation
WISP1	0.49009153	5.697947578	3.53931923	7.16E-59	5.03E-57	up regulation
TPX2	2.051535865	23.49216592	3.517403451	2.96E-62	7.42E-60	up regulation
AC131097.1	0.019158522	0.218644125	3.512526399	2.48E-24	9.81E-24	up regulation
TROAP	0.353831868	3.951676375	3.481328905	8.00E-61	1.04E-58	up regulation
KIF18B	0.254987622	2.847339165	3.481115231	9.63E-60	8.50E-58	up regulation
AC131097.3	0.061431227	0.685466006	3.480041014	5.48E-32	3.28E-31	up regulation
AL117329.1	0.027106339	0.301880675	3.477276206	4.04E-18	1.17E-17	up regulation
AL023754.1	0.034871755	0.387510671	3.474105153	0.00016759	0.000225646	up regulation
AL023803.2	0.030886237	0.342557279	3.471309242	4.80E-46	7.15E-45	up regulation
PPP2R2C	0.246230952	2.730855981	3.471269205	2.47E-13	5.54E-13	up regulation
BIRC5	1.20961148	13.40424355	3.470074163	1.11E-57	6.25E-56	up regulation
ISG15	12.37293732	136.7493258	3.466273781	7.22E-45	9.84E-44	up regulation
HOXC11	0.273268352	3.019934849	3.466127132	7.16E-27	3.23E-26	up regulation
SNORA2C	0.221016088	2.433103756	3.460574548	0.000176549	0.000237311	up regulation
ASPM	0.298546244	3.264850549	3.450990631	1.09E-57	6.16E-56	up regulation
GACAT2	0.061875964	0.673936927	3.445162583	0.030652774	0.034682044	up regulation
AOC1	0.101318748	1.102699691	3.444066886	5.52E-11	1.10E-10	up regulation
HIST1H2BH	0.50882268	5.532396691	3.442669724	3.65E-36	2.76E-35	up regulation
DIO1	0.529256144	5.749179713	3.441318111	4.06E-09	7.27E-09	up regulation
HJURP	0.399475853	4.339123315	3.441223381	5.81E-61	7.92E-59	up regulation
AC112721.2	0.063893826	0.693804575	3.440780915	3.75E-45	5.23E-44	up regulation
CDC20	1.931317261	20.94971013	3.439273199	1.26E-58	8.51E-57	up regulation
KIF14	0.173282094	1.871746722	3.433190738	1.65E-56	7.58E-55	up regulation
FAM83D	0.772175858	8.337513846	3.432615898	8.43E-57	4.08E-55	up regulation
MIR8071-1	0.570084164	6.10290564	3.420249454	5.35E-19	1.62E-18	up regulation
TOP2A	2.600795545	27.81007099	3.418582533	1.13E-57	6.32E-56	up regulation
CCDC78	0.189124277	2.021398426	3.417947236	6.67E-48	1.17E-46	up regulation
CILP2	0.383610834	4.097520161	3.417035676	4.82E-55	1.79E-53	up regulation
IL20	0.341400085	3.637200174	3.413293005	1.93E-11	3.93E-11	up regulation
FOXM1	0.975243988	10.22949429	3.390827815	3.69E-59	2.77E-57	up regulation
INHBA	1.073990441	11.26300162	3.390538303	6.14E-59	4.41E-57	up regulation
SCARNA12	0.300216251	3.144161652	3.388601414	0.021044954	0.024144437	up regulation
HIST1H3D	0.583855752	6.099866619	3.385093812	1.04E-44	1.41E-43	up regulation
PBK	0.698351114	7.26611046	3.379158822	8.87E-60	7.94E-58	up regulation
RNU6-813P	0.506460969	5.26346424	3.377489651	7.26E-07	1.14E-06	up regulation
RIMS4	0.640637519	6.615262764	3.368218266	8.94E-11	1.75E-10	up regulation
CEP55	0.759521763	7.826611034	3.365224539	2.36E-60	2.53E-58	up regulation
HAGHL	0.265318958	2.733589589	3.364996991	6.63E-57	3.26E-55	up regulation
ADGRF4	0.026368355	0.27061397	3.359356861	1.98E-18	5.82E-18	up regulation
PLK1	0.676040891	6.925219824	3.356677449	5.03E-61	7.10E-59	up regulation
HOXC-AS3	0.043939001	0.449372981	3.354339422	3.97E-24	1.56E-23	up regulation
SOX2	0.094242775	0.961902356	3.351436524	0.021437494	0.024579574	up regulation
EXO1	0.370569031	3.768203362	3.346062602	4.97E-58	2.98E-56	up regulation
RIIAD1	0.043906784	0.44552032	3.342975474	6.51E-28	3.12E-27	up regulation
MAB21L4	0.641954269	6.48889672	3.337430772	1.52E-12	3.26E-12	up regulation
AL138878.2	0.044315889	0.446568391	3.332985175	5.16E-15	1.26E-14	up regulation
RRM2	1.194880694	11.98794218	3.326645551	9.89E-59	6.76E-57	up regulation
ITPKA	0.074651003	0.7456237	3.320214172	4.10E-45	5.69E-44	up regulation
NEIL3	0.129358372	1.291062356	3.319113353	1.42E-58	9.51E-57	up regulation
ANLN	0.832316456	8.284098969	3.315140724	3.53E-58	2.18E-56	up regulation
GAD1	0.04133704	0.411402067	3.31504206	7.96E-05	0.000109514	up regulation
HIST1H2APS3	0.153683906	1.5175561	3.303711857	9.08E-19	2.72E-18	up regulation
KIF20A	0.819234867	8.072555419	3.300676416	4.23E-59	3.13E-57	up regulation
AL031777.1	0.317729311	3.124110391	3.297575338	2.75E-36	2.10E-35	up regulation
CDC25C	0.217133668	2.132697006	3.296023664	1.07E-60	1.35E-58	up regulation
SKA1	0.310018249	3.039131284	3.293233952	4.82E-59	3.56E-57	up regulation
AURKB	0.665564303	6.521898516	3.292642029	2.75E-57	1.41E-55	up regulation
AP000439.2	0.682854412	6.676564942	3.289456108	6.92E-09	1.22E-08	up regulation
KRT37	0.025262523	0.245720193	3.281945808	2.76E-17	7.63E-17	up regulation
LINC01842	0.061682926	0.599137975	3.279945181	1.46E-17	4.08E-17	up regulation
ATP1A3	0.091883194	0.892163661	3.279435475	5.84E-30	3.10E-29	up regulation
ZPLD1	0.072158226	0.699899724	3.277912461	0.000526953	0.00068602	up regulation
AP001542.1	0.15009698	1.453827396	3.275889144	1.34E-44	1.79E-43	up regulation
ONECUT2	0.027140101	0.262833409	3.27565067	0.0001311	0.000177806	up regulation
AC104564.4	0.045630522	0.44147412	3.274257798	6.70E-21	2.24E-20	up regulation
MIR554	0.093012635	0.898646467	3.272255057	1.13E-07	1.86E-07	up regulation
CKAP2L	0.263930991	2.548586277	3.271464528	1.81E-59	1.46E-57	up regulation
CNIH2	0.26626644	2.567397244	3.269364028	1.67E-57	9.04E-56	up regulation
UHRF1	0.477826829	4.604824723	3.268586477	1.69E-61	2.81E-59	up regulation
CLPSL2	0.272624706	2.62379054	3.266664337	1.35E-34	9.43E-34	up regulation
AC134312.5	0.088140481	0.844132202	3.259592279	8.79E-51	2.06E-49	up regulation
CXCR2P1	0.136370403	1.304120223	3.2574744	2.48E-16	6.50E-16	up regulation
LINC01208	0.073119025	0.699210478	3.25740806	0.016843256	0.01945035	up regulation
GABRD	0.22002303	2.098950932	3.253941995	1.58E-60	1.83E-58	up regulation
AC133644.2	0.114052127	1.08701479	3.252606312	1.31E-32	8.10E-32	up regulation
KIF2C	0.875675827	8.262353768	3.238084041	7.80E-60	7.15E-58	up regulation
AC013652.1	0.053814668	0.505067458	3.230404733	2.02E-27	9.40E-27	up regulation
NELL2	0.937139977	8.762064849	3.224934433	2.83E-10	5.41E-10	up regulation
PCLAF	0.591655489	5.525771437	3.22334662	3.81E-63	1.48E-60	up regulation
CENPA	0.442898155	4.126937251	3.220024611	2.57E-56	1.15E-54	up regulation
DLGAP5	0.570080064	5.279853821	3.211261532	7.63E-59	5.32E-57	up regulation
AC018816.1	0.616706921	5.698070531	3.207816536	0.000708336	0.000913556	up regulation
AC055854.1	0.348073404	3.21502807	3.207367846	1.21E-16	3.23E-16	up regulation
BUB1	0.526452689	4.85926405	3.20636204	8.51E-60	7.69E-58	up regulation
HIST1H1PS1	0.635633986	5.857562382	3.204032245	7.28E-38	6.12E-37	up regulation
NAT1	5.227454251	48.043594	3.200163643	3.60E-14	8.44E-14	up regulation
C2orf48	0.039034489	0.358465054	3.199011188	5.94E-37	4.74E-36	up regulation
AP005131.4	0.032912971	0.301835677	3.197035184	0.03284911	0.037072024	up regulation
TFR2	0.086901919	0.79526079	3.193968094	4.15E-42	4.72E-41	up regulation
CLEC5A	0.194612726	1.779988359	3.19318985	8.21E-52	2.13E-50	up regulation
PNLIPRP2	0.029137468	0.265475814	3.187633011	5.76E-10	1.08E-09	up regulation
CENPF	1.176217829	10.69167911	3.184261274	2.19E-59	1.73E-57	up regulation
SGO1	0.19514752	1.768993643	3.180291833	1.22E-57	6.77E-56	up regulation
UBE2T	2.592213842	23.49453375	3.180068495	5.28E-64	2.97E-61	up regulation
CCR8	0.071001634	0.643219483	3.179386969	8.65E-36	6.41E-35	up regulation
AC245100.3	0.065830716	0.594873672	3.175750536	2.84E-11	5.72E-11	up regulation
DEPDC1	0.279218043	2.519389212	3.173609939	4.41E-55	1.65E-53	up regulation
AL591468.1	0.024451128	0.219973602	3.16935747	4.73E-19	1.44E-18	up regulation
FCRLB	0.355001634	3.192041795	3.168581971	2.81E-11	5.66E-11	up regulation
CRYBG2	0.065321929	0.586448897	3.166366102	2.66E-46	4.06E-45	up regulation
AC104984.1	0.024779956	0.221438795	3.159662473	3.02E-07	4.85E-07	up regulation
MS4A8	0.097396595	0.86926702	3.157856166	2.03E-09	3.68E-09	up regulation
HIST2H2AC	0.505392802	4.506628032	3.156571356	2.10E-37	1.72E-36	up regulation
FOXD3	0.037158734	0.331271234	3.156239669	1.77E-14	4.22E-14	up regulation
MISP	1.72800162	15.39202878	3.155006926	1.46E-38	1.29E-37	up regulation
MRPL40P1	0.035654076	0.315022134	3.143314293	1.08E-37	9.01E-37	up regulation
CXCL9	4.833519276	42.69019645	3.142758901	2.24E-23	8.40E-23	up regulation
PRLH	0.0360299	0.318043335	3.141956783	3.87E-16	1.00E-15	up regulation
AP005131.3	0.088434297	0.778748526	3.138479637	1.13E-16	3.02E-16	up regulation
NDC80	0.549573075	4.82409398	3.133874783	7.80E-60	7.15E-58	up regulation
PTTG1	1.436833088	12.59861312	3.132300543	2.58E-61	3.96E-59	up regulation
DMBX1	0.030422679	0.266734291	3.132184223	4.29E-23	1.59E-22	up regulation
ZNF695	0.081681043	0.715883642	3.131651921	1.19E-44	1.59E-43	up regulation
ARTN	0.218269313	1.910075531	3.129448471	1.30E-41	1.42E-40	up regulation
HHIPL2	0.11649747	1.018955666	3.12872075	9.90E-14	2.27E-13	up regulation
NBPF4	0.108784612	0.950423138	3.12709546	2.85E-07	4.59E-07	up regulation
AC013724.1	0.032759863	0.285991746	3.125972269	0.00010759	0.000146748	up regulation
SYNGR4	0.032133329	0.280025103	3.123413809	9.51E-41	9.81E-40	up regulation
SYNGR3	0.112753382	0.981502631	3.121821429	1.33E-46	2.09E-45	up regulation
IGHG1	69.03533476	600.2424557	3.120138486	5.90E-11	1.17E-10	up regulation
AC012531.3	0.061231544	0.529736792	3.112928736	3.60E-19	1.10E-18	up regulation
RUNDC3A	0.124194253	1.071469609	3.108920607	0.024986897	0.028495827	up regulation
HIST3H2BB	0.152674429	1.316535559	3.108216132	1.24E-28	6.14E-28	up regulation
AC112777.1	0.08031993	0.692558315	3.108105638	2.30E-51	5.69E-50	up regulation
MCM10	0.325238692	2.80194706	3.106858893	1.71E-52	4.74E-51	up regulation
CDK1	1.467297365	12.61461687	3.103863205	1.09E-61	2.00E-59	up regulation
MMP9	7.655507701	65.75575903	3.102547291	4.74E-31	2.68E-30	up regulation
CEMIP	0.359465438	3.077225711	3.097705296	2.25E-43	2.75E-42	up regulation
AC097059.1	0.169829426	1.45169144	3.095576483	3.44E-16	8.95E-16	up regulation
SPC24	0.49980523	4.271296364	3.0952361	1.23E-60	1.52E-58	up regulation
MNX1	0.053594268	0.457278144	3.092921352	1.53E-14	3.65E-14	up regulation
SNORA11	1.319482236	11.24415551	3.091131479	1.17E-09	2.16E-09	up regulation
NBPF6	0.066017851	0.561033477	3.087158775	1.30E-07	2.14E-07	up regulation
AL161646.1	0.137826761	1.170374421	3.086042205	3.49E-10	6.63E-10	up regulation
RIPPLY3	0.188593712	1.600934805	3.085561076	2.17E-39	2.02E-38	up regulation
AURKA	1.117367913	9.4587915	3.081551573	2.08E-62	5.49E-60	up regulation
IGFL2	0.09198029	0.777917151	3.080219857	1.38E-32	8.53E-32	up regulation
AL032819.2	0.149460746	1.263285511	3.079342207	2.92E-18	8.51E-18	up regulation
TGFBR3L	0.051018049	0.430984503	3.078556373	3.01E-28	1.47E-27	up regulation
ADAMTS14	0.168549542	1.412571788	3.067079578	2.20E-54	7.59E-53	up regulation
KIFC1	1.363992948	11.41011307	3.064404998	5.50E-60	5.34E-58	up regulation
CAMK2N2	0.093870796	0.785204227	3.064319634	4.87E-44	6.24E-43	up regulation
KCNH1	0.048929173	0.408466707	3.061451693	7.45E-14	1.71E-13	up regulation
AC110619.1	0.322730104	2.683687543	3.05581665	5.92E-17	1.61E-16	up regulation
ULBP1	0.069466334	0.576067072	3.051850936	2.25E-27	1.04E-26	up regulation
IL17REL	0.037399044	0.308272261	3.043131789	4.46E-26	1.93E-25	up regulation
RAB26	0.548957079	4.478561639	3.028270203	7.64E-46	1.12E-44	up regulation
AL032819.1	0.039367759	0.320978187	3.027388765	2.16E-23	8.12E-23	up regulation
AL356311.1	0.492928507	4.005344913	3.02247616	4.44E-08	7.49E-08	up regulation
MIR4666A	0.075129314	0.609810852	3.020913987	5.64E-18	1.62E-17	up regulation
NEURL1	0.397474348	3.223921069	3.019882764	3.74E-24	1.47E-23	up regulation
CDCA5	0.966126101	7.835590024	3.019758504	3.93E-59	2.92E-57	up regulation
TUBA3E	0.16278964	1.308917033	3.007292862	5.65E-13	1.24E-12	up regulation
CNTD2	0.535087542	4.301997793	3.00715994	1.82E-33	1.19E-32	up regulation
CARD17	0.047754018	0.383490244	3.005495853	2.76E-16	7.23E-16	up regulation
MKI67	1.092243039	8.762996849	3.004130429	7.91E-56	3.28E-54	up regulation
ST8SIA6-AS1	0.427543355	3.414863934	2.997685465	3.29E-13	7.32E-13	up regulation
NCAPG	0.524924372	4.186068848	2.99541455	4.91E-58	2.95E-56	up regulation
AL121578.3	0.033342708	0.265048055	2.990810753	1.15E-09	2.12E-09	up regulation
ASF1B	1.584864239	12.59713598	2.9906646	1.24E-62	3.65E-60	up regulation
CLPS	0.091725022	0.728959612	2.990451634	2.43E-19	7.50E-19	up regulation
KLK4	0.229454504	1.822927684	2.9899773	4.33E-26	1.88E-25	up regulation
NUSAP1	2.13375031	16.92694336	2.987858209	3.31E-60	3.33E-58	up regulation
FBN2	0.134716152	1.066181304	2.984458046	5.99E-34	4.03E-33	up regulation
SKA3	0.460044874	3.637637948	2.983155463	7.60E-59	5.31E-57	up regulation
TK1	4.864898912	38.4493737	2.982478366	2.27E-60	2.46E-58	up regulation
GDF9	0.358808857	2.835398323	2.982264014	0.042264749	0.047300581	up regulation
MIR8071-2	1.16896951	9.236653194	2.9821329	6.01E-16	1.54E-15	up regulation
GTSE1	0.409961583	3.237378216	2.981265295	3.83E-58	2.34E-56	up regulation
AC026355.1	0.159870384	1.258748623	2.977015591	2.21E-05	3.17E-05	up regulation
DTL	0.848910547	6.683489538	2.976917105	9.81E-60	8.61E-58	up regulation
E2F8	0.219542438	1.728334865	2.976811016	1.03E-51	2.65E-50	up regulation
MT1H	0.10429404	0.817130882	2.969910465	3.73E-09	6.70E-09	up regulation
CDCA3	0.380157625	2.97660643	2.968998845	3.25E-60	3.30E-58	up regulation
LINC01351	0.070099654	0.547899586	2.966432287	0.001499238	0.001889032	up regulation
PIMREG	0.367045251	2.868812206	2.966423691	1.24E-54	4.38E-53	up regulation
TUBA4B	0.030598255	0.239078345	2.965962161	8.66E-12	1.79E-11	up regulation
HMMR	0.534392099	4.174023174	2.965468028	1.18E-58	7.98E-57	up regulation
NKX3-2	0.056743092	0.442786267	2.964093806	1.95E-35	1.42E-34	up regulation
HSD17B6	0.325079191	2.53147629	2.961115857	1.85E-62	4.98E-60	up regulation
COL22A1	0.158726223	1.235131306	2.960052025	4.71E-27	2.14E-26	up regulation
RDM1	0.071689605	0.557144731	2.95821629	4.23E-53	1.27E-51	up regulation
CIB3	0.116226699	0.902712718	2.957325418	3.19E-29	1.64E-28	up regulation
CCNB2	1.217974124	9.44299592	2.954761164	9.84E-59	6.76E-57	up regulation
HIST1H3G	0.085083879	0.659318181	2.954017144	2.65E-18	7.74E-18	up regulation
CDCA8	1.307756375	10.11537394	2.951383946	1.82E-61	2.99E-59	up regulation
WDR38	0.039029468	0.301510064	2.949570442	2.31E-06	3.51E-06	up regulation
MMP10	0.421173468	3.243680547	2.945145282	2.53E-25	1.06E-24	up regulation
AL033519.3	0.0564134	0.43402356	2.943663562	1.36E-14	3.27E-14	up regulation
AL139351.1	0.030461457	0.234113	2.942148192	9.99E-19	2.99E-18	up regulation
LARP1P1	0.03958836	0.30420312	2.941886729	4.70E-26	2.03E-25	up regulation
FAM72D	0.039569012	0.303765306	2.940514156	8.21E-48	1.43E-46	up regulation
MIR3153	0.137251016	1.049658591	2.935031424	2.39E-28	1.17E-27	up regulation
ANKRD30BP1	0.072996969	0.557578091	2.933265398	0.001596459	0.002007844	up regulation
RET	1.469304036	11.15936304	2.925049821	7.51E-18	2.14E-17	up regulation
FOXD1	0.098934494	0.750110534	2.922557688	0.000181555	0.000243846	up regulation
GDPD2	0.059132668	0.447586754	2.92014007	7.68E-06	1.13E-05	up regulation
HNRNPA1P21	0.198554448	1.501917221	2.919198716	7.71E-43	9.10E-42	up regulation
SYNDIG1	0.377519805	2.851524416	2.91710915	6.03E-38	5.10E-37	up regulation
FN1	39.33574233	296.7489872	2.915330391	3.58E-51	8.72E-50	up regulation
SOX11	0.267841222	2.019781059	2.914748993	2.09E-08	3.59E-08	up regulation
CDC6	0.8398086	6.323207052	2.912523994	1.52E-53	4.73E-52	up regulation
U62317.1	0.489278375	3.680466203	2.911161099	1.04E-30	5.75E-30	up regulation
WFDC21P	0.347146372	2.602951966	2.906532688	4.02E-19	1.23E-18	up regulation
OR7E62P	0.085284255	0.637335583	2.901701881	7.10E-09	1.25E-08	up regulation
AL391421.1	0.385282776	2.864509996	2.894298774	3.46E-12	7.28E-12	up regulation
MKRN3	0.038357101	0.284618274	2.891462699	8.27E-07	1.29E-06	up regulation
LAMP5	1.086750986	8.038298559	2.886868759	2.35E-42	2.72E-41	up regulation
HOXC13	0.695327687	5.13659507	2.885047406	1.64E-33	1.07E-32	up regulation
ZIC2	0.105783294	0.781376046	2.884905219	0.042021659	0.047045574	up regulation
HIST2H4A	0.044231537	0.325536271	2.879671016	1.58E-37	1.30E-36	up regulation
AC107031.1	0.035105711	0.258002866	2.877609443	5.35E-09	9.50E-09	up regulation
SCUBE3	0.454163827	3.331354826	2.874824316	1.51E-18	4.47E-18	up regulation
CLPSL1	0.487441756	3.574086733	2.874272898	1.11E-20	3.67E-20	up regulation
CDKN3	0.810731448	5.941353511	2.87349562	8.39E-62	1.61E-59	up regulation
HES6	0.675302021	4.94352722	2.871935997	1.87E-51	4.69E-50	up regulation
BUB1B	0.66806124	4.873526262	2.866913756	8.24E-58	4.71E-56	up regulation
ESM1	0.57578462	4.196246605	2.865498307	4.45E-56	1.92E-54	up regulation
BRSK2	0.059357994	0.431770962	2.86275199	1.88E-10	3.61E-10	up regulation
CD1A	0.127740524	0.928063218	2.861006811	1.75E-10	3.37E-10	up regulation
DEPDC1B	0.249294913	1.81070341	2.860624903	3.30E-55	1.25E-53	up regulation
RAMP1	2.291659997	16.62331443	2.858743142	3.55E-36	2.69E-35	up regulation
LINC01238	0.503321118	3.624863463	2.848375618	3.30E-05	4.66E-05	up regulation
GPRIN1	0.362618933	2.611463491	2.848332378	2.32E-61	3.68E-59	up regulation
AL160408.1	0.030645272	0.2206378	2.84794358	0.00081425	0.001044775	up regulation
CDCA2	0.376345876	2.708461388	2.847342455	4.72E-52	1.25E-50	up regulation
PCSK1N	0.504692874	3.625459354	2.844686177	0.000922632	0.00117935	up regulation
C10orf113	0.035193307	0.252338646	2.841988202	0.012216807	0.014270524	up regulation
GUCY1B2	0.045741386	0.327921784	2.841779762	4.33E-11	8.63E-11	up regulation
CLSPN	0.230284108	1.649419076	2.840471242	2.34E-51	5.79E-50	up regulation
VN1R48P	0.03835714	0.274266599	2.83801187	1.09E-13	2.50E-13	up regulation
TMPRSS4	0.12661945	0.904687283	2.836920158	8.63E-12	1.78E-11	up regulation
AC068473.4	0.032599766	0.232831446	2.836352396	9.44E-34	6.27E-33	up regulation
AC092920.1	0.052420928	0.372464093	2.828886565	4.46E-05	6.25E-05	up regulation
LINC00460	0.055220145	0.39188035	2.827146647	1.39E-27	6.54E-27	up regulation
SCG2	0.509899461	3.609438571	2.823489734	1.97E-22	7.09E-22	up regulation
OPRD1	0.052810193	0.373682285	2.822923844	4.35E-08	7.34E-08	up regulation
FSD1	0.039318568	0.277632065	2.819891512	1.80E-11	3.66E-11	up regulation
CDC45	0.580082605	4.092247537	2.818563151	3.84E-53	1.16E-51	up regulation
TNFRSF18	1.008997124	7.116380202	2.818221528	1.80E-39	1.69E-38	up regulation
MATN3	1.325642274	9.349090319	2.81813448	7.36E-40	7.13E-39	up regulation
IFI6	65.71974921	463.2720736	2.817460838	6.97E-38	5.87E-37	up regulation
LINC00511	0.112039902	0.788597244	2.815276045	3.16E-31	1.81E-30	up regulation
E2F7	0.138257122	0.971005971	2.812126372	9.64E-51	2.25E-49	up regulation
HS6ST3	0.252617783	1.773484999	2.81155902	6.37E-10	1.19E-09	up regulation
KLHDC7B	1.05745438	7.4015438	2.807230792	1.48E-07	2.41E-07	up regulation
COX6C	29.3946785	205.1376995	2.802965746	1.10E-48	2.09E-47	up regulation
CTXN1	3.057618394	21.28351787	2.79925636	5.73E-53	1.68E-51	up regulation
CCNA2	1.355663054	9.400528135	2.793743166	1.71E-56	7.76E-55	up regulation
FAM57B	0.074706036	0.517768831	2.793011392	1.09E-27	5.15E-27	up regulation
SALL4	0.079820516	0.553030108	2.792526522	8.52E-48	1.48E-46	up regulation
CCNE1	0.538686379	3.720504311	2.7879807	8.04E-42	8.93E-41	up regulation
ARMC3	0.061891576	0.42745696	2.78796419	2.69E-25	1.12E-24	up regulation
AL359697.1	0.149112849	1.028159018	2.785586926	7.23E-40	7.00E-39	up regulation
TUBA3D	0.657953894	4.53599854	2.785361779	4.35E-13	9.62E-13	up regulation
IGFALS	0.30195575	2.080305119	2.784386095	1.98E-14	4.70E-14	up regulation
TTK	0.559501229	3.830296979	2.775243049	9.93E-53	2.83E-51	up regulation
TMEM190	0.064767363	0.443051668	2.774136051	1.97E-27	9.16E-27	up regulation
MTFR2	0.2586638	1.768849217	2.773661003	3.18E-58	1.98E-56	up regulation
ERCC6L	0.255923778	1.746798038	2.770926718	1.47E-56	6.84E-55	up regulation
MNX1-AS1	0.214799456	1.458057614	2.762985483	3.28E-12	6.92E-12	up regulation
BX324167.1	0.040982626	0.277774686	2.760830802	6.87E-20	2.17E-19	up regulation
KNL1	0.231443472	1.567401535	2.759643036	2.28E-56	1.02E-54	up regulation
F12	0.509565071	3.450882661	2.759627125	1.11E-46	1.75E-45	up regulation
AL160408.4	0.033506053	0.226021592	2.753966969	3.86E-05	5.44E-05	up regulation
TEDC2	0.423689617	2.85718053	2.753512517	2.35E-60	2.53E-58	up regulation
LINC00337	0.037138968	0.250366093	2.753033548	8.77E-45	1.19E-43	up regulation
FAM83A	0.204928748	1.379397418	2.75084388	0.000200874	0.000269014	up regulation
MUC5B	0.803806911	5.40646716	2.74976529	0.001637247	0.002056908	up regulation
TFF1	59.36440165	399.0977154	2.749072049	7.61E-08	1.27E-07	up regulation
SPC25	0.640052044	4.297767708	2.747326385	1.39E-61	2.37E-59	up regulation
CDKN2A	0.764672302	5.127622729	2.745376595	1.76E-32	1.08E-31	up regulation
SPAG5	1.070085933	7.14920263	2.740055687	5.53E-60	5.34E-58	up regulation
NKX6-1	0.119016795	0.794940622	2.739681934	1.05E-17	2.97E-17	up regulation
SCARNA22	0.088509096	0.590841877	2.738874444	1.25E-11	2.56E-11	up regulation
F7	0.361693935	2.406713178	2.734222905	5.22E-13	1.15E-12	up regulation
AC084026.1	0.057782534	0.384326737	2.733627979	8.11E-06	1.19E-05	up regulation
JAKMIP1	0.084861184	0.564100821	2.732776332	5.29E-32	3.17E-31	up regulation
UMODL1	0.036700887	0.243377942	2.729311596	2.88E-22	1.03E-21	up regulation
NCAPH	0.798844537	5.262669028	2.719807993	1.67E-56	7.63E-55	up regulation
AC113346.1	0.046141244	0.302920562	2.714810707	6.24E-10	1.17E-09	up regulation
GNG3	0.133401002	0.875745688	2.714742477	6.89E-25	2.80E-24	up regulation
KIF26B	0.408857065	2.683943895	2.71468604	1.16E-48	2.19E-47	up regulation
AGAP1-IT1	0.168112085	1.102707633	2.713554991	1.09E-37	9.06E-37	up regulation
RAD54L	0.381555383	2.502361328	2.713325737	2.76E-54	9.28E-53	up regulation
RECQL4	1.139751602	7.450144369	2.708548946	7.36E-58	4.24E-56	up regulation
CENPM	0.811392554	5.303228019	2.708398812	4.32E-57	2.16E-55	up regulation
AC099850.3	1.279528004	8.362339894	2.708294962	3.86E-42	4.40E-41	up regulation
PRR11	0.873069417	5.692554207	2.704907853	2.59E-48	4.75E-47	up regulation
MIR4526	0.10221492	0.666371217	2.704720285	2.56E-10	4.89E-10	up regulation
SMCR2	0.058151092	0.378888644	2.703895708	1.14E-30	6.31E-30	up regulation
FAM111B	1.082171752	7.050953417	2.703888861	1.01E-49	2.09E-48	up regulation
DLL3	0.043226146	0.280774207	2.699434281	4.78E-05	6.68E-05	up regulation
AL133387.1	0.22201709	1.440731246	2.698058603	6.64E-07	1.04E-06	up regulation
CLDN9	0.13664387	0.885901503	2.69672557	6.69E-21	2.23E-20	up regulation
HIST1H2BC	1.659484887	10.72265441	2.691854696	1.16E-35	8.51E-35	up regulation
AC120498.10	0.161089904	1.035716328	2.684690938	8.45E-06	1.24E-05	up regulation
KISS1	0.073610784	0.471784651	2.680139431	6.26E-20	1.98E-19	up regulation
PACSIN1	0.165926679	1.061491229	2.677474674	1.76E-52	4.86E-51	up regulation
SNORD67	0.130400774	0.832717132	2.674874068	6.35E-07	1.00E-06	up regulation
RN7SKP180	0.040937657	0.261093879	2.673068204	0.019972664	0.022956857	up regulation
C19orf33	4.749332404	30.26909488	2.672048897	1.15E-11	2.37E-11	up regulation
LRFN2	0.049409921	0.314727563	2.671230871	7.03E-31	3.93E-30	up regulation
ADAMDEC1	0.666929327	4.244332019	2.669931723	8.98E-29	4.49E-28	up regulation
SAMD11	0.437497579	2.781640605	2.668589094	4.72E-16	1.22E-15	up regulation
MIR3150BHG	0.035580958	0.226086988	2.667700688	9.29E-28	4.42E-27	up regulation
HIST2H2BF	0.194834397	1.235335876	2.664583047	2.59E-24	1.02E-23	up regulation
U62317.4	0.104112075	0.659789715	2.663868881	2.73E-20	8.82E-20	up regulation
AC138409.1	0.034984973	0.221626973	2.663326209	0.001486181	0.001873472	up regulation
GCNT3	0.039326802	0.248979719	2.66244346	1.60E-05	2.31E-05	up regulation
CBX2	0.760198493	4.805547046	2.660252601	1.70E-24	6.80E-24	up regulation
CDSN	0.049534788	0.312590004	2.657757651	0.000734569	0.000946138	up regulation
AL592494.3	0.071140528	0.44848315	2.656310193	7.85E-16	2.00E-15	up regulation
AMH	0.150712773	0.949701926	2.655673088	2.04E-19	6.32E-19	up regulation
LYPD8	0.072181343	0.454671468	2.655126577	0.034018393	0.03834259	up regulation
BICDL1	0.770786768	4.849409001	2.653405226	1.13E-57	6.33E-56	up regulation
NOTUM	0.060841094	0.382594324	2.652697473	1.59E-23	6.00E-23	up regulation
ESPL1	0.365589888	2.297220266	2.651591122	9.13E-54	2.92E-52	up regulation
TNFRSF9	0.093883838	0.589443619	2.650405095	6.54E-40	6.36E-39	up regulation
CFAP45	0.403072204	2.523490018	2.646310178	5.37E-45	7.37E-44	up regulation
ESCO2	0.165256795	1.034533238	2.6461985	4.44E-54	1.46E-52	up regulation
AC006270.1	0.064623344	0.404047546	2.644397764	0.00043916	0.000574267	up regulation
HOXB9	0.179674982	1.121990863	2.642599484	5.66E-21	1.89E-20	up regulation
INHA	0.296214558	1.849534558	2.642447803	2.72E-08	4.63E-08	up regulation
MAPK8IP2	0.975062608	6.084507485	2.641573726	1.24E-34	8.67E-34	up regulation
AC073283.2	0.07859974	0.489409665	2.638446143	8.05E-06	1.18E-05	up regulation
CAPN9	0.577762333	3.592097494	2.636278452	1.31E-23	4.97E-23	up regulation
IL4I1	0.759307149	4.715244323	2.63457703	3.47E-42	3.96E-41	up regulation
AC027698.1	0.041953127	0.260429626	2.634043317	0.001254518	0.001589548	up regulation
HOTAIR	0.499132106	3.096737064	2.633255282	3.65E-17	1.00E-16	up regulation
MCIDAS	0.168350669	1.043679948	2.632138003	1.10E-11	2.27E-11	up regulation
AC093904.4	0.074682284	0.460043758	2.622933129	1.49E-07	2.44E-07	up regulation
FSIP1	1.100778709	6.772104952	2.621079861	1.57E-12	3.37E-12	up regulation
AMZ1	0.113720434	0.699398227	2.620622629	1.01E-23	3.87E-23	up regulation
COX6CP1	2.68853603	16.51074151	2.618512203	0.000666788	0.000861709	up regulation
RPLP0P2	0.186839931	1.147401195	2.618495204	9.02E-58	5.14E-56	up regulation
RDH16	0.167864185	1.026239133	2.61200059	1.80E-21	6.18E-21	up regulation
E2F1	1.615605431	9.868268847	2.610722119	2.45E-54	8.36E-53	up regulation
PYY	0.170152939	1.039181694	2.610543947	3.14E-07	5.04E-07	up regulation
AP005131.1	0.054777391	0.333362328	2.605438611	0.025792654	0.029378578	up regulation
MND1	0.464074611	2.821766481	2.604169925	2.38E-49	4.81E-48	up regulation
CDIPTOSP	0.10677805	0.648216411	2.601860439	1.50E-22	5.41E-22	up regulation
KCNE4	3.376659336	20.47581384	2.600252253	1.15E-10	2.23E-10	up regulation
IGFBPL1	0.089964416	0.545496628	2.600143887	1.64E-14	3.92E-14	up regulation
HIST1H2BD	8.693465335	52.68212878	2.599310368	3.28E-46	4.96E-45	up regulation
C6orf99	0.2582862	1.564875466	2.599005381	1.56E-55	6.21E-54	up regulation
KIAA1211	0.19194058	1.160061066	2.595469088	1.30E-35	9.56E-35	up regulation
PRC1	1.801231375	10.8750939	2.59397244	1.47E-58	9.79E-57	up regulation
RN7SL521P	0.126474698	0.762559104	2.592000362	4.23E-13	9.36E-13	up regulation
MAPK15	0.971303848	5.846450863	2.589566508	1.04E-22	3.79E-22	up regulation
RMI2	1.120428808	6.74174468	2.589071008	5.66E-59	4.12E-57	up regulation
SLC8A2	0.057998859	0.348504784	2.587082031	0.005121529	0.006184815	up regulation
VSTM2L	0.519771122	3.122009478	2.58652653	3.03E-10	5.78E-10	up regulation
MIR4653	0.680779329	4.088197657	2.586205812	3.33E-40	3.32E-39	up regulation
ELAVL2	0.122395591	0.734621773	2.585450069	5.26E-21	1.77E-20	up regulation
ENTPD8	0.260850549	1.564755183	2.584641582	5.52E-18	1.59E-17	up regulation
GP2	2.005414309	12.01117301	2.582404824	5.05E-05	7.03E-05	up regulation
HIST1H4H	3.730539842	22.30880194	2.580156717	1.08E-36	8.49E-36	up regulation
RHBDL1	0.433250383	2.588283127	2.578722509	9.77E-33	6.11E-32	up regulation
CKS2	9.654118283	57.59099944	2.576626951	5.30E-63	1.85E-60	up regulation
ZBED2	0.097302719	0.57864046	2.572115173	1.52E-17	4.26E-17	up regulation
CENPE	0.393001844	2.33500658	2.570818627	2.36E-53	7.25E-52	up regulation
SNORA14B	0.416625439	2.475276765	2.570767008	0.000571531	0.000742022	up regulation
HSH2D	1.119376866	6.646622386	2.569925555	5.16E-33	3.27E-32	up regulation
IL21R	0.172815092	1.025530533	2.569069322	1.52E-45	2.18E-44	up regulation
RHBG	0.068451238	0.405447562	2.566366795	9.78E-25	3.95E-24	up regulation
HIST1H2BJ	0.685469927	4.051115687	2.563154007	6.59E-34	4.41E-33	up regulation
KIF23	0.807647729	4.765514868	2.560834016	1.26E-57	6.97E-56	up regulation
PAQR4	2.125212078	12.52612665	2.559261649	1.48E-60	1.73E-58	up regulation
CST6	0.970154177	5.699317063	2.554503111	5.52E-16	1.42E-15	up regulation
CLGN	1.197666913	7.032213234	2.553752085	5.45E-18	1.56E-17	up regulation
PNCK	0.09196808	0.538676311	2.550213491	4.83E-13	1.07E-12	up regulation
POLQ	0.169593469	0.990904646	2.546665619	2.89E-51	7.11E-50	up regulation
LNCAROD	0.070707634	0.413047424	2.546369549	6.78E-07	1.07E-06	up regulation
S100A14	30.60070756	178.7428613	2.546248707	1.36E-36	1.06E-35	up regulation
HMGN2P30	0.041369609	0.241424118	2.544926563	0.003105351	0.003818196	up regulation
EME1	0.301334945	1.754799397	2.541866221	7.77E-56	3.23E-54	up regulation
APLP1	0.75041296	4.369013993	2.541551077	6.16E-16	1.58E-15	up regulation
TMEM92	0.077473045	0.450375184	2.539360984	5.02E-39	4.59E-38	up regulation
SERPINA9	0.081102209	0.469668634	2.533830134	5.26E-15	1.29E-14	up regulation
KCNK15	1.231416438	7.12281074	2.532127925	7.63E-20	2.40E-19	up regulation
GAL	0.488171568	2.817112273	2.528756884	0.006888566	0.008221753	up regulation
SHCBP1	0.507214222	2.925980777	2.528253187	1.08E-54	3.86E-53	up regulation
FLJ33534	0.050038401	0.288483574	2.527381589	1.78E-09	3.25E-09	up regulation
AC083906.3	0.208792685	1.203057792	2.526562876	1.35E-10	2.61E-10	up regulation
AC108860.1	0.051329038	0.295285897	2.524265323	5.22E-12	1.09E-11	up regulation
RAD51	0.605841022	3.480069274	2.522104852	2.20E-57	1.16E-55	up regulation
ZWINT	3.31911071	18.98970667	2.516348964	2.06E-60	2.28E-58	up regulation
DLX5	0.252386936	1.441662229	2.514024048	3.47E-15	8.56E-15	up regulation
RNU4-25P	0.058422939	0.332716421	2.509686225	0.000123385	0.0001676	up regulation
AC138904.1	0.109988805	0.625453217	2.507545281	5.31E-38	4.51E-37	up regulation
TINCR	0.874895116	4.966762878	2.505123891	2.49E-18	7.29E-18	up regulation
GPR158	0.06718747	0.381147652	2.504085886	0.001353161	0.001709441	up regulation
E2F2	0.376705206	2.133328561	2.501598301	6.30E-48	1.11E-46	up regulation
SIX2	0.785090843	4.445282179	2.501343498	6.44E-19	1.94E-18	up regulation
TRIP13	1.101384418	6.226927215	2.499202313	5.28E-55	1.94E-53	up regulation
SLC7A5	5.083409548	28.73826352	2.499104519	8.23E-30	4.34E-29	up regulation
KIF15	0.448606483	2.533013955	2.49733265	3.95E-53	1.19E-51	up regulation
CCNB1	3.813413179	21.52608377	2.496931116	4.53E-62	9.76E-60	up regulation
GBP5	0.692358585	3.908010062	2.496842848	1.35E-18	4.01E-18	up regulation
CFB	2.314904248	13.06258964	2.496416512	1.10E-22	4.00E-22	up regulation
PROC	0.069926394	0.393890949	2.493887253	2.19E-50	4.92E-49	up regulation
APOBEC3B	1.095570311	6.169760641	2.493532445	1.91E-33	1.25E-32	up regulation
CDH2	0.494066385	2.753557518	2.478519938	1.36E-24	5.44E-24	up regulation
LINGO1	0.951055539	5.294752865	2.476961849	7.24E-27	3.26E-26	up regulation
AP000251.1	0.164799974	0.917013533	2.476227007	8.82E-38	7.38E-37	up regulation
LINC02195	0.057577243	0.320189591	2.475355797	3.83E-17	1.05E-16	up regulation
AC017002.3	0.047319218	0.263004446	2.474589039	6.63E-38	5.58E-37	up regulation
AL365356.5	0.063902373	0.355088235	2.474236148	2.06E-32	1.27E-31	up regulation
AL121906.2	0.157804415	0.876147805	2.473036705	3.74E-45	5.22E-44	up regulation
P4HA3	0.475952722	2.64109425	2.472245608	3.79E-48	6.82E-47	up regulation
ATP5MC1P4	0.119821531	0.664567012	2.471527506	1.07E-41	1.17E-40	up regulation
KCNF1	0.748167906	4.143255167	2.469330687	4.35E-11	8.67E-11	up regulation
CPNE7	0.626650402	3.467012514	2.467960327	3.51E-25	1.45E-24	up regulation
KRT31	0.118339343	0.653059939	2.464285618	7.03E-05	9.72E-05	up regulation
GATA3-AS1	0.92596642	5.103085032	2.4623379	1.89E-13	4.25E-13	up regulation
SLC44A4	7.448749872	40.95412221	2.45893845	1.29E-24	5.19E-24	up regulation
ERMN	0.090156989	0.4956937	2.458937692	1.06E-29	5.57E-29	up regulation
UBE2S	1.607034954	8.832075587	2.45835121	3.88E-59	2.90E-57	up regulation
ZMYND10	0.725978742	3.989848696	2.458334828	7.21E-26	3.09E-25	up regulation
ORC6	0.358055424	1.964703818	2.456057015	5.92E-47	9.52E-46	up regulation
AC009005.1	0.475152172	2.607005431	2.455932059	1.43E-37	1.19E-36	up regulation
HIST2H3D	0.073721978	0.404039405	2.454329313	5.61E-14	1.30E-13	up regulation
DPEP1	0.113216421	0.619921084	2.453001355	2.07E-37	1.70E-36	up regulation
CTHRC1	10.35728661	56.62993473	2.45091877	1.26E-50	2.89E-49	up regulation
AKR7A3	3.077708375	16.81426043	2.449756882	6.65E-13	1.46E-12	up regulation
IGHG3	21.66116213	118.1475096	2.447406667	1.08E-09	1.99E-09	up regulation
OTX1	0.167022733	0.905557333	2.43876151	1.06E-27	5.03E-27	up regulation
TFF3	43.88255338	237.8728433	2.438471197	6.08E-09	1.08E-08	up regulation
HIST1H4K	0.201260731	1.089842252	2.436981715	1.75E-28	8.65E-28	up regulation
KIF11	1.618304058	8.762731921	2.436898026	4.80E-57	2.39E-55	up regulation
DEGS2	3.362098415	18.17396958	2.434439708	3.65E-25	1.51E-24	up regulation
MUC1	24.10441747	130.0017853	2.431161966	1.62E-30	8.89E-30	up regulation
AC025176.1	0.065450587	0.352894443	2.430758667	4.53E-29	2.30E-28	up regulation
EDN2	0.893738032	4.808867028	2.427773112	1.09E-23	4.17E-23	up regulation
OIP5	0.519535996	2.792306857	2.426161877	2.23E-58	1.41E-56	up regulation
AC012531.4	0.076159631	0.408776533	2.424213983	2.25E-14	5.34E-14	up regulation
CELSR3	0.230183974	1.235435766	2.424160707	5.17E-32	3.10E-31	up regulation
LINC00536	0.064215837	0.344258406	2.42249083	1.05E-14	2.53E-14	up regulation
KIAA0319	0.048254596	0.258413925	2.420945536	0.00147361	0.001857751	up regulation
PAX2	0.064473334	0.345257543	2.420898435	1.93E-09	3.51E-09	up regulation
GINS1	0.963938845	5.159107885	2.42010809	1.08E-57	6.11E-56	up regulation
AL023693.1	0.098651888	0.527926841	2.419919448	1.56E-06	2.40E-06	up regulation
TMPRSS6	0.43708492	2.33361909	2.416583583	6.72E-08	1.12E-07	up regulation
HIST1H4J	0.121508555	0.647447762	2.413705907	1.29E-31	7.51E-31	up regulation
AC026355.3	0.040785461	0.217122392	2.412381669	5.56E-08	9.34E-08	up regulation
AC019117.1	0.086824084	0.462015571	2.411774285	1.12E-06	1.73E-06	up regulation
AC098934.1	0.284357538	1.512926122	2.411563584	6.83E-39	6.18E-38	up regulation
HOXC10	3.449589505	18.32848072	2.409590604	1.72E-20	5.61E-20	up regulation
FAM72A	0.07691681	0.408220885	2.407979163	2.86E-48	5.21E-47	up regulation
LY6H	0.088871987	0.471064906	2.406125209	1.82E-30	9.94E-30	up regulation
JPH3	0.053641194	0.283848604	2.403708401	7.59E-14	1.75E-13	up regulation
CACNA1H	0.992068379	5.238149807	2.400545853	1.47E-08	2.55E-08	up regulation
MMP12	0.764920781	4.032587716	2.398323667	1.11E-05	1.62E-05	up regulation
SLC16A6	2.101886643	11.07090193	2.397015991	7.94E-18	2.26E-17	up regulation
SPIB	0.311048945	1.637032545	2.395869484	0.000158223	0.000213375	up regulation
NT5CP2	0.056182867	0.295548007	2.395190332	5.46E-06	8.13E-06	up regulation
SMIM22	5.867430176	30.80580874	2.392401738	4.73E-38	4.03E-37	up regulation
AL356417.2	0.18941628	0.993780465	2.391366849	4.18E-28	2.02E-27	up regulation
CCL20	0.217113929	1.136845214	2.388511646	1.72E-12	3.68E-12	up regulation
LGALS8-AS1	0.088438081	0.462800961	2.387652233	1.40E-40	1.43E-39	up regulation
PAFAH1B3	8.834900019	46.15452217	2.385186295	1.05E-61	1.95E-59	up regulation
CCNE2	0.413860232	2.159167682	2.383259758	1.28E-49	2.62E-48	up regulation
CDT1	1.066426326	5.551493568	2.380091664	1.22E-46	1.92E-45	up regulation
AL022316.1	0.184029445	0.955981873	2.377046645	1.50E-25	6.33E-25	up regulation
CCNO	1.522678432	7.905599053	2.37626349	1.55E-08	2.69E-08	up regulation
ADAMTS19-AS1	0.055282299	0.286621166	2.374255637	4.90E-07	7.77E-07	up regulation
DNAAF3	0.244125515	1.26459394	2.372979221	3.73E-27	1.71E-26	up regulation
LMNB1	3.553233914	18.39765943	2.372317665	1.04E-56	4.92E-55	up regulation
IGHGP	5.631593771	29.14386298	2.371576942	6.47E-10	1.21E-09	up regulation
KCNJ10	0.051401174	0.265759827	2.370249815	2.77E-29	1.42E-28	up regulation
WDR62	0.290749866	1.503021939	2.370015638	4.28E-60	4.24E-58	up regulation
SPEF1	0.307544861	1.589086095	2.369328516	3.59E-24	1.41E-23	up regulation
PLEKHD1	0.14638025	0.755816236	2.368314597	1.20E-16	3.21E-16	up regulation
TSPAN1	8.60766972	44.34681614	2.365135903	3.67E-16	9.52E-16	up regulation
NXPH4	0.659042643	3.394102038	2.364586214	5.50E-13	1.21E-12	up regulation
BMP8A	0.162710125	0.837827788	2.364349706	7.75E-49	1.49E-47	up regulation
FGFR3	1.399720067	7.197268158	2.362311083	9.82E-19	2.94E-18	up regulation
BGN	63.78725301	327.6811326	2.360952552	3.23E-54	1.08E-52	up regulation
HMGB3	4.210773841	21.58417235	2.357816477	2.11E-53	6.49E-52	up regulation
KIF18A	0.398682502	2.034305687	2.35122429	2.00E-50	4.51E-49	up regulation
HAGLROS	0.179699036	0.915501514	2.348979604	1.44E-23	5.47E-23	up regulation
UBE2SP1	0.137152009	0.698189142	2.347842163	1.02E-37	8.51E-37	up regulation
OASL	1.238148174	6.300909846	2.347376189	5.51E-29	2.79E-28	up regulation
METRN	3.134889503	15.9267279	2.344963402	4.09E-37	3.29E-36	up regulation
BCAS1	1.122828364	5.699758687	2.343763427	1.84E-13	4.16E-13	up regulation
FBXO43	0.064881086	0.329310953	2.343580629	3.00E-50	6.60E-49	up regulation
H2AFZP4	0.084617955	0.429148945	2.342442723	0.000807307	0.001036369	up regulation
MFAP2	3.138560653	15.90278819	2.341104737	7.96E-47	1.27E-45	up regulation
GDF15	2.246773074	11.37596113	2.340062117	8.08E-17	2.18E-16	up regulation
CABP7	0.048621407	0.246138153	2.339804743	2.60E-18	7.60E-18	up regulation
C20orf204	0.093764412	0.474392091	2.338967595	6.40E-37	5.10E-36	up regulation
LINC00940	0.127125851	0.642954212	2.338458571	9.14E-18	2.59E-17	up regulation
TLCD1	2.10512101	10.64328416	2.337968315	4.59E-55	1.71E-53	up regulation
SLC5A5	0.046725054	0.235919909	2.336028938	1.60E-07	2.61E-07	up regulation
MINDY4B	0.099347955	0.50043184	2.33261141	1.73E-19	5.38E-19	up regulation
DOK7	0.530142767	2.667863829	2.331232198	1.50E-13	3.39E-13	up regulation
AC093904.2	0.080712973	0.405781902	2.329832047	5.02E-06	7.49E-06	up regulation
AL132708.1	0.086982056	0.437130967	2.329275865	1.10E-05	1.61E-05	up regulation
GPRC5A	8.653154805	43.44693602	2.327956321	1.97E-39	1.85E-38	up regulation
AGR2	44.89321933	225.3119644	2.327354463	1.37E-16	3.65E-16	up regulation
FAM72B	0.089194788	0.446105151	2.322352489	1.57E-39	1.48E-38	up regulation
SNORA71A	0.695659983	3.47846586	2.321996922	0.001216788	0.001542903	up regulation
PRDX1P1	0.201443092	1.00606272	2.320276014	9.53E-18	2.70E-17	up regulation
HIST1H1C	29.49491357	146.8871683	2.316170284	5.99E-30	3.18E-29	up regulation
AC037198.2	2.70689692	13.44948831	2.312839431	2.96E-05	4.20E-05	up regulation
AC092803.1	0.063594618	0.315946742	2.312704803	8.31E-14	1.91E-13	up regulation
TACC3	1.569264145	7.794680632	2.3124017	6.94E-59	4.89E-57	up regulation
LINC02321	0.136230292	0.676401167	2.311831618	1.93E-29	9.99E-29	up regulation
CACNG4	6.034225863	29.90935117	2.309356011	4.72E-20	1.51E-19	up regulation
SLC16A3	1.093745353	5.417101218	2.30824416	7.10E-49	1.37E-47	up regulation
PIF1	0.153312502	0.759006178	2.307636282	7.79E-42	8.68E-41	up regulation
RCOR2	0.497909675	2.46367761	2.306857527	2.31E-15	5.75E-15	up regulation
CENPU	1.85010342	9.152967218	2.306633594	1.81E-55	7.12E-54	up regulation
PPM1E	0.107763036	0.530747462	2.300163159	5.42E-06	8.07E-06	up regulation
AC093838.1	0.53474614	2.630679417	2.298509378	0.000908655	0.001162126	up regulation
AC120498.4	1.239480202	6.08908665	2.296490615	5.72E-12	1.19E-11	up regulation
SIM2	0.273856299	1.342880633	2.293840104	6.32E-10	1.18E-09	up regulation
AL355312.3	0.091177043	0.446713364	2.292606897	5.29E-11	1.05E-10	up regulation
ADAMTS19	0.096453447	0.471904719	2.290590903	0.014404871	0.01672382	up regulation
RUFY4	0.066332976	0.323834235	2.287457359	1.13E-17	3.18E-17	up regulation
SBK1	1.830931813	8.932708439	2.28651961	1.13E-51	2.89E-50	up regulation
PRR15	4.220906164	20.56636472	2.284662146	3.21E-26	1.40E-25	up regulation
HIST1H2BG	2.318830336	11.29390243	2.284074902	7.60E-29	3.82E-28	up regulation
MNX1-AS2	0.13349217	0.649820398	2.283285908	2.00E-08	3.44E-08	up regulation
STMND1	0.841882543	4.092612246	2.281331114	5.93E-11	1.17E-10	up regulation
CREB3L1	4.143315337	20.13514995	2.280858687	9.83E-36	7.26E-35	up regulation
KCNH2	0.21199144	1.029470021	2.279823904	0.000126344	0.000171519	up regulation
AL356234.2	0.073151563	0.354025099	2.274891047	0.00545689	0.006570106	up regulation
GPR19	0.148649466	0.718810198	2.273696599	2.94E-35	2.12E-34	up regulation
MAPT-IT1	0.080797142	0.390396601	2.272564334	0.000466187	0.000608879	up regulation
SRMS	0.832421986	4.017577515	2.270938885	8.92E-35	6.25E-34	up regulation
AGR3	21.63451741	104.1759714	2.267615708	7.59E-15	1.85E-14	up regulation
CYP21A2	0.240812724	1.157213274	2.264671248	3.02E-16	7.88E-16	up regulation
LRRC31	0.451158421	2.162074898	2.260710481	0.011597775	0.013579956	up regulation
AC133540.1	0.046393309	0.221646075	2.256269149	8.34E-06	1.23E-05	up regulation
SPP1	25.40168876	121.342239	2.256085518	3.48E-27	1.59E-26	up regulation
UNC5A	0.451989226	2.157086626	2.254723826	4.69E-08	7.89E-08	up regulation
PYCR1	7.939067551	37.84658382	2.253121606	5.44E-58	3.24E-56	up regulation
COL1A1	157.2036761	743.990381	2.242649015	2.67E-38	2.32E-37	up regulation
PSCA	1.552756334	7.347960155	2.242512351	4.58E-05	6.40E-05	up regulation
AL021807.1	0.388506167	1.838308287	2.242369324	1.33E-27	6.29E-27	up regulation
TGM3	0.11008865	0.519764382	2.23919203	0.000326804	0.000430749	up regulation
AC124319.1	0.16653345	0.785505818	2.237809974	5.40E-26	2.33E-25	up regulation
DIAPH3	0.360726951	1.69900053	2.235707184	2.56E-46	3.91E-45	up regulation
NUAK2	0.768792979	3.619829588	2.235254715	7.50E-58	4.30E-56	up regulation
EZH2	1.340859148	6.312203365	2.234985991	7.23E-58	4.19E-56	up regulation
DNASE1L2	0.161686631	0.758711891	2.230351751	4.57E-34	3.10E-33	up regulation
SCX	0.282547611	1.324473468	2.228853046	9.46E-31	5.26E-30	up regulation
NPTX2	0.318963223	1.493243832	2.226987768	2.69E-17	7.45E-17	up regulation
EEF1A2	11.94987364	55.8708893	2.225101421	8.77E-20	2.76E-19	up regulation
B4GALNT2	0.13168461	0.615109098	2.223755563	0.000115384	0.000157043	up regulation
MMP3	1.675205527	7.819443691	2.222727865	1.38E-25	5.83E-25	up regulation
SERPINA12	0.090768712	0.423364586	2.221633606	5.96E-07	9.40E-07	up regulation
U91319.1	0.075315509	0.350955079	2.220267508	7.04E-07	1.11E-06	up regulation
AC015883.1	0.048811189	0.227113153	2.218127463	0.000286161	0.000378957	up regulation
SERPINC1	0.060636541	0.281765243	2.216234295	1.14E-13	2.60E-13	up regulation
SMC1B	0.115887023	0.538401679	2.215963882	0.00039159	0.000513403	up regulation
ATP2A1-AS1	0.313327824	1.455456847	2.215727274	1.13E-43	1.41E-42	up regulation
CYSRT1	0.418273384	1.941573526	2.21470824	1.85E-37	1.52E-36	up regulation
ADAM8	1.124628236	5.219595395	2.214489804	1.62E-46	2.53E-45	up regulation
SQLE	5.609339675	26.02007945	2.213722513	1.22E-50	2.82E-49	up regulation
RAD51AP1	1.140735733	5.291395622	2.213683678	5.81E-51	1.39E-49	up regulation
CENPI	0.340880267	1.581159486	2.213645905	2.11E-49	4.27E-48	up regulation
CD80	0.10012319	0.464224434	2.213046295	2.08E-38	1.82E-37	up regulation
SDS	0.925215766	4.269818243	2.206312903	5.59E-48	9.88E-47	up regulation
C1orf194	0.149231205	0.688053109	2.204970689	3.57E-15	8.82E-15	up regulation
RHPN1	2.650659298	12.21762357	2.204540545	5.88E-47	9.45E-46	up regulation
ARHGAP11A	0.801241186	3.685489057	2.201547589	1.06E-50	2.46E-49	up regulation
HIST1H2AG	0.465023181	2.138961894	2.20153624	4.17E-25	1.71E-24	up regulation
LINC02593	0.305705079	1.402517829	2.197806682	4.08E-08	6.89E-08	up regulation
ORC1	0.505373114	2.317527201	2.197165453	1.19E-43	1.49E-42	up regulation
OR7E91P	0.190133773	0.867238234	2.189413548	4.77E-18	1.38E-17	up regulation
LINC01775	0.069440452	0.316140788	2.186718946	1.52E-31	8.83E-31	up regulation
AL365436.2	0.097925659	0.445240844	2.184827102	9.98E-18	2.83E-17	up regulation
AL645608.6	0.119376243	0.541551284	2.181582204	3.31E-11	6.66E-11	up regulation
AC068137.1	0.051864944	0.234845964	2.178883149	8.43E-17	2.27E-16	up regulation
GRIN2D	0.209136686	0.94593771	2.17729903	4.58E-39	4.20E-38	up regulation
MGAT5B	0.118133522	0.533288367	2.174497455	0.012355183	0.014427615	up regulation
AUNIP	0.423414001	1.910994645	2.174182855	3.50E-50	7.66E-49	up regulation
RNU6-875P	0.070996702	0.32033771	2.173769719	2.24E-10	4.29E-10	up regulation
SPOCD1	0.180897568	0.81513963	2.171874199	5.41E-35	3.84E-34	up regulation
RUNDC3A-AS1	0.062543866	0.281792336	2.171692065	3.62E-19	1.11E-18	up regulation
AL645924.1	0.172094938	0.774730161	2.170489243	3.13E-17	8.63E-17	up regulation
C1QTNF6	1.529899826	6.874382501	2.167792936	5.40E-55	1.98E-53	up regulation
SYN1	0.237846996	1.067734719	2.16644754	3.41E-16	8.88E-16	up regulation
AL139412.1	0.139242863	0.624339881	2.164728242	1.54E-32	9.49E-32	up regulation
CYP21A1P	0.444767812	1.994209601	2.164692762	8.32E-15	2.02E-14	up regulation
C1orf189	0.174158859	0.780156462	2.163359628	5.01E-18	1.44E-17	up regulation
NIPAL4	0.064496474	0.288514098	2.161349625	3.60E-09	6.46E-09	up regulation
JPT1	8.13069877	36.33657593	2.159971227	5.84E-59	4.23E-57	up regulation
HIST1H3A	0.115621324	0.51667188	2.159840862	2.40E-05	3.43E-05	up regulation
AL592071.1	0.048907965	0.218365379	2.158602792	5.71E-23	2.10E-22	up regulation
LINC02130	0.089109301	0.395730875	2.150871695	1.81E-10	3.49E-10	up regulation
LYPD1	0.156798803	0.696287856	2.150769314	4.71E-35	3.36E-34	up regulation
DISP3	0.072469115	0.321781237	2.15064203	1.60E-10	3.09E-10	up regulation
OLR1	1.651657497	7.322714168	2.148463936	1.14E-41	1.25E-40	up regulation
LINC00578	0.335929588	1.488963502	2.148077613	1.72E-05	2.48E-05	up regulation
TMEM171	0.084060505	0.370840069	2.141297098	4.38E-14	1.02E-13	up regulation
AL031663.3	0.051289068	0.226263919	2.141283283	7.66E-09	1.35E-08	up regulation
CHST6	0.101777656	0.448867122	2.140867558	2.60E-21	8.87E-21	up regulation
LTB	1.744687932	7.693866266	2.140739745	4.25E-14	9.93E-14	up regulation
HS3ST6	0.078684798	0.346850393	2.140156683	0.025396694	0.028943579	up regulation
HPN	3.262819626	14.33453587	2.135304052	3.35E-28	1.63E-27	up regulation
PARD6B	2.881327187	12.64553361	2.133822517	2.32E-22	8.31E-22	up regulation
SAPCD2	1.38400729	6.073329892	2.133636194	4.31E-44	5.53E-43	up regulation
LINC01293	0.056895357	0.249590991	2.133183036	0.004130692	0.005028905	up regulation
SLC7A11	0.261790503	1.146460161	2.130701555	2.00E-22	7.18E-22	up regulation
LINC01087	0.868261662	3.800795747	2.13009971	0.000162613	0.000219119	up regulation
CSMD2	0.051451731	0.224773476	2.127180291	1.46E-31	8.50E-31	up regulation
AC016866.3	0.04944241	0.215616707	2.124647983	5.11E-11	1.02E-10	up regulation
TYMSOS	0.312170046	1.361044076	2.124309773	1.48E-37	1.22E-36	up regulation
BRIP1	0.376323847	1.639493729	2.123203765	1.05E-42	1.23E-41	up regulation
RGS7	0.063113609	0.27457947	2.121200727	0.000115801	0.000157588	up regulation
AC093642.2	0.210784691	0.916649135	2.120599534	1.88E-08	3.24E-08	up regulation
KPNA2	12.17236745	52.91624276	2.120100838	6.04E-58	3.59E-56	up regulation
RNU6ATAC14P	0.097622918	0.424107484	2.119138165	1.88E-08	3.23E-08	up regulation
AC016825.1	0.072190294	0.31342442	2.118240803	0.02769245	0.0314555	up regulation
DYDC2	0.113254264	0.490946572	2.116000668	1.67E-10	3.21E-10	up regulation
IQANK1	4.335854264	18.78213756	2.114973092	3.57E-56	1.57E-54	up regulation
PRR36	2.095075252	9.066297633	2.113511459	1.75E-39	1.64E-38	up regulation
GPR37L1	0.058099159	0.251315151	2.112908455	6.67E-12	1.38E-11	up regulation
CCDC151	0.176824318	0.763398463	2.110119581	3.66E-16	9.49E-16	up regulation
PGLYRP2	0.621760479	2.683264826	2.109558627	0.038153559	0.042821085	up regulation
MAD2L1	1.072093812	4.625104387	2.109054776	5.16E-53	1.53E-51	up regulation
CAPS	2.687949961	11.59574188	2.109016938	6.08E-32	3.63E-31	up regulation
IDO1	1.473335976	6.349382426	2.107529818	0.010273907	0.012094013	up regulation
AP005131.2	0.191521857	0.824890335	2.106693285	1.13E-23	4.30E-23	up regulation
SSTR2	0.603719	2.596222867	2.104465123	8.40E-05	0.000115312	up regulation
RNFT2	0.268048116	1.149464357	2.100397828	5.88E-53	1.72E-51	up regulation
CDC25A	0.515268077	2.208712216	2.099810336	1.31E-41	1.43E-40	up regulation
AC124067.4	0.174429696	0.746319102	2.097146939	3.65E-13	8.12E-13	up regulation
BCAS2P2	0.069683374	0.298130263	2.097056442	0.005034248	0.006082981	up regulation
TNIP3	0.053963458	0.230575229	2.09518284	9.15E-09	1.60E-08	up regulation
C3orf67	0.129936845	0.554965058	2.094586354	9.04E-45	1.22E-43	up regulation
MYBL1	0.674646347	2.87919942	2.093464379	1.08E-23	4.12E-23	up regulation
AC084864.1	0.137080179	0.584316621	2.091730343	8.61E-34	5.72E-33	up regulation
CDKN2B-AS1	0.059474329	0.253240298	2.090167992	5.35E-39	4.89E-38	up regulation
AC004233.1	0.065795634	0.279828202	2.088477617	1.26E-30	6.94E-30	up regulation
TMEM132A	3.6117099	15.34760602	2.087259714	1.47E-44	1.96E-43	up regulation
EPN3	2.592460918	11.0114913	2.086615722	3.77E-42	4.30E-41	up regulation
AL358075.2	0.224317674	0.951816072	2.085139524	1.12E-32	6.98E-32	up regulation
IGHG4	33.54975679	142.2630166	2.084186447	2.63E-24	1.04E-23	up regulation
TAS1R3	0.183092959	0.776164723	2.083786552	2.13E-21	7.29E-21	up regulation
HSPA8P8	0.074688027	0.316317776	2.082425733	1.86E-05	2.67E-05	up regulation
AL390294.1	0.440569262	1.859242931	2.077274539	7.20E-09	1.27E-08	up regulation
AC010331.1	0.109794499	0.46282773	2.075669538	4.24E-29	2.16E-28	up regulation
FOXP3	0.592774306	2.486713197	2.068685304	7.57E-41	7.85E-40	up regulation
ALG1L	0.640128468	2.684220461	2.068069793	0.001033948	0.001318366	up regulation
PXDNL	0.46344616	1.941646374	2.066806821	1.89E-05	2.72E-05	up regulation
ADM2	0.920019958	3.852144893	2.065924907	8.32E-42	9.23E-41	up regulation
PROZ	0.066932036	0.279770447	2.063474779	1.40E-12	3.02E-12	up regulation
POSTN	55.21977286	230.2926125	2.060211273	1.07E-32	6.65E-32	up regulation
STARD10	14.73434651	61.4154245	2.059417958	7.32E-33	4.61E-32	up regulation
RPL18P10	0.059387928	0.247497242	2.059170845	4.26E-08	7.20E-08	up regulation
POC1A	1.438064514	5.991157249	2.058706301	1.39E-61	2.37E-59	up regulation
GINS2	1.646216133	6.838384564	2.054501796	4.20E-45	5.81E-44	up regulation
AARD	6.385395263	26.50861766	2.053613608	1.43E-05	2.07E-05	up regulation
KIFC2	1.374583752	5.69357801	2.050340757	4.15E-39	3.82E-38	up regulation
HIST1H2BK	22.69646097	93.99947865	2.050185397	5.24E-42	5.92E-41	up regulation
CRABP2	125.8700591	520.0122951	2.046610586	9.95E-27	4.45E-26	up regulation
TMEM132E	0.087567801	0.361517197	2.045591886	2.85E-05	4.05E-05	up regulation
EIPR1-IT1	0.082189106	0.339135493	2.044842698	1.03E-20	3.39E-20	up regulation
LRRC46	0.545458259	2.247641609	2.042871309	1.62E-27	7.59E-27	up regulation
AL096828.3	0.255024138	1.049714467	2.041291245	1.96E-40	1.98E-39	up regulation
SUSD3	12.05152104	49.54250914	2.039451695	2.84E-12	6.01E-12	up regulation
DLX4	0.137289307	0.563728917	2.037782314	5.68E-19	1.72E-18	up regulation
AC009093.1	0.18426437	0.755426219	2.035513728	2.87E-36	2.19E-35	up regulation
LINC01605	0.235769497	0.966577227	2.035507926	7.64E-32	4.54E-31	up regulation
LINC02257	0.071444774	0.292711492	2.034578993	1.08E-17	3.04E-17	up regulation
ANKRD22	1.087120838	4.453883359	2.034551465	3.28E-31	1.87E-30	up regulation
AL121829.2	0.077689727	0.3181834	2.034062825	1.50E-19	4.68E-19	up regulation
STIL	0.651703014	2.668981152	2.034002544	1.97E-48	3.64E-47	up regulation
AC124947.2	0.141814128	0.580282761	2.032754804	1.04E-25	4.42E-25	up regulation
AJM1	0.327880343	1.340391147	2.031412747	1.79E-45	2.55E-44	up regulation
TONSL	0.910302543	3.713790842	2.028474549	9.00E-50	1.87E-48	up regulation
BFSP2	0.06068948	0.247519316	2.028022741	1.87E-09	3.40E-09	up regulation
AL031848.1	0.260164957	1.060541378	2.027302353	7.90E-13	1.72E-12	up regulation
LINC01117	0.38836713	1.582173523	2.026414828	3.36E-17	9.23E-17	up regulation
AP005131.7	0.331885666	1.350167022	2.024379659	2.80E-25	1.16E-24	up regulation
LRG1	4.110887019	16.70962219	2.023157487	1.60E-08	2.77E-08	up regulation
SHISA9	0.229974527	0.933547965	2.021250079	2.28E-08	3.91E-08	up regulation
AL133215.2	0.175258907	0.711250056	2.020869097	1.46E-47	2.47E-46	up regulation
FUT7	0.075533941	0.305812192	2.017448954	5.63E-27	2.55E-26	up regulation
SPACA4	0.087909582	0.355841697	2.017143253	5.65E-15	1.38E-14	up regulation
TIGIT	0.321976442	1.300858635	2.014437154	1.24E-17	3.48E-17	up regulation
FGD3	2.777094306	11.20559345	2.012570981	4.14E-21	1.40E-20	up regulation
AP005131.6	0.111838341	0.451118844	2.012092691	2.32E-08	3.98E-08	up regulation
AC020663.2	0.21945285	0.885031421	2.011817672	2.25E-36	1.72E-35	up regulation
VMO1	1.245941428	5.023753955	2.011529559	8.41E-12	1.74E-11	up regulation
STK19B	0.608852736	2.449342775	2.008229459	5.80E-10	1.09E-09	up regulation
TH	0.05846627	0.235020012	2.007107151	0.000238781	0.000317963	up regulation
AC105219.3	0.25726683	1.028874284	1.99972935	5.03E-39	4.60E-38	up regulation
AL158211.4	0.079160362	0.316226824	1.998109644	5.84E-08	9.79E-08	up regulation
TICRR	0.319282357	1.273571904	1.995975676	2.82E-36	2.15E-35	up regulation
C9orf116	1.319191454	5.25442895	1.993880023	6.38E-36	4.77E-35	up regulation
RTKN2	0.292801558	1.165876347	1.99341965	1.07E-46	1.69E-45	up regulation
LRRC73	0.377590069	1.502436846	1.992411623	8.10E-30	4.27E-29	up regulation
HIST2H2BE	9.640173186	38.32339163	1.991094276	2.61E-31	1.50E-30	up regulation
ARNT2	2.471595035	9.821338769	1.990477314	5.70E-23	2.10E-22	up regulation
DNAJC12	5.793987804	23.01844463	1.9901618	2.07E-10	3.97E-10	up regulation
AC243772.2	0.061312663	0.243308673	1.988530787	1.31E-22	4.76E-22	up regulation
AL358075.1	0.068965091	0.273253083	1.986299582	3.42E-18	9.92E-18	up regulation
SPTSSB	2.015378501	7.983937747	1.98604966	0.000805798	0.001034503	up regulation
AL713922.2	0.068671174	0.271765126	1.98458381	1.97E-05	2.83E-05	up regulation
LINC01655	0.063294612	0.250395394	1.984053436	4.11E-13	9.10E-13	up regulation
ASCL2	0.682818902	2.700426427	1.983612342	4.00E-19	1.22E-18	up regulation
ADGRB2	1.234657307	4.881473342	1.983205991	8.74E-20	2.75E-19	up regulation
MAST1	0.085073266	0.336086653	1.982055499	2.41E-10	4.62E-10	up regulation
AC061992.1	0.191312522	0.755052089	1.980644874	1.97E-28	9.67E-28	up regulation
MIEN1	10.48813058	41.39250568	1.980612032	2.11E-39	1.97E-38	up regulation
PLA2G4C-AS1	0.056666022	0.222873129	1.975666861	2.09E-20	6.79E-20	up regulation
HIST1H4I	3.325733858	13.07246443	1.974786518	2.46E-43	3.00E-42	up regulation
CHST1	1.858768919	7.301586697	1.973862582	1.33E-23	5.06E-23	up regulation
TIGD3	0.141084213	0.553888611	1.973039316	2.07E-41	2.22E-40	up regulation
ZNF350-AS1	0.359429571	1.410077598	1.971993547	0.000163916	0.000220842	up regulation
C3orf80	0.470219801	1.844152824	1.971551018	1.61E-45	2.30E-44	up regulation
CYP4F23P	1.247071151	4.889228857	1.971063158	1.30E-12	2.81E-12	up regulation
AL357992.1	0.147687395	0.577270037	1.966699646	1.46E-22	5.27E-22	up regulation
KPNA7	0.075961051	0.296872355	1.966510986	7.57E-15	1.84E-14	up regulation
HIST3H2A	5.413449452	21.09731953	1.962439634	2.94E-21	1.00E-20	up regulation
GSDMC	0.372109977	1.449889255	1.962141732	0.002381844	0.002952926	up regulation
LAG3	0.541609378	2.107436384	1.960164458	1.38E-14	3.32E-14	up regulation
C4orf48	1.696256528	6.598348852	1.959750686	2.26E-27	1.05E-26	up regulation
SYT9	0.586904639	2.282465412	1.959394982	0.001691893	0.002122109	up regulation
MROH6	0.824002914	3.20382772	1.959075227	5.13E-31	2.89E-30	up regulation
AC233992.3	0.079695551	0.309654848	1.958089949	4.12E-23	1.53E-22	up regulation
TYMS	3.085241962	11.98557085	1.95784308	2.55E-47	4.23E-46	up regulation
HASPIN	0.290939136	1.127190215	1.953941711	1.79E-41	1.93E-40	up regulation
GTSF1	0.143779898	0.556803521	1.953306343	1.13E-08	1.97E-08	up regulation
RNF224	0.085217441	0.329799775	1.952369783	2.36E-22	8.44E-22	up regulation
TPRN	2.106943096	8.143352115	1.950471434	2.63E-48	4.81E-47	up regulation
AC009686.2	0.473923935	1.831435762	1.950247668	9.14E-34	6.07E-33	up regulation
AC110285.6	0.070844124	0.273456034	1.948588796	9.25E-08	1.53E-07	up regulation
LEF1	1.432486127	5.525136557	1.947488954	3.43E-36	2.60E-35	up regulation
CIT	0.499696703	1.925547123	1.946143824	6.46E-52	1.69E-50	up regulation
LCN12	0.286407844	1.103553973	1.946014282	1.09E-10	2.13E-10	up regulation
LAGE3	8.550437611	32.9299225	1.945328953	4.67E-56	2.00E-54	up regulation
BCAS4	1.203768854	4.632501	1.944232893	3.58E-39	3.30E-38	up regulation
COL5A1	12.35612638	47.54252116	1.943991879	2.70E-36	2.07E-35	up regulation
UNC5B	3.204451852	12.30042609	1.940558793	8.38E-52	2.18E-50	up regulation
ETV7	0.826059788	3.169768571	1.940059403	1.39E-27	6.56E-27	up regulation
SYNPR-AS1	0.176271708	0.675936799	1.93908742	5.60E-09	9.94E-09	up regulation
FBXL16	2.39741598	9.190927484	1.9387302	2.18E-22	7.81E-22	up regulation
LINC01863	0.132634003	0.508445539	1.938642571	1.69E-06	2.60E-06	up regulation
AP000553.2	0.157992675	0.605612406	1.938537082	2.47E-26	1.08E-25	up regulation
AL139246.5	0.439577353	1.684669817	1.938276897	1.40E-24	5.60E-24	up regulation
MEX3A	2.323122892	8.903273573	1.938270412	3.32E-23	1.24E-22	up regulation
C20orf144	0.057977516	0.22168454	1.934942728	1.55E-38	1.36E-37	up regulation
LINC01943	0.129401677	0.494723535	1.934766219	7.96E-40	7.68E-39	up regulation
LINC01615	0.201699882	0.770955949	1.934438194	1.38E-27	6.52E-27	up regulation
U47924.1	0.080568247	0.30793938	1.93436311	6.74E-23	2.47E-22	up regulation
AL117381.1	0.139422546	0.53282528	1.934198654	0.03163804	0.035761888	up regulation
AL049539.1	0.070488651	0.269146246	1.93292741	2.50E-09	4.53E-09	up regulation
MAL2-AS1	0.059386304	0.226751899	1.932912486	6.23E-12	1.29E-11	up regulation
BLM	0.456220981	1.741025364	1.932132519	2.69E-45	3.78E-44	up regulation
FRMPD3	0.145263518	0.553709883	1.93045785	2.35E-14	5.57E-14	up regulation
ASPN	13.32219501	50.72459433	1.928853617	1.66E-16	4.40E-16	up regulation
TMEM244	0.057037774	0.217001741	1.927717037	8.07E-19	2.42E-18	up regulation
AL035420.3	0.090526907	0.344273736	1.927137554	8.75E-19	2.62E-18	up regulation
FLJ12825	0.102361306	0.388891521	1.925697313	1.43E-11	2.93E-11	up regulation
HS3ST3A1	0.131673129	0.49984268	1.924513131	5.12E-32	3.07E-31	up regulation
TEX14	0.249682816	0.94770637	1.924343601	0.033290714	0.037545247	up regulation
TESMIN	1.823239866	6.91145414	1.922484904	1.12E-38	9.92E-38	up regulation
NPNT	8.92771385	33.83725658	1.922249912	7.63E-20	2.40E-19	up regulation
GNAQP1	0.433574315	1.636627635	1.916374919	0.003102569	0.003815063	up regulation
SLC17A9	0.557112893	2.101445574	1.915340484	1.95E-20	6.34E-20	up regulation
PTK6	2.080297039	7.843466597	1.914701886	2.88E-35	2.08E-34	up regulation
NUPR2	1.856630369	6.999511654	1.914567648	6.99E-14	1.61E-13	up regulation
LIPM	0.095635596	0.360467204	1.914248407	3.50E-23	1.31E-22	up regulation
FANCI	1.759453614	6.629702822	1.913816723	2.19E-54	7.57E-53	up regulation
AC037198.1	1.073516119	4.044334494	1.91355847	3.40E-11	6.83E-11	up regulation
GPR141	0.173561404	0.653455785	1.912643459	1.11E-23	4.24E-23	up regulation
SAMD14	0.08793964	0.33099899	1.912241292	1.10E-52	3.11E-51	up regulation
PRRT3	1.299697143	4.886160773	1.91052585	1.28E-33	8.47E-33	up regulation
AP003086.2	0.068860707	0.258722827	1.90965444	2.20E-06	3.35E-06	up regulation
ATAD2	3.541841811	13.29885703	1.908730576	2.10E-44	2.77E-43	up regulation
PCAT7	0.200424283	0.751822217	1.907334234	1.69E-16	4.47E-16	up regulation
TEX45	0.120550213	0.452178591	1.907258483	3.32E-28	1.61E-27	up regulation
TRIM59	0.488755348	1.833012409	1.907032158	2.70E-57	1.40E-55	up regulation
AC068580.1	0.364944811	1.367709714	1.90601185	2.36E-22	8.46E-22	up regulation
TNFSF4	0.567778466	2.127578041	1.905812014	7.25E-42	8.08E-41	up regulation
BTNL10	0.12586756	0.470940746	1.90363905	9.33E-15	2.26E-14	up regulation
IRF7	4.761335769	17.7797173	1.900794109	4.64E-44	5.95E-43	up regulation
PPM1J	1.044826195	3.893891753	1.897949806	1.64E-28	8.09E-28	up regulation
AL353803.5	0.198386825	0.738811527	1.89689016	6.85E-15	1.67E-14	up regulation
SULF1	8.918599549	33.19761929	1.896190692	1.45E-35	1.06E-34	up regulation
HPDL	0.445087193	1.654901285	1.894585268	0.000479234	0.000625655	up regulation
AC022432.1	0.088581954	0.32879485	1.892102971	1.84E-12	3.93E-12	up regulation
THPO	0.411015683	1.525443421	1.891963323	0.000300415	0.00039704	up regulation
FIBCD1	0.250975926	0.930740343	1.890829756	5.41E-17	1.47E-16	up regulation
GINS4	0.535478473	1.984835373	1.89011887	8.98E-35	6.30E-34	up regulation
CCDC167	7.80110954	28.86614497	1.887627215	1.60E-60	1.85E-58	up regulation
MIR3189	0.281290549	1.040602479	1.887286065	5.20E-05	7.24E-05	up regulation
SMKR1	0.964615008	3.564450167	1.885654389	1.05E-30	5.82E-30	up regulation
MIR4326	0.150299034	0.554729462	1.883948616	7.94E-11	1.56E-10	up regulation
IFI27	19.69146929	72.66698259	1.883729239	5.07E-08	8.53E-08	up regulation
CEACAM7	0.11587953	0.427611695	1.883675567	4.43E-05	6.21E-05	up regulation
SLC50A1	12.14585866	44.78886368	1.882675578	7.16E-62	1.41E-59	up regulation
RACGAP1	3.106433282	11.45300368	1.882395037	1.23E-54	4.37E-53	up regulation
AC015912.3	0.373534676	1.37700516	1.882219885	5.41E-21	1.81E-20	up regulation
BOLA2P3	0.066340502	0.244427097	1.881442397	6.50E-14	1.50E-13	up regulation
SNORA26	1.405262398	5.170029497	1.879332968	5.34E-13	1.17E-12	up regulation
FOXD2	0.166853838	0.613256473	1.877905681	1.97E-27	9.15E-27	up regulation
AC004585.1	0.233367885	0.857194691	1.877016876	1.02E-28	5.11E-28	up regulation
IGSF9	2.426283818	8.908383666	1.876415372	4.57E-41	4.80E-40	up regulation
HPX	2.029796439	7.443007273	1.874550594	7.54E-06	1.11E-05	up regulation
AIM2	0.348077877	1.275032912	1.873052461	4.94E-10	9.28E-10	up regulation
AC015813.4	0.153930236	0.562970536	1.870782775	2.88E-09	5.19E-09	up regulation
GRAMD4P8	0.350042192	1.277839946	1.868106415	0.000140768	0.00019057	up regulation
POTEKP	1.264617348	4.611521536	1.866541919	0.001132923	0.001440306	up regulation
NME1	5.947014646	21.67402559	1.865729601	1.94E-56	8.79E-55	up regulation
HIST2H2BC	1.212572242	4.416022638	1.864676865	3.03E-42	3.47E-41	up regulation
KIAA1257	0.107349513	0.3907487	1.863925426	1.86E-23	7.00E-23	up regulation
SNHG25	0.639166292	2.32527806	1.863140015	3.95E-25	1.63E-24	up regulation
ECE2	0.588039876	2.138667743	1.862726471	8.41E-50	1.76E-48	up regulation
AC026462.1	0.080802979	0.293782666	1.862268879	1.60E-25	6.73E-25	up regulation
AC008403.3	0.083105053	0.302021657	1.861643906	2.01E-19	6.23E-19	up regulation
ZG16B	9.474804398	34.39693718	1.860112043	1.72E-25	7.23E-25	up regulation
AL365181.3	0.835941158	3.034487536	1.859979595	0.009676562	0.011413318	up regulation
H2AFX	7.306148434	26.49013831	1.858272407	7.51E-53	2.17E-51	up regulation
AC004884.2	0.104274636	0.377841075	1.857391262	5.67E-06	8.42E-06	up regulation
VWA5B2	0.065569074	0.237442977	1.856493665	7.54E-05	0.000104011	up regulation
AL121790.2	0.304053798	1.099248767	1.8541194	0.002046344	0.002549606	up regulation
PYCARD	7.202173364	26.02786941	1.853552988	6.31E-30	3.34E-29	up regulation
IGHG2	70.69392989	255.3995119	1.853097519	0.000177164	0.000238086	up regulation
RBP2	0.170081472	0.611293687	1.845639677	0.000822173	0.001054283	up regulation
ECT2	3.175245821	11.38891385	1.842689974	2.41E-52	6.56E-51	up regulation
KCNK1	2.487133928	8.915285713	1.841796837	6.77E-16	1.73E-15	up regulation
DBNDD1	2.725002713	9.765574603	1.841447268	3.02E-43	3.67E-42	up regulation
AC103706.1	0.50741315	1.815266637	1.838948662	4.25E-33	2.71E-32	up regulation
SLC39A4	1.410517402	5.04430892	1.838432166	1.67E-34	1.16E-33	up regulation
NEFL	0.064513549	0.23061218	1.837794617	0.002746281	0.003389098	up regulation
PRR19	0.368430967	1.316758338	1.837524364	5.03E-55	1.86E-53	up regulation
FARSA-AS1	0.061129792	0.218459603	1.837418966	5.24E-06	7.81E-06	up regulation
FANCA	0.372803966	1.331934638	1.837034175	3.68E-40	3.65E-39	up regulation
AC011447.7	0.432120964	1.543187307	1.836406054	3.44E-29	1.76E-28	up regulation
AP000844.2	1.269227787	4.531758982	1.836120123	0.000204978	0.000274252	up regulation
CENPK	0.3990985	1.4241022	1.835235922	7.40E-46	1.09E-44	up regulation
ICOS	0.261941426	0.934059482	1.834270187	6.10E-13	1.34E-12	up regulation
LAMP3	1.157187762	4.124541256	1.833610696	4.19E-09	7.49E-09	up regulation
DLG3-AS1	0.150645384	0.535651676	1.830138685	1.17E-17	3.30E-17	up regulation
NUP210	4.934053912	17.54351762	1.830092665	2.76E-53	8.46E-52	up regulation
AC073585.1	0.175283027	0.623188702	1.829982773	4.77E-30	2.55E-29	up regulation
B4GALNT4	2.565604637	9.115486426	1.829020778	8.57E-36	6.35E-35	up regulation
AL138720.1	0.105273493	0.373643978	1.827522054	1.09E-30	6.05E-30	up regulation
CIP2A	0.776702408	2.75553461	1.826898404	3.21E-43	3.88E-42	up regulation
HES2	0.349047775	1.237905453	1.826404709	2.83E-09	5.11E-09	up regulation
LINC01213	0.143248505	0.507769953	1.825654943	1.16E-14	2.79E-14	up regulation
LINC00243	0.105839414	0.375030687	1.825131674	7.53E-19	2.26E-18	up regulation
TSACC	0.22207615	0.786731793	1.824817423	2.28E-46	3.50E-45	up regulation
SYCE3	0.590805189	2.092847249	1.824712616	2.22E-20	7.21E-20	up regulation
FAM83E	1.554579145	5.504018569	1.82396127	5.23E-08	8.79E-08	up regulation
LINC02571	0.135444865	0.47954061	1.823947303	3.00E-08	5.11E-08	up regulation
UNC5B-AS1	0.156808111	0.555140591	1.823852998	6.70E-22	2.34E-21	up regulation
OR2I1P	1.42313358	5.030077789	1.821509626	6.50E-05	9.00E-05	up regulation
PRR7	0.62901223	2.218165236	1.818206865	2.12E-32	1.30E-31	up regulation
ZNF703	18.81782455	66.33373993	1.817643014	2.31E-18	6.77E-18	up regulation
GPR84	0.294519516	1.038140048	1.817565939	2.03E-30	1.10E-29	up regulation
KLHL35	0.470252848	1.65223349	1.812908992	4.13E-29	2.11E-28	up regulation
XRCC2	0.512823261	1.797726749	1.809640143	3.30E-41	3.50E-40	up regulation
TNRC18P1	1.230661183	4.313522024	1.809432698	7.04E-05	9.74E-05	up regulation
AC105450.1	0.119091648	0.417408611	1.809388121	1.46E-19	4.53E-19	up regulation
TMEM238	1.537218015	5.387476778	1.809287957	5.96E-33	3.77E-32	up regulation
RNU1-106P	0.992364099	3.475800502	1.808403831	1.20E-23	4.58E-23	up regulation
AP001453.2	0.608617969	2.130051519	1.80727949	9.79E-36	7.24E-35	up regulation
AL590326.1	0.165725078	0.579828608	1.806834588	2.11E-11	4.29E-11	up regulation
SDC1	33.04235332	115.5968876	1.806714209	1.02E-35	7.51E-35	up regulation
CHST8	1.151597306	4.027571855	1.806274008	0.007738064	0.009191833	up regulation
HIST2H2BD	0.199416877	0.697070183	1.805516405	6.42E-31	3.60E-30	up regulation
ECM1	12.30270144	42.91830695	1.802618027	9.81E-09	1.72E-08	up regulation
KRT19	206.8371584	721.2535638	1.802011152	3.23E-36	2.45E-35	up regulation
TYMP	9.390109742	32.7307525	1.801432847	2.53E-39	2.35E-38	up regulation
COL5A2	22.5905474	78.7102139	1.800831631	3.23E-31	1.85E-30	up regulation
AL671883.1	0.188903664	0.657943976	1.800314059	9.72E-11	1.90E-10	up regulation
ROPN1L	0.213371248	0.741729748	1.797527849	8.52E-05	0.000117035	up regulation
SNRPGP9	0.076881251	0.266557628	1.79374376	2.44E-14	5.78E-14	up regulation
LTA	0.19428566	0.673015877	1.792461118	6.85E-15	1.67E-14	up regulation
SDR16C5	1.700605016	5.890022193	1.792224972	2.07E-06	3.16E-06	up regulation
LBX2	0.181987215	0.629533953	1.790447091	2.46E-39	2.29E-38	up regulation
TPD52	10.33118494	35.72977572	1.790121124	2.24E-46	3.45E-45	up regulation
EFNA3	2.647491123	9.153158297	1.789643784	1.27E-24	5.10E-24	up regulation
CCL17	0.50782204	1.750991584	1.785777234	3.29E-09	5.92E-09	up regulation
ERBB2	24.95275581	85.99941816	1.785127742	1.03E-13	2.35E-13	up regulation
RNA5SP449	0.100086969	0.344862043	1.784765194	2.44E-07	3.94E-07	up regulation
PLA2G10	0.176473931	0.607819302	1.784187408	4.25E-13	9.41E-13	up regulation
GPC2	0.223602403	0.769570267	1.783117369	3.30E-10	6.27E-10	up regulation
DCDC1	0.104081448	0.358200181	1.783053132	0.000185445	0.00024889	up regulation
PSRC1	1.250918674	4.304346808	1.782806324	4.54E-48	8.11E-47	up regulation
LINC00607	0.079351385	0.272978544	1.782460245	4.51E-18	1.30E-17	up regulation
SPATA17	0.298173506	1.022810744	1.778315242	1.23E-36	9.61E-36	up regulation
SLC9A3R1	48.50305511	166.3552086	1.77811951	5.55E-33	3.52E-32	up regulation
N4BP3	1.957907055	6.703084289	1.775512796	1.50E-37	1.24E-36	up regulation
AL583722.1	0.068649152	0.234820657	1.774245531	4.09E-18	1.18E-17	up regulation
OBP2A	0.290651349	0.992899876	1.772358637	0.000324188	0.000427544	up regulation
LINC01977	0.631561267	2.14927459	1.766855213	2.25E-15	5.61E-15	up regulation
C15orf48	6.40871197	21.79573342	1.765939414	1.60E-18	4.74E-18	up regulation
BAK1P2	0.062993053	0.214066857	1.764796814	0.001296634	0.001641116	up regulation
SOX12	3.704964214	12.58050164	1.763657937	3.36E-53	1.02E-51	up regulation
CORIN	0.207170589	0.703250742	1.763219965	5.19E-25	2.12E-24	up regulation
ULBP2	0.314492061	1.066952112	1.762399922	2.69E-10	5.14E-10	up regulation
RGS4	0.862990477	2.922529275	1.759800931	4.68E-24	1.83E-23	up regulation
AC024451.4	0.071446931	0.24177736	1.758735205	7.59E-11	1.49E-10	up regulation
PDCD1	0.323410545	1.094211629	1.758453169	6.20E-13	1.36E-12	up regulation
AC093297.2	4.613803177	15.60326329	1.757819423	4.36E-08	7.35E-08	up regulation
RN7SL180P	0.075747158	0.256050822	1.757166534	4.11E-05	5.77E-05	up regulation
FAM173A	2.308892746	7.802511146	1.756737355	5.92E-39	5.39E-38	up regulation
SLC52A2	8.21431515	27.75002967	1.75627711	2.57E-54	8.72E-53	up regulation
UBD	2.952317883	9.968943408	1.755592536	0.001827825	0.002286108	up regulation
RLN2	0.618947292	2.089038526	1.754950635	0.0166863	0.019277509	up regulation
AC004486.1	0.109903679	0.370753975	1.754222477	0.000174194	0.000234197	up regulation
TSTA3	10.10818086	34.09345707	1.753971513	1.94E-55	7.56E-54	up regulation
RNASEH2A	5.116138389	17.24309536	1.752891586	1.22E-58	8.24E-57	up regulation
CHTF18	1.179486902	3.975016031	1.752801281	7.90E-40	7.64E-39	up regulation
WASIR2	0.294960148	0.993988669	1.752709361	6.25E-18	1.79E-17	up regulation
CCNI2	0.194177393	0.653375645	1.750537432	8.18E-07	1.28E-06	up regulation
AGT	3.09114353	10.39974498	1.750335603	0.004388366	0.005331402	up regulation
PYCR3	3.223331113	10.83735594	1.749388516	9.13E-51	2.14E-49	up regulation
C2orf50	0.18944908	0.6362296	1.747737362	3.65E-07	5.83E-07	up regulation
GLYATL1	0.456719858	1.533606091	1.747546548	1.90E-06	2.90E-06	up regulation
CATSPER1	0.069898864	0.234558846	1.746609004	2.71E-35	1.96E-34	up regulation
PLPPR3	0.998970643	3.351827437	1.746433689	1.36E-05	1.97E-05	up regulation
CAPN13	2.353814989	7.890527632	1.745120847	2.59E-22	9.25E-22	up regulation
STMN1	10.74601277	36.00339715	1.744331583	2.56E-46	3.91E-45	up regulation
MT-TM	0.39249544	1.314504149	1.743770898	0.007769866	0.009228428	up regulation
ZBP1	0.274616203	0.919437814	1.743335251	5.35E-10	1.00E-09	up regulation
PMAIP1	2.634926433	8.820684569	1.743127945	9.89E-26	4.22E-25	up regulation
ESPN	1.949258921	6.516698856	1.74121559	7.47E-20	2.36E-19	up regulation
GATA3	56.6846686	189.442387	1.740728674	2.62E-24	1.03E-23	up regulation
MCM4	6.842855735	22.8678377	1.740649519	4.52E-48	8.08E-47	up regulation
FOXA1	23.89180617	79.82229478	1.740275832	2.24E-29	1.16E-28	up regulation
PKIB	4.874033431	16.27059522	1.739078978	1.70E-14	4.05E-14	up regulation
MCM2	4.420806158	14.75634366	1.738953912	1.34E-46	2.11E-45	up regulation
AP003469.2	0.406262692	1.355373123	1.73820528	2.31E-06	3.51E-06	up regulation
AL021392.1	0.239806846	0.800014323	1.738152982	3.24E-25	1.34E-24	up regulation
AC003965.2	0.189811263	0.632745587	1.737059936	7.00E-23	2.57E-22	up regulation
CLIC3	1.46587627	4.885553943	1.736758815	4.25E-11	8.47E-11	up regulation
WNT7B	1.43226911	4.767263575	1.734858805	2.30E-20	7.46E-20	up regulation
KRT8	80.66819545	268.3988868	1.7343068	4.73E-38	4.03E-37	up regulation
AC007014.2	0.088108985	0.293144394	1.73425042	5.90E-16	1.52E-15	up regulation
RIBC2	0.673619168	2.237670633	1.731992603	3.89E-39	3.59E-38	up regulation
UBBP2	0.082320333	0.273355438	1.731457349	3.59E-07	5.74E-07	up regulation
AC006449.5	0.278987995	0.92533907	1.729779063	3.27E-26	1.42E-25	up regulation
KRT8P48	0.101497126	0.336618434	1.729675306	1.01E-15	2.57E-15	up regulation
ADAMTSL2	0.678321499	2.24853602	1.728944871	2.09E-38	1.82E-37	up regulation
AL353572.1	0.141636086	0.468948955	1.727242012	1.29E-17	3.64E-17	up regulation
KRT8P41	0.089918723	0.297683766	1.727087093	0.002047526	0.002550908	up regulation
RSPH1	0.901140901	2.981446904	1.726188038	3.28E-22	1.16E-21	up regulation
SNORD104	4.115094098	13.61096559	1.725772093	3.61E-12	7.59E-12	up regulation
AC010643.1	0.226883974	0.750068855	1.725068333	0.006207767	0.007437921	up regulation
REM2	0.241884631	0.798916626	1.723725848	3.81E-26	1.65E-25	up regulation
MX1	7.903817281	26.06044591	1.721240269	1.36E-11	2.77E-11	up regulation
RHPN1-AS1	0.876133054	2.888559486	1.721128319	1.11E-45	1.60E-44	up regulation
KRT8P8	0.07229477	0.238317845	1.720923801	2.19E-19	6.78E-19	up regulation
RN7SL236P	0.068043964	0.224174096	1.720080484	3.12E-06	4.71E-06	up regulation
CCDC74A	4.406083403	14.51490223	1.719966145	5.22E-07	8.26E-07	up regulation
Z69720.2	0.181209468	0.596661845	1.719255184	6.69E-22	2.34E-21	up regulation
TMPO-AS1	0.303504485	0.998920013	1.718651328	1.84E-48	3.41E-47	up regulation
TCL1A	0.283564217	0.93320873	1.718524312	1.29E-05	1.88E-05	up regulation
C16orf71	0.270567303	0.889000284	1.716196372	7.45E-29	3.75E-28	up regulation
MYCN	0.367498488	1.207366623	1.716053605	0.000773834	0.000994708	up regulation
ARHGEF39	0.331198115	1.086621113	1.714082617	7.19E-47	1.15E-45	up regulation
FBXL6	2.628501588	8.62190773	1.713766516	2.12E-51	5.26E-50	up regulation
CDC7	1.191716314	3.908998589	1.713758219	1.22E-40	1.25E-39	up regulation
AC069120.1	1.040817806	3.413280284	1.713441338	0.001430316	0.001804645	up regulation
AC068580.3	0.408721774	1.340307724	1.713373263	1.77E-26	7.85E-26	up regulation
PLK4	0.853652221	2.79787607	1.712611722	2.07E-45	2.94E-44	up regulation
AC138696.2	0.748749514	2.453342176	1.712193398	9.79E-30	5.15E-29	up regulation
KLRG2	0.952072239	3.115584992	1.710360126	2.71E-08	4.62E-08	up regulation
CCNF	1.626706328	5.322377185	1.710116932	3.27E-55	1.25E-53	up regulation
AC073573.1	0.065779032	0.214985505	1.708539703	6.17E-10	1.16E-09	up regulation
GPR68	1.29298585	4.221917789	1.707192	2.20E-42	2.54E-41	up regulation
LDLRAD1	0.155897989	0.508904818	1.706793533	1.49E-06	2.29E-06	up regulation
HIST1H2AE	4.128223874	13.469299	1.706081653	7.26E-27	3.27E-26	up regulation
FSTL4	0.240452303	0.783629834	1.704421582	6.22E-13	1.37E-12	up regulation
C5orf46	1.095445835	3.567979836	1.703589311	4.18E-06	6.27E-06	up regulation
IER5L	2.222612019	7.22794335	1.701329067	2.58E-41	2.75E-40	up regulation
AC007255.1	0.400993881	1.303194279	1.700400049	1.97E-19	6.10E-19	up regulation
SHISAL1	0.231248895	0.75098406	1.699335815	3.09E-11	6.23E-11	up regulation
AC103769.1	0.076674865	0.248950323	1.69903225	0.007391388	0.008798073	up regulation
AC010368.1	0.104663914	0.339624191	1.698175105	6.10E-12	1.27E-11	up regulation
PANX2	0.614938469	1.995162226	1.69799209	6.24E-14	1.44E-13	up regulation
SLC38A5	0.734867681	2.383154257	1.697315929	9.32E-23	3.40E-22	up regulation
ZNF730	0.128773513	0.417599007	1.697282396	2.05E-12	4.36E-12	up regulation
LRRC10B	0.516851512	1.674646622	1.696034928	0.000768363	0.000988086	up regulation
AC005544.1	0.127211722	0.412041724	1.695558817	3.70E-08	6.28E-08	up regulation
DNA2	0.689167345	2.231418055	1.695034578	1.44E-45	2.06E-44	up regulation
GMPSP1	0.085903595	0.277736814	1.692927999	2.52E-24	9.96E-24	up regulation
ANXA9	7.564736496	24.45749118	1.692914687	9.47E-20	2.97E-19	up regulation
PLAUR	2.839118581	9.175213228	1.692298579	1.16E-41	1.27E-40	up regulation
ATG9B	0.184779964	0.596885103	1.691644915	1.06E-23	4.07E-23	up regulation
SNORD60	0.776698356	2.506624604	1.690319635	2.23E-24	8.84E-24	up regulation
AL135818.2	0.26710605	0.861676874	1.689734314	1.19E-17	3.36E-17	up regulation
B4GALNT3	1.676011809	5.403359964	1.688824481	4.07E-18	1.18E-17	up regulation
FAP	2.118331715	6.821208513	1.687098842	2.92E-30	1.58E-29	up regulation
FAM83H	8.91870084	28.68385918	1.685333662	5.94E-51	1.42E-49	up regulation
ADAM19	1.054777019	3.390797683	1.684686663	1.91E-40	1.93E-39	up regulation
MYRFL	0.127881919	0.410763607	1.683496066	4.82E-13	1.06E-12	up regulation
SIX4	1.226102809	3.93611902	1.682693891	1.03E-38	9.18E-38	up regulation
MRPS30	7.287852929	23.37620259	1.681474836	1.35E-11	2.76E-11	up regulation
NEFH	0.735028544	2.357407185	1.681328788	0.001306605	0.001653284	up regulation
CCDC189	0.191637148	0.614446096	1.680909206	1.31E-28	6.52E-28	up regulation
COMTD1	2.141109266	6.847231635	1.677162396	1.39E-33	9.14E-33	up regulation
ZNF367	1.02023545	3.251870223	1.672367546	3.36E-43	4.06E-42	up regulation
AL365356.4	0.086076712	0.274130306	1.671166959	0.001213013	0.001538282	up regulation
LINC01214	0.068291029	0.217482897	1.671133971	2.06E-06	3.15E-06	up regulation
MIR6835	0.334764276	1.066018745	1.67101532	5.45E-18	1.57E-17	up regulation
OAS2	6.851037805	21.80772202	1.670444626	1.41E-21	4.86E-21	up regulation
CCR4	0.435069661	1.3845918	1.670142389	3.01E-21	1.02E-20	up regulation
C21orf58	0.626076448	1.992311634	1.670032594	1.02E-45	1.48E-44	up regulation
GAPDHP1	2.338139257	7.439957974	1.669933614	3.57E-10	6.77E-10	up regulation
LLGL2	4.311947011	13.71453514	1.669294368	8.81E-49	1.69E-47	up regulation
CA12	20.80776444	66.09390522	1.667395269	1.81E-15	4.53E-15	up regulation
AP004371.1	0.084754043	0.269117947	1.666884501	0.020445791	0.023478832	up regulation
BOLA2B	0.11424161	0.362660048	1.666529609	4.91E-36	3.69E-35	up regulation
BX640514.2	0.467277949	1.481513786	1.66471919	1.47E-11	3.01E-11	up regulation
FGFR4	1.361360207	4.314163182	1.664031902	7.02E-08	1.17E-07	up regulation
PCP2	1.538258255	4.871203549	1.662980534	2.55E-10	4.89E-10	up regulation
AC106795.2	0.410012087	1.29825902	1.662839903	1.48E-20	4.84E-20	up regulation
HELLS	0.618304435	1.957676563	1.662753172	1.03E-41	1.14E-40	up regulation
CBX4	6.683101479	21.15813303	1.662622645	4.63E-50	9.95E-49	up regulation
CCDC154	0.247717132	0.783709212	1.661624804	3.67E-15	9.06E-15	up regulation
C9orf106	0.09247549	0.292486514	1.661227167	5.96E-12	1.24E-11	up regulation
KMO	0.539536386	1.704071429	1.659193648	6.28E-14	1.45E-13	up regulation
CASP16P	0.157027871	0.49589464	1.659012984	6.42E-09	1.14E-08	up regulation
AC092569.1	0.277742181	0.877081318	1.658964311	1.30E-13	2.94E-13	up regulation
SLC23A1	0.217954091	0.688006826	1.658398597	3.50E-14	8.22E-14	up regulation
AC004522.1	0.108552502	0.342205711	1.656470854	9.95E-06	1.46E-05	up regulation
VSIG1	0.102790971	0.323965668	1.656127383	1.71E-10	3.30E-10	up regulation
AC243829.1	0.135978725	0.428525413	1.655999821	5.96E-08	9.99E-08	up regulation
SLC7A13	0.09302433	0.293107837	1.655751543	9.12E-12	1.88E-11	up regulation
DDIAS	0.556752349	1.754165993	1.655677627	2.00E-37	1.64E-36	up regulation
TEKT5	0.150399558	0.47383554	1.655586089	1.29E-19	4.01E-19	up regulation
PAQR6	0.982574567	3.094399704	1.65502076	1.49E-18	4.40E-18	up regulation
EXOC3L4	0.096235952	0.302875552	1.654077264	2.75E-05	3.90E-05	up regulation
SIAH2	14.16968974	44.5837642	1.653710259	1.20E-38	1.06E-37	up regulation
SMIM6	0.087915249	0.276489763	1.653040731	0.023586039	0.026951318	up regulation
MAFG-DT	1.508525338	4.743192481	1.652719486	5.64E-42	6.35E-41	up regulation
AC016888.1	2.40158677	7.549624673	1.652416989	2.11E-18	6.21E-18	up regulation
C6orf141	1.787872117	5.619131742	1.652103678	0.002572025	0.00318062	up regulation
RASL11B	1.084008588	3.403581573	1.650677501	2.56E-30	1.39E-29	up regulation
ESR1	12.98296167	40.74946373	1.650161545	1.15E-08	2.01E-08	up regulation
PTPRN	0.094363885	0.295928999	1.648944355	1.61E-30	8.86E-30	up regulation
SORD	3.387859769	10.6149851	1.647656281	1.49E-33	9.79E-33	up regulation
AC239803.3	0.109373348	0.342594957	1.647242689	1.28E-16	3.42E-16	up regulation
MIR1972-1	0.194456958	0.608563492	1.645956927	0.031855553	0.035996775	up regulation
AL683807.1	0.161337426	0.504212023	1.643949378	6.46E-21	2.16E-20	up regulation
NAT14	3.305629618	10.33044331	1.643905175	1.29E-41	1.41E-40	up regulation
AC004233.3	0.72653619	2.270155801	1.643684746	1.90E-24	7.55E-24	up regulation
SMYD3	0.734627143	2.29453833	1.643119799	9.58E-50	1.98E-48	up regulation
FNDC10	2.987391745	9.328550109	1.642766433	1.12E-35	8.22E-35	up regulation
RSAD2	2.911334398	9.076386025	1.640437411	2.21E-16	5.80E-16	up regulation
NAT8B	0.117694009	0.366714862	1.639617847	1.49E-17	4.17E-17	up regulation
AL589765.6	0.127894686	0.398202768	1.638546933	1.19E-25	5.06E-25	up regulation
TJP3	4.813754243	14.94489016	1.634417899	3.32E-37	2.69E-36	up regulation
AL445524.1	2.077343867	6.44644435	1.633763588	2.22E-40	2.24E-39	up regulation
F2RL2	3.156118896	9.791964009	1.633446701	2.67E-17	7.38E-17	up regulation
AC106782.2	1.770348272	5.490441311	1.632888913	6.48E-32	3.86E-31	up regulation
RN7SL239P	0.070163762	0.217240474	1.630494911	2.70E-06	4.09E-06	up regulation
CARMIL2	0.235135074	0.727501954	1.629461369	2.30E-11	4.66E-11	up regulation
AC078864.1	0.220876613	0.683087423	1.62882956	9.05E-07	1.41E-06	up regulation
HSPA6	1.270867619	3.929409035	1.628498595	2.23E-24	8.86E-24	up regulation
AP006284.1	0.687897616	2.126461277	1.628188822	1.63E-10	3.14E-10	up regulation
CENPW	4.906973854	15.15587434	1.626971594	1.18E-19	3.70E-19	up regulation
AL136115.1	0.154001008	0.475650143	1.626961021	0.000863391	0.001105608	up regulation
SLC39A6	117.1273896	361.4679187	1.625789128	1.26E-07	2.08E-07	up regulation
KRT19P1	0.158915316	0.490387503	1.625664034	3.48E-20	1.12E-19	up regulation
AC087239.1	0.153402895	0.473063874	1.624709278	1.09E-18	3.24E-18	up regulation
FOXD4	0.102747592	0.316733006	1.624162634	2.60E-26	1.14E-25	up regulation
AC016705.2	0.320098524	0.985939984	1.622983806	1.10E-14	2.64E-14	up regulation
SUSD4	2.625642199	8.085702301	1.622702756	2.18E-14	5.17E-14	up regulation
GLYATL1P2	0.074398655	0.229038188	1.622239723	0.02873823	0.032606882	up regulation
PODXL2	7.875645664	24.24229006	1.622055881	1.76E-27	8.24E-27	up regulation
TMEM121	0.979020516	3.01169131	1.621162907	1.42E-22	5.13E-22	up regulation
GPR143	0.770735803	2.369580992	1.620323657	1.13E-22	4.10E-22	up regulation
PCSK9	0.10745189	0.330002973	1.618788156	1.20E-06	1.87E-06	up regulation
MCRIP2	2.038210151	6.257459327	1.618274199	2.24E-44	2.94E-43	up regulation
ASPHD1	0.779919834	2.393684642	1.61783535	7.62E-07	1.19E-06	up regulation
FCGR1A	0.637906058	1.955840467	1.616372814	1.02E-36	8.04E-36	up regulation
VCAN	10.23865188	31.38539709	1.616067694	9.18E-26	3.92E-25	up regulation
BCL2A1	1.776330065	5.442151386	1.615277411	2.31E-09	4.19E-09	up regulation
AC084125.4	0.179377444	0.549097897	1.614064899	3.06E-22	1.09E-21	up regulation
AC124798.1	0.237622452	0.726926939	1.613139214	2.93E-20	9.44E-20	up regulation
CCR7	1.169627208	3.576487739	1.612494719	6.10E-09	1.08E-08	up regulation
C9orf163	0.104664049	0.319894255	1.611829107	7.99E-33	5.02E-32	up regulation
AC124067.2	0.907527201	2.772971003	1.61141974	3.42E-05	4.83E-05	up regulation
FOXO6	0.941069311	2.875322423	1.611350852	7.14E-36	5.32E-35	up regulation
SLC2A6	0.674501218	2.060262677	1.610935335	6.81E-26	2.92E-25	up regulation
RASSF7	4.454504731	13.60022971	1.610294078	9.76E-35	6.82E-34	up regulation
ASIC3	0.292355888	0.891841504	1.609061691	2.34E-18	6.85E-18	up regulation
RAB31	12.27612427	37.39890824	1.607141	7.02E-29	3.54E-28	up regulation
LRP8	0.483859157	1.472846793	1.605948297	2.39E-21	8.17E-21	up regulation
SH2D2A	0.630011325	1.917695927	1.605924316	1.76E-17	4.91E-17	up regulation
GALNT5	1.170036217	3.560779358	1.605639855	0.00043141	0.000564412	up regulation
PCAT6	2.375671595	7.224072384	1.604476932	4.74E-36	3.57E-35	up regulation
ARHGAP39	1.940880059	5.89946268	1.603872594	8.42E-47	1.34E-45	up regulation
LIMD2	1.549691902	4.702379675	1.60140961	1.86E-26	8.23E-26	up regulation
LINC00160	0.569198002	1.726373696	1.600742285	9.29E-12	1.91E-11	up regulation
CXCR3	0.925220099	2.803886999	1.599559696	2.26E-11	4.57E-11	up regulation
AL023803.1	0.155838528	0.471823878	1.598196476	8.87E-14	2.04E-13	up regulation
LRRC56	1.30456954	3.946891508	1.597143014	3.93E-27	1.80E-26	up regulation
COL1A2	156.1822973	472.5014945	1.597087954	9.82E-24	3.77E-23	up regulation
KRT8P45	0.355799647	1.076162979	1.596759599	1.20E-21	4.16E-21	up regulation
MMP2-AS1	0.148988928	0.449919433	1.59446156	1.33E-16	3.54E-16	up regulation
MAL2	32.75032247	98.85421629	1.593793388	4.09E-42	4.65E-41	up regulation
FEN1	5.905906027	17.8250629	1.593676861	1.25E-53	3.94E-52	up regulation
AC021087.3	0.47015627	1.41877769	1.593436288	7.21E-09	1.27E-08	up regulation
TRIB3	4.884896755	14.7233289	1.591703922	4.41E-44	5.66E-43	up regulation
MFSD3	5.715470283	17.21959381	1.591106995	9.33E-39	8.35E-38	up regulation
KLHDC9	2.287045988	6.8758233	1.588047094	5.89E-27	2.67E-26	up regulation
CCDC87	0.252553218	0.758912463	1.587346063	1.77E-26	7.85E-26	up regulation
PAX9	0.545756309	1.639131345	1.586602655	5.72E-16	1.47E-15	up regulation
EVPL	2.605342608	7.818640382	1.58544465	1.67E-39	1.57E-38	up regulation
PSPHP1	5.096022018	15.29180713	1.585315493	9.36E-07	1.46E-06	up regulation
SRPK3	0.376405074	1.129405491	1.585205569	3.44E-14	8.06E-14	up regulation
HSPB1	117.6245247	352.5493543	1.583636345	2.47E-24	9.78E-24	up regulation
MXD3	0.60863077	1.821928164	1.581826899	2.61E-34	1.79E-33	up regulation
ROCK1P1	0.395022669	1.181629444	1.580770328	1.67E-15	4.18E-15	up regulation
AL645608.8	0.087913933	0.262918755	1.580453324	5.90E-13	1.30E-12	up regulation
DLGAP3	0.096395625	0.288167009	1.579865597	5.51E-05	7.66E-05	up regulation
CREB3L4	15.97293573	47.72596571	1.579144895	3.01E-33	1.94E-32	up regulation
C5orf49	0.552596497	1.650192955	1.578336406	1.18E-13	2.69E-13	up regulation
APOBEC3A	0.213007276	0.635875249	1.577841042	0.000693309	0.000895235	up regulation
AC091182.2	0.156941068	0.468400232	1.57751887	1.85E-14	4.41E-14	up regulation
RNA5SP268	0.106963357	0.319066056	1.576738487	0.000706201	0.000910992	up regulation
PRRT2	0.631318887	1.88312165	1.576685383	3.52E-16	9.14E-16	up regulation
AC091057.1	0.215933237	0.643885182	1.576218126	1.22E-36	9.51E-36	up regulation
AC108860.2	0.533482556	1.590542872	1.576006255	2.70E-31	1.55E-30	up regulation
AC096536.2	0.177712008	0.529577762	1.575301369	5.47E-32	3.27E-31	up regulation
AC006970.2	0.274434565	0.817735273	1.57517167	1.24E-06	1.91E-06	up regulation
AC114956.2	0.167118953	0.497686663	1.574362366	0.00506377	0.006117058	up regulation
KRTAP5-AS1	0.237921889	0.707884188	1.57302534	3.91E-14	9.15E-14	up regulation
GUSBP3	0.110277015	0.328021915	1.572660076	0.015015883	0.017408467	up regulation
UPK2	0.220298581	0.655229961	1.572541127	0.006373345	0.007628984	up regulation
SLC4A8	0.599475634	1.782717649	1.572305203	1.27E-11	2.60E-11	up regulation
SAMD12-AS1	0.192277054	0.571507349	1.571585443	1.39E-25	5.86E-25	up regulation
FAM234B	5.700536363	16.9118658	1.56886626	3.93E-08	6.65E-08	up regulation
AC012073.1	0.374083931	1.108759322	1.567512333	2.57E-37	2.09E-36	up regulation
AC022211.3	0.205624116	0.60925271	1.567031283	4.37E-26	1.89E-25	up regulation
FADS2	6.087616392	18.03684694	1.566997804	2.16E-09	3.92E-09	up regulation
TSPAN13	50.74018727	150.2980424	1.566625469	8.46E-33	5.31E-32	up regulation
MIR4728	0.386927783	1.146094011	1.56658916	0.001136337	0.001444547	up regulation
LRFN1	0.697465766	2.065282892	1.566145098	1.25E-31	7.33E-31	up regulation
AC104667.2	0.536532034	1.587863066	1.565350287	4.28E-30	2.29E-29	up regulation
SELL	2.839732143	8.403109056	1.565168353	1.60E-10	3.09E-10	up regulation
HIST1H2BN	0.228406746	0.675720867	1.564822146	1.24E-24	5.00E-24	up regulation
CD19	0.308341497	0.911920171	1.564378473	0.000570262	0.000740477	up regulation
ATP2A3	5.414570659	15.99378632	1.562592668	5.97E-19	1.80E-18	up regulation
AP003419.3	0.404325407	1.19345128	1.561550906	1.65E-14	3.95E-14	up regulation
SIRPG	0.424765971	1.253667768	1.561414974	1.10E-08	1.92E-08	up regulation
HIST1H4PS1	0.121464713	0.3582934	1.560604221	8.13E-08	1.35E-07	up regulation
AC117498.2	0.185146435	0.545608648	1.559199737	2.25E-24	8.93E-24	up regulation
KAZALD1	1.625088393	4.785637393	1.558192896	3.78E-12	7.96E-12	up regulation
SLAMF8	2.007741156	5.910582664	1.557727073	1.58E-24	6.30E-24	up regulation
AC005041.3	0.332372133	0.978101924	1.557185382	1.23E-29	6.44E-29	up regulation
CKMT1A	0.51064954	1.50082265	1.555348094	8.50E-11	1.67E-10	up regulation
AC073263.1	0.102722791	0.301789486	1.554786246	9.07E-08	1.50E-07	up regulation
FUT8-AS1	0.226073102	0.663398619	1.553086657	2.60E-13	5.83E-13	up regulation
CRIP1	1.265141049	3.712291226	1.553011655	1.08E-20	3.55E-20	up regulation
KRT18	90.22312861	264.5971203	1.552228141	2.87E-32	1.74E-31	up regulation
SERPINA11	3.682162009	10.79766243	1.55209401	0.020025322	0.023013101	up regulation
PPP1R14BP3	9.382044867	27.49319431	1.551100232	8.47E-44	1.07E-42	up regulation
MORN3	0.376134657	1.101940843	1.550725629	1.98E-26	8.72E-26	up regulation
AL603839.4	0.083554179	0.244624641	1.549785845	3.60E-23	1.34E-22	up regulation
TMEM158	2.081486228	6.093847933	1.549739486	3.21E-06	4.84E-06	up regulation
BNIP3P17	0.263705665	0.771723574	1.549155615	5.11E-18	1.47E-17	up regulation
MIR210HG	0.551070633	1.612046703	1.54858439	2.25E-21	7.69E-21	up regulation
FUT2	1.049239777	3.067427146	1.547684672	2.76E-19	8.48E-19	up regulation
AL133153.1	0.079738075	0.2329603	1.54674344	5.69E-14	1.32E-13	up regulation
DNAH14	0.262649932	0.76707828	1.546232599	2.43E-44	3.18E-43	up regulation
GALE	3.53356231	10.31796359	1.545963006	3.14E-44	4.07E-43	up regulation
COL12A1	17.50140388	51.04261666	1.544231637	4.26E-20	1.36E-19	up regulation
AC136632.2	0.142398705	0.414977968	1.543098717	3.09E-35	2.22E-34	up regulation
IL11	0.148813545	0.433184881	1.541477049	3.65E-24	1.43E-23	up regulation
PARPBP	0.577863919	1.679811959	1.539498045	6.20E-44	7.89E-43	up regulation
GGH	3.841333064	11.15988475	1.538643165	2.65E-16	6.94E-16	up regulation
AC005730.3	0.094631213	0.274796476	1.537975474	7.10E-08	1.19E-07	up regulation
TMEM63C	1.745178985	5.062296593	1.536417029	1.75E-21	6.03E-21	up regulation
NAT2	0.307411447	0.89129576	1.535733354	0.001392491	0.001758117	up regulation
TLE6	0.497945875	1.443083636	1.535094076	2.96E-19	9.10E-19	up regulation
EGLN3	2.352683913	6.817809502	1.535000784	1.65E-16	4.36E-16	up regulation
RF00406	0.31528312	0.913469754	1.53470903	1.00E-08	1.75E-08	up regulation
MIF	13.07333908	37.85592565	1.533891476	3.10E-32	1.88E-31	up regulation
PPP1R14B	15.78565296	45.70750726	1.533817203	7.83E-46	1.15E-44	up regulation
KIF24	0.61802138	1.788097559	1.532696799	3.27E-46	4.94E-45	up regulation
RELT	0.493686925	1.428156169	1.532485405	1.71E-46	2.65E-45	up regulation
AC011465.1	0.137105867	0.396247105	1.531110093	1.01E-07	1.67E-07	up regulation
MANEAL	2.571542335	7.428272762	1.530392886	5.01E-30	2.67E-29	up regulation
AL590133.1	0.128434275	0.370993895	1.530365183	2.25E-19	6.94E-19	up regulation
AZU1	0.251588884	0.726281465	1.529460582	0.044077028	0.049263342	up regulation
OAS3	6.585317301	18.99162616	1.528038581	3.47E-26	1.51E-25	up regulation
TAP1	11.55948599	33.33127051	1.527799063	1.55E-25	6.51E-25	up regulation
AL357054.2	0.235700607	0.678792866	1.52601593	2.59E-05	3.68E-05	up regulation
FAM155B	0.383527308	1.104189302	1.525586321	3.37E-12	7.11E-12	up regulation
RNU6-403P	0.435840727	1.254355893	1.525073817	1.91E-12	4.08E-12	up regulation
AC015987.1	0.208251532	0.599201319	1.524713693	1.18E-08	2.06E-08	up regulation
P2RY6	0.525995361	1.510697897	1.522093206	5.30E-25	2.17E-24	up regulation
RNA5SP160	0.158718176	0.455313648	1.52039335	0.02151216	0.02465908	up regulation
CASKIN1	0.168399177	0.4829959	1.520125854	1.81E-17	5.06E-17	up regulation
POLR3K	5.23427323	15.00880349	1.519747829	2.72E-57	1.41E-55	up regulation
RELL2	0.301709116	0.865014972	1.519566816	2.25E-30	1.22E-29	up regulation
P3H4	4.163399494	11.93127204	1.51891396	2.64E-47	4.36E-46	up regulation
AC020928.1	0.102140705	0.292697322	1.518851626	0.002218965	0.002757417	up regulation
H2AFZP3	0.125987344	0.360658785	1.517355754	2.05E-18	6.02E-18	up regulation
FCRL3	0.15782687	0.451483442	1.516330234	3.20E-05	4.53E-05	up regulation
HIST1H2AC	23.39690982	66.91205459	1.515948147	3.66E-26	1.59E-25	up regulation
ESRP1	12.50115206	35.73708477	1.515360897	4.65E-50	9.98E-49	up regulation
AC005828.6	0.119361146	0.341167921	1.51514871	3.18E-05	4.51E-05	up regulation
BOP1	6.475929628	18.50841353	1.515022025	1.58E-36	1.23E-35	up regulation
NME1-NME2	0.318577482	0.909423758	1.513308398	3.19E-22	1.13E-21	up regulation
ERP27	3.259448191	9.292933456	1.511506333	6.68E-12	1.38E-11	up regulation
SPAG4	0.90988326	2.593296047	1.51103355	2.29E-27	1.06E-26	up regulation
CXCL13	13.99751866	39.89103211	1.510893348	1.82E-13	4.11E-13	up regulation
SLC6A9	2.122037804	6.045000983	1.510292216	2.85E-25	1.18E-24	up regulation
LINC01857	0.38991523	1.110117623	1.509480133	1.07E-23	4.10E-23	up regulation
DNAJC1	13.73913928	39.06949738	1.507751069	9.48E-38	7.92E-37	up regulation
ZNF467	3.131602258	8.905209702	1.507748596	7.62E-33	4.80E-32	up regulation
BIK	5.222986982	14.8522766	1.507737075	1.70E-25	7.16E-25	up regulation
AC091057.4	0.118633912	0.337317648	1.50759133	2.66E-22	9.49E-22	up regulation
SLC25A22	2.812269665	7.992419806	1.506897424	1.60E-51	4.05E-50	up regulation
AC093700.1	0.086666294	0.246283426	1.50677662	8.65E-14	1.99E-13	up regulation
ZNF296	1.347220735	3.828041144	1.506620087	1.06E-29	5.54E-29	up regulation
TIMELESS	3.354685032	9.526907684	1.50583069	1.04E-53	3.30E-52	up regulation
AC092718.4	2.124273682	6.032679094	1.505829192	2.59E-33	1.68E-32	up regulation
AC022146.2	0.188055357	0.53370872	1.50489518	2.77E-08	4.73E-08	up regulation
RNU6-1209P	0.18128651	0.514220504	1.504115565	1.92E-07	3.12E-07	up regulation
HID1	9.883228365	28.02034525	1.50342045	2.84E-30	1.54E-29	up regulation
INAVA	0.778239414	2.206173066	1.503260017	0.033360276	0.037619121	up regulation
WDR34	13.18934499	37.37187224	1.502579922	3.56E-50	7.76E-49	up regulation
CDH11	3.890660627	11.0228016	1.502403904	1.71E-27	8.03E-27	up regulation
RASGRP1	1.1900038	3.369547961	1.50158888	2.43E-11	4.92E-11	up regulation
AL139132.1	0.086597769	0.245023061	1.500515781	3.52E-06	5.30E-06	up regulation
LSR	19.46884601	55.05466292	1.499697387	2.19E-47	3.66E-46	up regulation
LRRN2	2.161257274	6.111259896	1.499599017	6.33E-17	1.72E-16	up regulation
AC010336.2	0.078535686	0.221926282	1.498660277	2.52E-14	5.97E-14	up regulation
DPP3	6.305610195	17.81537063	1.498414605	2.21E-56	9.95E-55	up regulation
AL138752.1	0.10647408	0.300811679	1.498358318	2.64E-06	4.00E-06	up regulation
CHEK1	1.02284317	2.888994459	1.49798248	1.40E-41	1.53E-40	up regulation
AL133230.1	0.095184556	0.268330758	1.495213026	9.95E-06	1.46E-05	up regulation
GOLT1A	2.28856409	6.449288086	1.494697221	1.36E-25	5.73E-25	up regulation
DOC2A	0.280646221	0.790854881	1.494660356	1.37E-08	2.38E-08	up regulation
PRSS27	0.293634104	0.827209005	1.494232354	1.23E-15	3.10E-15	up regulation
HMGA1	22.63023428	63.7077048	1.493216342	1.86E-37	1.53E-36	up regulation
ABCC12	0.11547216	0.324691405	1.491524129	0.020933505	0.024022523	up regulation
ARSI	0.573188059	1.611718007	1.491518885	2.39E-22	8.56E-22	up regulation
AC145207.9	0.385978312	1.084790602	1.490824893	1.31E-22	4.75E-22	up regulation
CKMT1B	0.550051989	1.545730863	1.490649257	1.42E-07	2.33E-07	up regulation
C3orf52	1.069237058	3.004379694	1.490485407	1.86E-17	5.20E-17	up regulation
REPS2	2.554615366	7.174858378	1.489844266	1.48E-06	2.28E-06	up regulation
AC105137.2	0.09274478	0.260430246	1.489559022	1.19E-23	4.54E-23	up regulation
DSCC1	1.627868987	4.566124008	1.487985447	1.05E-29	5.52E-29	up regulation
RBBP8NL	1.208596052	3.389036741	1.487543143	1.68E-34	1.16E-33	up regulation
CRB3	3.651199359	10.23631004	1.487253401	3.90E-47	6.35E-46	up regulation
MAG	0.16801412	0.470740165	1.486348471	5.05E-07	7.99E-07	up regulation
POLE2	0.84990779	2.380776783	1.486054131	2.87E-48	5.22E-47	up regulation
MIAT	0.268069909	0.750770995	1.485763627	5.40E-19	1.64E-18	up regulation
AL139220.2	0.098193361	0.274938678	1.485412484	1.05E-13	2.40E-13	up regulation
RAD54B	0.315482892	0.883089678	1.48499818	3.21E-38	2.77E-37	up regulation
RND1	2.453266754	6.857660134	1.483012293	7.20E-21	2.40E-20	up regulation
FNDC1	4.364857978	12.19214889	1.481945808	3.44E-22	1.22E-21	up regulation
AC010761.6	0.086714892	0.242181629	1.481737754	1.61E-12	3.45E-12	up regulation
AL161669.3	0.199512278	0.556772962	1.480611622	2.91E-08	4.96E-08	up regulation
ENO2	4.389690177	12.24910462	1.480485272	1.53E-15	3.83E-15	up regulation
RNF223	0.728159615	2.031693365	1.480356045	5.66E-19	1.71E-18	up regulation
SMC4	2.966609213	8.276924506	1.480279903	8.45E-38	7.08E-37	up regulation
AC092171.4	0.26658583	0.743778443	1.48027284	4.19E-28	2.02E-27	up regulation
RTN4RL2	0.720843485	2.010186297	1.479571262	1.62E-34	1.13E-33	up regulation
MICAL2	2.533896641	7.061144038	1.478544269	1.61E-39	1.52E-38	up regulation
EVA1B	8.018458773	22.33356186	1.477816489	2.17E-15	5.40E-15	up regulation
AC110285.7	0.143855801	0.400660915	1.47775838	1.04E-06	1.61E-06	up regulation
AL445483.1	0.191391473	0.532935147	1.477433426	3.01E-05	4.27E-05	up regulation
SECTM1	4.600492612	12.8053019	1.476881011	7.70E-17	2.08E-16	up regulation
COL24A1	0.127137504	0.353747968	1.476332197	2.88E-31	1.65E-30	up regulation
BRCA2	0.379134596	1.054570541	1.475873587	3.62E-34	2.46E-33	up regulation
KRT8P11	0.319487713	0.888484575	1.475586283	1.20E-12	2.60E-12	up regulation
AL451050.2	0.125388564	0.348469186	1.47462531	2.56E-20	8.30E-20	up regulation
OAS1	5.755092981	15.98946767	1.474210766	1.92E-19	5.96E-19	up regulation
AL589765.4	0.722514758	2.007150398	1.474049763	2.51E-26	1.10E-25	up regulation
NME3	14.52141636	40.33658076	1.47390662	9.89E-32	5.82E-31	up regulation
AC007687.1	0.08256351	0.229278964	1.473527779	6.27E-05	8.69E-05	up regulation
GALNT6	11.30385278	31.37910753	1.472989739	3.94E-17	1.08E-16	up regulation
C5AR2	1.202201276	3.335324265	1.472148572	2.80E-13	6.26E-13	up regulation
AC010326.4	2.781747104	7.7159685	1.471855987	2.17E-28	1.06E-27	up regulation
CELSR1	7.188713996	19.9229739	1.470627403	1.11E-20	3.66E-20	up regulation
AL157838.1	0.31150615	0.863267568	1.470547142	5.35E-19	1.62E-18	up regulation
ROGDI	4.685024266	12.97850666	1.469995967	2.36E-42	2.73E-41	up regulation
TRIM46	0.520004494	1.440060683	1.469533611	5.36E-20	1.71E-19	up regulation
MLPH	17.31928252	47.95611713	1.469335687	1.60E-19	4.97E-19	up regulation
GAPDHP35	0.591162468	1.636626123	1.469098202	1.10E-09	2.03E-09	up regulation
AC027228.2	0.137216806	0.379762977	1.468642071	5.51E-06	8.20E-06	up regulation
ARPC3P1	0.148441067	0.410805816	1.468566327	7.36E-13	1.61E-12	up regulation
DDX39A	6.491504469	17.96405445	1.46848822	1.54E-53	4.80E-52	up regulation
EVL	10.07504727	27.84709679	1.46674032	1.97E-17	5.48E-17	up regulation
AP1M2	18.98005003	52.45335724	1.466551319	1.84E-46	2.85E-45	up regulation
AL159163.1	0.190883151	0.527122942	1.465449722	1.72E-27	8.07E-27	up regulation
GZMK	1.492779505	4.117611548	1.463806649	7.72E-06	1.14E-05	up regulation
AP000695.2	0.149132643	0.411349662	1.463769182	2.26E-28	1.10E-27	up regulation
TMEM97	5.222220186	14.37659634	1.460986966	3.39E-33	2.18E-32	up regulation
IFIT1	8.284109053	22.80572556	1.460977619	0.000176967	0.000237838	up regulation
FER1L4	0.291846728	0.803424683	1.460951891	5.48E-09	9.73E-09	up regulation
H2AFZ	31.65239726	87.12943013	1.460845338	3.24E-58	2.01E-56	up regulation
HIST4H4	0.572427665	1.574602452	1.459822326	2.92E-08	4.98E-08	up regulation
CCDC74B	0.687207206	1.890151452	1.459684768	1.63E-05	2.36E-05	up regulation
TBILA	0.504439756	1.387032832	1.459248052	1.09E-11	2.24E-11	up regulation
AC010168.2	0.673932607	1.852750737	1.458992565	6.70E-11	1.32E-10	up regulation
CFAP58-DT	0.286338134	0.786569677	1.457854751	0.000435063	0.000569071	up regulation
RAD17P1	0.195639864	0.536810953	1.456213745	0.000145736	0.000197011	up regulation
TUFT1	6.369229036	17.47514057	1.456113404	3.23E-46	4.89E-45	up regulation
AC004988.1	0.081922145	0.224763842	1.456084563	1.76E-24	7.03E-24	up regulation
LRRC45	3.072243425	8.426357588	1.45561661	9.10E-39	8.15E-38	up regulation
HGH1	6.507875283	17.83875483	1.454756408	4.11E-53	1.23E-51	up regulation
PCSK4	0.556925304	1.526227627	1.454414398	5.57E-15	1.36E-14	up regulation
LINC02568	2.219908001	6.079480517	1.453448164	3.33E-05	4.70E-05	up regulation
STX1A	0.863666204	2.365013822	1.453302873	5.06E-40	4.96E-39	up regulation
RNU6-548P	0.210707687	0.576589298	1.452301112	1.07E-09	1.99E-09	up regulation
MTCL1	0.52953292	1.447927685	1.45119727	5.52E-15	1.35E-14	up regulation
TONSL-AS1	0.298664637	0.816597435	1.45109861	1.25E-30	6.88E-30	up regulation
AC006483.1	0.07960251	0.21758556	1.450696993	4.26E-11	8.50E-11	up regulation
MESP2	0.503954007	1.37607781	1.449198071	0.000201766	0.000270149	up regulation
LAIR2	0.125670533	0.343063295	1.44882837	1.69E-05	2.44E-05	up regulation
MISP3	2.360648898	6.439648017	1.447798351	1.83E-23	6.91E-23	up regulation
LINC01711	0.342664831	0.934090131	1.446763634	5.24E-21	1.76E-20	up regulation
RUSC1	4.957088301	13.51240048	1.44671913	3.05E-61	4.49E-59	up regulation
UCN	0.573495524	1.562422295	1.445930311	5.47E-19	1.66E-18	up regulation
LINC01556	0.10935748	0.297931634	1.445929412	3.17E-07	5.09E-07	up regulation
BNIP3P27	0.170778984	0.464684312	1.444120491	5.83E-05	8.10E-05	up regulation
SLC2A1	9.522343965	25.89177096	1.443104999	1.26E-31	7.38E-31	up regulation
C8G	0.256813756	0.697943916	1.44238863	9.02E-14	2.07E-13	up regulation
SNX25P1	0.276503191	0.750583629	1.440716693	2.66E-29	1.37E-28	up regulation
AC108134.4	0.759197688	2.060590889	1.440510597	4.07E-18	1.18E-17	up regulation
ARMT1	17.26201699	46.82804664	1.439771812	2.39E-08	4.10E-08	up regulation
DNMT3B	0.807482156	2.189849165	1.439329218	7.31E-27	3.29E-26	up regulation
SAC3D1	3.033346599	8.220118215	1.438248788	4.31E-42	4.89E-41	up regulation
AC092142.1	0.207853134	0.563076049	1.437765287	7.92E-09	1.39E-08	up regulation
AC010616.1	0.154873218	0.419543562	1.437732929	2.05E-10	3.94E-10	up regulation
LOXL1	6.246686522	16.91907964	1.437488053	2.80E-32	1.71E-31	up regulation
EXOSC4	7.183392407	19.44359325	1.436557626	7.06E-39	6.38E-38	up regulation
FAM183A	0.640133754	1.732640617	1.436527155	3.52E-09	6.33E-09	up regulation
CD24	140.3138146	379.4112704	1.435105478	1.06E-13	2.42E-13	up regulation
CHRD	1.678164404	4.536698764	1.434758809	0.001150964	0.001462138	up regulation
MRPL12	7.059803641	19.07819338	1.434224598	2.89E-30	1.56E-29	up regulation
DRD4	0.221603213	0.598802279	1.434100914	2.11E-17	5.87E-17	up regulation
SLC12A8	1.642137877	4.433370027	1.432828517	2.98E-43	3.62E-42	up regulation
TOX3	2.191878918	5.91661135	1.432603027	4.24E-10	7.99E-10	up regulation
RIMKLA	0.273046921	0.737007526	1.432530465	2.19E-06	3.33E-06	up regulation
AC008895.1	0.143744602	0.387930345	1.432289851	3.74E-08	6.34E-08	up regulation
MTHFD2	8.50848231	22.94627232	1.431286082	7.84E-51	1.85E-49	up regulation
CLDN14	0.090784185	0.244732132	1.430690634	1.04E-25	4.45E-25	up regulation
VPREB3	0.655430446	1.766794185	1.430619394	2.05E-05	2.94E-05	up regulation
HPN-AS1	0.093844976	0.252940504	1.430446665	2.61E-14	6.17E-14	up regulation
SDF2L1	7.103563835	19.14381145	1.430263186	2.65E-37	2.15E-36	up regulation
NECAB3	4.152329027	11.18833297	1.430002423	1.26E-33	8.33E-33	up regulation
MCEMP1	0.081467811	0.219405004	1.429294381	3.46E-10	6.56E-10	up regulation
NOD2	0.709379628	1.908446503	1.427768942	9.54E-24	3.67E-23	up regulation
CBX8	1.185373453	3.186658504	1.426702769	4.01E-43	4.83E-42	up regulation
AC006329.1	1.218498333	3.275512415	1.42661634	1.69E-16	4.46E-16	up regulation
KCNK6	3.915379995	10.52289517	1.426307453	1.23E-27	5.80E-27	up regulation
LINC02446	0.345058746	0.927346627	1.426266696	0.014674582	0.0170245	up regulation
HLA-DPA3	0.191167101	0.513365986	1.425153446	1.22E-07	2.00E-07	up regulation
LRRC26	1.3623771	3.658184697	1.425001827	1.11E-05	1.62E-05	up regulation
OSM	0.519259566	1.393931253	1.424631616	3.35E-17	9.21E-17	up regulation
CYP27B1	0.490165671	1.31215403	1.420595732	2.01E-11	4.09E-11	up regulation
PHLDA2	3.777908895	10.11319348	1.420578818	1.95E-18	5.74E-18	up regulation
AC004816.1	1.210424332	3.239153514	1.420103949	2.93E-33	1.89E-32	up regulation
DDX11-AS1	0.159330351	0.426355575	1.42003601	9.86E-32	5.81E-31	up regulation
SEZ6L2	7.673439769	20.52708398	1.419583353	1.15E-14	2.77E-14	up regulation
AC103740.2	0.122548393	0.327553894	1.418380728	0.000490704	0.000640132	up regulation
CENPX	10.96734975	29.28729935	1.417060223	6.92E-41	7.19E-40	up regulation
EME2	1.071670917	2.860437325	1.416373775	4.89E-24	1.91E-23	up regulation
COL3A1	263.6955647	703.8296791	1.416353045	2.74E-21	9.34E-21	up regulation
TMEM79	3.624482981	9.670275844	1.415781828	2.03E-39	1.90E-38	up regulation
KIF22	6.887577717	18.37504726	1.415679363	2.47E-53	7.58E-52	up regulation
GPR18	0.267450906	0.713415961	1.4154694	8.81E-08	1.46E-07	up regulation
RPS15AP36	0.277494327	0.739819936	1.414715899	1.90E-14	4.53E-14	up regulation
MYB-AS1	0.125428852	0.334378263	1.414611818	1.13E-05	1.64E-05	up regulation
CHMP4BP1	0.185479988	0.494463406	1.414600216	3.56E-12	7.49E-12	up regulation
C5orf38	4.173525686	11.12106054	1.41395582	0.040180349	0.045038543	up regulation
FLVCR1	1.723700658	4.592693461	1.41383124	6.22E-48	1.10E-46	up regulation
AC083880.1	0.344809655	0.918689097	1.413776533	1.23E-22	4.44E-22	up regulation
AP003390.1	0.433152668	1.153646528	1.413253748	2.01E-27	9.36E-27	up regulation
PSMD3	18.88168921	50.24516403	1.411996909	5.04E-39	4.60E-38	up regulation
HRASLS2	2.340968765	6.228784846	1.411845055	1.53E-09	2.80E-09	up regulation
LINC01063	0.227112745	0.603969068	1.411065993	3.36E-19	1.03E-18	up regulation
FAM110A	5.157969943	13.71267485	1.410634746	2.31E-42	2.67E-41	up regulation
PLA2G4F	0.415175417	1.103474941	1.410260938	6.64E-14	1.53E-13	up regulation
SPDEF	38.78156852	103.044399	1.40982303	8.80E-23	3.21E-22	up regulation
DLX3	0.755418164	2.006701421	1.409478595	4.83E-08	8.13E-08	up regulation
PRSS8	28.53858154	75.78886374	1.409072247	6.65E-32	3.96E-31	up regulation
RAB19	0.571697274	1.517704541	1.408567647	8.35E-22	2.91E-21	up regulation
SLC11A1	0.34634357	0.919254735	1.408260815	3.64E-28	1.77E-27	up regulation
HMGA1P8	0.236615875	0.627947228	1.408096455	6.82E-20	2.16E-19	up regulation
AC036214.3	0.08648227	0.229485084	1.407924082	2.23E-25	9.34E-25	up regulation
LIVAR	0.134915074	0.357995867	1.407891381	1.90E-07	3.08E-07	up regulation
PCDH17	0.574210558	1.523424802	1.407666528	1.59E-38	1.39E-37	up regulation
AL353708.3	0.151384573	0.401434201	1.406945339	4.07E-26	1.76E-25	up regulation
ZYG11A	0.536540941	1.422642644	1.406813149	1.10E-17	3.11E-17	up regulation
ANO7	0.2075632	0.550016423	1.405924014	7.98E-11	1.57E-10	up regulation
RAB3A	1.513926769	4.009959644	1.405292296	1.24E-37	1.03E-36	up regulation
FKBP4	31.18984864	82.59651316	1.405004328	2.46E-41	2.63E-40	up regulation
ETNK2	4.747574278	12.56902935	1.404610764	4.44E-18	1.28E-17	up regulation
CACNA1I	0.09292876	0.24602159	1.404587869	0.012345422	0.014417125	up regulation
QPRT	2.908478066	7.692223075	1.403136177	1.87E-12	3.99E-12	up regulation
CHAC1	0.596787155	1.578134991	1.402932227	1.33E-11	2.71E-11	up regulation
EHMT2-AS1	0.104032741	0.274751573	1.401090094	1.24E-11	2.55E-11	up regulation
CFAP157	0.392610462	1.036701293	1.400829746	6.26E-34	4.20E-33	up regulation
IER3-AS1	0.245776169	0.648441913	1.399632311	4.70E-26	2.03E-25	up regulation
TXNP5	0.091666285	0.241735651	1.398967139	1.16E-07	1.92E-07	up regulation
H3F3BP1	0.159305395	0.420107162	1.39896225	1.02E-24	4.10E-24	up regulation
EIF4EBP1	20.67729428	54.52795077	1.398948523	3.08E-19	9.45E-19	up regulation
GSEC	0.398030667	1.048630111	1.397554383	2.48E-42	2.86E-41	up regulation
SLC1A2	0.700645884	1.845812367	1.39749853	0.015816074	0.018304095	up regulation
DNAJC22	1.489049634	3.921593113	1.397048013	6.54E-13	1.43E-12	up regulation
FANCD2	1.194585843	3.145722358	1.396880813	3.49E-41	3.70E-40	up regulation
TMEM184A	1.245583793	3.279642213	1.396716358	2.89E-26	1.26E-25	up regulation
TUBA1C	8.501936664	22.38160986	1.396450393	2.66E-52	7.22E-51	up regulation
WFIKKN1	0.098403744	0.258996927	1.396149862	4.88E-14	1.14E-13	up regulation
RNU6-583P	0.102082332	0.268015731	1.392584489	2.64E-08	4.51E-08	up regulation
TRDV1	0.226588436	0.594853388	1.392459899	0.011962123	0.01399243	up regulation
PLEK2	2.223255234	5.832018647	1.39132175	5.84E-33	3.70E-32	up regulation
SYT17	1.251490869	3.277871301	1.389111446	3.88E-10	7.34E-10	up regulation
NACC1	9.210722664	24.12430065	1.389100862	4.86E-58	2.94E-56	up regulation
CCDC150	0.09444617	0.247177745	1.387984651	1.67E-23	6.32E-23	up regulation
SNORA80D	0.183114327	0.478868293	1.386884243	0.016001103	0.018508984	up regulation
SEMA7A	1.008414898	2.636392181	1.386475659	2.91E-30	1.57E-29	up regulation
MRPS34	27.06553442	70.72534194	1.385770372	5.57E-48	9.85E-47	up regulation
SLC39A11	7.200324057	18.79972143	1.384577542	1.78E-37	1.46E-36	up regulation
LINC01588	0.22697972	0.592410425	1.384033626	2.05E-18	6.04E-18	up regulation
POLH-AS1	0.300455919	0.783402528	1.38260044	2.21E-37	1.81E-36	up regulation
TRAV26-1	0.157976819	0.411902	1.382588253	4.35E-06	6.52E-06	up regulation
LIME1	0.369426306	0.962099383	1.38089933	1.70E-20	5.55E-20	up regulation
MBOAT7	9.861981841	25.67522548	1.380427445	1.95E-51	4.87E-50	up regulation
CACNB3	2.578178784	6.712032511	1.380397393	3.45E-43	4.16E-42	up regulation
GADD45G	4.18984449	10.90756408	1.380360346	9.64E-17	2.59E-16	up regulation
TMEM206	1.980530766	5.155492046	1.380223014	5.93E-56	2.51E-54	up regulation
RAB25	28.58308299	74.39701471	1.380083197	5.18E-43	6.18E-42	up regulation
DHDH	0.370748618	0.964787358	1.379769688	7.05E-12	1.46E-11	up regulation
ACOT7	3.054745922	7.947301189	1.379412632	2.65E-40	2.66E-39	up regulation
ANO9	1.199725041	3.119552478	1.37863528	1.20E-23	4.57E-23	up regulation
LSM4	13.29955587	34.58096754	1.378600166	1.43E-55	5.77E-54	up regulation
DRAXIN	0.121624	0.316160784	1.378230488	3.14E-07	5.04E-07	up regulation
MBOAT2	4.264164549	11.07989155	1.377608744	1.71E-29	8.90E-29	up regulation
CDK5	2.77221708	7.196704357	1.37629616	3.26E-54	1.09E-52	up regulation
LAMTOR2	17.29197859	44.86187072	1.375386826	2.94E-51	7.22E-50	up regulation
AC109322.1	0.649630969	1.685087764	1.375131418	8.18E-23	2.99E-22	up regulation
CKAP2	3.442338398	8.925849301	1.374600521	9.48E-45	1.28E-43	up regulation
APOBR	1.932316912	5.008217186	1.373965403	6.04E-20	1.92E-19	up regulation
SNRNP25	5.232239867	13.56018681	1.373876467	7.16E-52	1.87E-50	up regulation
LYZ	37.66790708	97.60347895	1.373596696	1.93E-08	3.32E-08	up regulation
DONSON	2.090744761	5.416788771	1.373420886	1.98E-51	4.92E-50	up regulation
REEP4	5.148087525	13.33344483	1.372941077	8.91E-48	1.54E-46	up regulation
MST1R	1.647632484	4.267305012	1.372930758	1.64E-27	7.68E-27	up regulation
SIAH2-AS1	0.50354378	1.30394722	1.372696354	2.61E-09	4.72E-09	up regulation
ZNF552	9.239392229	23.91909921	1.3722932	1.53E-17	4.27E-17	up regulation
CACFD1	5.926829818	15.33831168	1.371807154	8.83E-41	9.12E-40	up regulation
HIST1H3E	1.608546361	4.160843391	1.37111847	5.62E-17	1.53E-16	up regulation
MIR3178	0.134196909	0.346806142	1.369778009	3.33E-06	5.02E-06	up regulation
P2RX5	0.15746641	0.406922908	1.369711385	5.45E-10	1.02E-09	up regulation
PCNA	33.68110177	87.03609705	1.369674531	8.40E-53	2.41E-51	up regulation
BHLHA15	0.49694217	1.284133486	1.369645302	6.63E-07	1.04E-06	up regulation
MARCKSL1	90.78101488	234.4508286	1.368822856	1.30E-43	1.62E-42	up regulation
LINC01740	0.1388468	0.358512964	1.368531358	0.010315975	0.01214122	up regulation
COX6B1P5	0.095023882	0.245228327	1.367763596	2.94E-13	6.56E-13	up regulation
AL136115.2	0.178884177	0.461624785	1.367694907	2.29E-06	3.47E-06	up regulation
LINC01116	2.897865833	7.475782043	1.367233706	1.27E-11	2.60E-11	up regulation
AL021154.1	0.118083571	0.304582816	1.367026292	3.38E-11	6.78E-11	up regulation
CHPF	17.02769806	43.89648159	1.366221895	2.08E-43	2.55E-42	up regulation
AL157935.1	0.280704498	0.723634456	1.36620892	2.08E-18	6.12E-18	up regulation
AC092809.4	0.199876289	0.515252572	1.366172465	9.73E-08	1.61E-07	up regulation
PVT1	1.511980188	3.895940921	1.365532564	1.36E-25	5.76E-25	up regulation
BST2	82.57759115	212.6627679	1.364745235	2.02E-15	5.04E-15	up regulation
FTLP14	1.077477241	2.773762386	1.364186808	7.41E-11	1.46E-10	up regulation
RETN	0.132008466	0.339794822	1.364033409	1.53E-05	2.21E-05	up regulation
CENPL	0.959423059	2.469524743	1.363994404	3.78E-52	1.01E-50	up regulation
LRFN4	2.986981147	7.6855955	1.363468916	2.65E-22	9.48E-22	up regulation
SYCP2	2.681331405	6.897459835	1.363115607	1.68E-12	3.60E-12	up regulation
GREB1L	0.755708802	1.943167503	1.362507937	9.92E-06	1.45E-05	up regulation
SGO2	0.954550897	2.453048706	1.361681849	3.00E-41	3.19E-40	up regulation
HOXB2	6.937766478	17.82158637	1.361082576	0.000534185	0.000694996	up regulation
STXBP2	3.837606667	9.857782393	1.361056283	8.44E-41	8.73E-40	up regulation
C4A	4.00719841	10.29221111	1.360887105	3.58E-07	5.71E-07	up regulation
CLEC11A	4.695967241	12.05986207	1.360719157	8.78E-21	2.91E-20	up regulation
PRSS22	2.45941958	6.314541025	1.360359993	2.69E-25	1.12E-24	up regulation
UBE2R2-AS1	0.085203616	0.218691572	1.359911051	0.000818109	0.001049364	up regulation
LINC02100	0.129691508	0.332761297	1.359403621	2.46E-05	3.51E-05	up regulation
AL451069.2	0.151023141	0.387127706	1.35803994	1.52E-06	2.33E-06	up regulation
NFE2	0.230674631	0.59126546	1.357946652	0.002783638	0.003434055	up regulation
LMNB2	5.698968416	14.60718038	1.357905019	4.73E-46	7.05E-45	up regulation
CMPK2	1.875064988	4.793140362	1.35403059	2.31E-13	5.20E-13	up regulation
AC141930.1	0.733985289	1.87623956	1.354020991	1.18E-11	2.43E-11	up regulation
RPL39L	6.125310731	15.6400512	1.352390298	2.09E-29	1.08E-28	up regulation
AL390729.1	0.099865498	0.254882591	1.351774601	0.000240295	0.000319886	up regulation
GGCT	21.19448793	54.04319062	1.350423741	1.47E-46	2.30E-45	up regulation
CORO2A	4.088094763	10.42231774	1.350175599	1.14E-30	6.32E-30	up regulation
USP30-AS1	0.427467299	1.089200655	1.349383791	1.07E-08	1.87E-08	up regulation
NLRP6	0.0960527	0.244739096	1.349346501	0.000220023	0.000293807	up regulation
PLA2G2D	0.909912076	2.317706939	1.348899106	0.001353176	0.001709441	up regulation
CBLC	5.294201984	13.48394349	1.348757344	6.47E-29	3.27E-28	up regulation
PANO1	0.171149465	0.435663482	1.347957411	7.20E-33	4.54E-32	up regulation
MDK	33.8826384	86.21708095	1.347427498	1.86E-18	5.48E-18	up regulation
AL121832.3	0.10349964	0.263264485	1.346887169	3.26E-23	1.22E-22	up regulation
C2CD4D	0.499810367	1.270940924	1.34644424	1.67E-18	4.93E-18	up regulation
KRT10	7.755039673	19.67460511	1.343128613	2.34E-16	6.15E-16	up regulation
CHAF1B	1.823657179	4.625048038	1.342633801	6.52E-39	5.90E-38	up regulation
DHCR24-DT	0.174121009	0.441504849	1.342338999	1.16E-25	4.91E-25	up regulation
RPUSD1	4.468304469	11.32835117	1.342138494	3.82E-47	6.24E-46	up regulation
TTLL12	9.865641062	25.00710648	1.341853431	1.29E-33	8.55E-33	up regulation
FZD2	1.526004952	3.867145145	1.34150927	2.85E-31	1.64E-30	up regulation
MICB	1.528145488	3.869081629	1.340209264	1.02E-20	3.38E-20	up regulation
TRIM11	2.149668404	5.439096136	1.339252791	1.09E-53	3.47E-52	up regulation
AL391001.1	1.592153735	4.027952941	1.339067182	3.10E-11	6.24E-11	up regulation
RAC3	5.70190354	14.42341081	1.338896831	1.14E-28	5.68E-28	up regulation
AKAP5	0.617592194	1.560037498	1.336854283	6.34E-12	1.32E-11	up regulation
PSME2P2	0.603061191	1.523008166	1.336547377	2.36E-33	1.53E-32	up regulation
GPR137C	0.280419066	0.708040803	1.336248058	3.21E-28	1.56E-27	up regulation
CYFIP2	1.887189491	4.765024408	1.336244314	2.28E-17	6.32E-17	up regulation
AC099518.1	0.178136731	0.449748361	1.336132999	4.88E-15	1.19E-14	up regulation
GRB7	7.542028268	19.03891688	1.335926943	0.000275482	0.000365234	up regulation
LINC02332	0.086583093	0.218412306	1.334896895	0.001260083	0.001596163	up regulation
CENPN	1.245824758	3.137602162	1.332561287	1.21E-31	7.06E-31	up regulation
PGP	3.31230508	8.332501121	1.330914048	3.93E-52	1.05E-50	up regulation
C4B	4.529477782	11.39369287	1.33081879	5.35E-07	8.46E-07	up regulation
AL354732.1	0.107047863	0.269242998	1.330652832	2.22E-16	5.84E-16	up regulation
ATP6V0B	16.93121822	42.55744931	1.329725905	5.74E-55	2.09E-53	up regulation
AL138760.1	0.16780649	0.421713048	1.329463144	1.07E-05	1.56E-05	up regulation
YDJC	4.463711519	11.21344983	1.328914496	1.27E-38	1.13E-37	up regulation
GNG8	0.177280965	0.445233736	1.328525275	1.59E-13	3.60E-13	up regulation
AC011503.2	0.369257687	0.927311223	1.328425659	2.60E-22	9.30E-22	up regulation
PLAU	13.30588376	33.36332866	1.326198898	1.14E-18	3.38E-18	up regulation
LINC00589	0.103442732	0.259312775	1.325860999	6.65E-08	1.11E-07	up regulation
AC007490.1	0.535091093	1.341062029	1.325519548	5.53E-08	9.29E-08	up regulation
CLDN3	26.90484123	67.40716428	1.325036141	1.20E-15	3.02E-15	up regulation
CACNA1D	1.049720567	2.627999417	1.323959618	1.38E-09	2.54E-09	up regulation
AL449106.1	0.128979847	0.322810562	1.323542123	5.01E-14	1.17E-13	up regulation
VAV3	11.29125227	28.24572478	1.322827022	8.21E-18	2.34E-17	up regulation
CCND1	51.86261662	129.711562	1.32254018	3.17E-11	6.36E-11	up regulation
ZNF469	0.91260613	2.280567764	1.321328789	1.09E-18	3.24E-18	up regulation
AC116347.1	0.398780709	0.996206389	1.320849044	4.89E-28	2.36E-27	up regulation
TMEM8A	6.987755062	17.45457428	1.320704225	1.65E-52	4.59E-51	up regulation
EFR3B	0.437836843	1.093400555	1.320356748	5.53E-12	1.15E-11	up regulation
CBARP	0.114165346	0.285053091	1.320105847	5.33E-23	1.97E-22	up regulation
KRT8P3	1.203365599	3.003729291	1.319679777	6.77E-14	1.56E-13	up regulation
AP006621.4	0.207425516	0.517672008	1.319444933	4.64E-11	9.24E-11	up regulation
ZSCAN1	0.249008577	0.621421788	1.319377388	0.001151319	0.001462488	up regulation
AL121929.2	0.260536506	0.649753834	1.318407709	0.034430637	0.038781291	up regulation
AL031009.1	0.116861254	0.291424877	1.318327357	3.93E-14	9.20E-14	up regulation
BBC3	1.700809807	4.241413074	1.318323174	7.22E-29	3.64E-28	up regulation
INSYN1	0.378109805	0.942849385	1.318222066	0.007238388	0.008624264	up regulation
ADAP1	0.443791638	1.106446427	1.317979208	7.93E-19	2.38E-18	up regulation
EPHA10	0.437391539	1.090339394	1.317780059	7.14E-21	2.38E-20	up regulation
TTC39A	5.931656926	14.78073801	1.317211243	1.54E-20	5.04E-20	up regulation
RNU6-341P	0.223055313	0.555695036	1.316891839	0.02495858	0.028468788	up regulation
TDRKH-AS1	0.372891432	0.928656272	1.316389056	1.82E-36	1.41E-35	up regulation
SLC27A2	3.317171439	8.261119243	1.31638368	8.12E-05	0.000111612	up regulation
RARRES3	40.69834121	101.3291655	1.316007585	7.39E-13	1.62E-12	up regulation
ADAM12	4.630759891	11.52662713	1.31564956	4.16E-19	1.27E-18	up regulation
ANGPTL6	0.087316101	0.217303103	1.315389166	2.43E-27	1.12E-26	up regulation
AC144450.1	0.434176916	1.080236333	1.314992049	1.56E-09	2.85E-09	up regulation
BBOX1-AS1	0.090845843	0.225960629	1.314579024	3.95E-05	5.55E-05	up regulation
NUDT16L1	7.940840549	19.72912401	1.312963269	2.42E-46	3.71E-45	up regulation
DRAIC	0.91272276	2.26706137	1.312574833	2.32E-05	3.31E-05	up regulation
FXYD3	27.99076171	69.48027144	1.311652643	5.78E-24	2.25E-23	up regulation
NAXE	27.49913265	68.24333271	1.311301988	2.44E-54	8.34E-53	up regulation
SPAG1	1.649158661	4.090503867	1.310548362	6.17E-35	4.37E-34	up regulation
FAM171A2	0.454606417	1.127566069	1.310522015	2.48E-13	5.56E-13	up regulation
PGAP3	10.28951201	25.49886093	1.309258239	1.25E-09	2.29E-09	up regulation
AC012213.3	0.128508859	0.318232583	1.308213746	8.35E-28	3.98E-27	up regulation
GAS2L3	0.596949371	1.477882219	1.307850815	3.90E-30	2.09E-29	up regulation
PPP4C	19.40790437	48.03711221	1.307505078	4.97E-56	2.12E-54	up regulation
AC022211.1	0.160967761	0.398388596	1.307404583	1.65E-13	3.74E-13	up regulation
AC009119.1	0.730463399	1.807784599	1.307338897	8.25E-09	1.45E-08	up regulation
NVL	4.371725531	10.80973064	1.306055842	8.43E-53	2.42E-51	up regulation
MIR548AA1	0.203438647	0.502990174	1.305936445	5.43E-08	9.12E-08	up regulation
IL24	0.898961207	2.222458718	1.305825856	3.11E-13	6.94E-13	up regulation
CTSD	147.8167646	365.3863752	1.305612937	1.73E-29	8.98E-29	up regulation
AC087442.1	0.146588596	0.362293554	1.305386265	0.022111931	0.0253184	up regulation
NKILA	0.746572596	1.844109951	1.304570217	2.29E-29	1.18E-28	up regulation
CTPS1	2.948611602	7.282006653	1.304300259	4.78E-39	4.38E-38	up regulation
AC093249.2	0.127231396	0.314097059	1.303755718	1.03E-21	3.56E-21	up regulation
HSPB1P2	0.194368111	0.479831163	1.303735315	1.33E-19	4.15E-19	up regulation
LINC01426	0.225345442	0.55621499	1.303504357	4.59E-12	9.60E-12	up regulation
NCR3LG1	0.2323025	0.573280644	1.303236889	1.63E-05	2.35E-05	up regulation
CERS2	31.09811013	76.73983023	1.303148665	1.07E-45	1.55E-44	up regulation
TNFRSF4	0.954497427	2.354230505	1.30244237	3.02E-19	9.26E-19	up regulation
C1orf112	0.999638587	2.465191752	1.302221373	1.56E-45	2.23E-44	up regulation
MZT2A	3.989732263	9.836747747	1.301889471	7.71E-29	3.87E-28	up regulation
AL445490.1	0.147585597	0.363857808	1.301822829	0.000155432	0.000209762	up regulation
ADCK5	1.797497939	4.43032615	1.301422794	7.90E-32	4.68E-31	up regulation
MRPL14	21.21205531	52.2707437	1.301119271	1.95E-50	4.40E-49	up regulation
AC053503.2	0.136803176	0.337014647	1.30070957	3.62E-24	1.42E-23	up regulation
MMP25	0.631940522	1.556125596	1.300097823	5.23E-05	7.28E-05	up regulation
ABRACL	14.87337532	36.62390252	1.300053443	5.69E-34	3.83E-33	up regulation
MMEL1	0.401953802	0.989669341	1.299916889	5.44E-18	1.56E-17	up regulation
RPL29P14	0.257388651	0.633639633	1.299714137	0.024241615	0.027666315	up regulation
CENPP	0.51484271	1.266858132	1.29905133	1.18E-32	7.33E-32	up regulation
GDNF	0.166463692	0.409240563	1.297741606	0.000735427	0.000947112	up regulation
ABHD17C	3.914845025	9.624306848	1.297727443	1.57E-31	9.16E-31	up regulation
TMEM63B	7.810375097	19.18802611	1.296742567	1.94E-57	1.04E-55	up regulation
ITIH6	0.592147504	1.454584197	1.296578306	1.31E-07	2.15E-07	up regulation
RHCE	0.238046943	0.584613052	1.296235935	1.12E-17	3.16E-17	up regulation
GAPDHP71	0.087522416	0.214765214	1.295035863	5.96E-09	1.06E-08	up regulation
FBXL19-AS1	0.612850599	1.503596544	1.294810184	8.58E-23	3.14E-22	up regulation
BAMBI	16.44161686	40.32926444	1.294474913	2.79E-07	4.48E-07	up regulation
SPINT2	45.65752865	111.9767643	1.29427472	3.21E-41	3.41E-40	up regulation
MZT2B	15.93876146	39.0841916	1.294045671	2.82E-25	1.17E-24	up regulation
BRWD1-AS1	0.094269872	0.231119144	1.293768087	7.17E-07	1.12E-06	up regulation
AC016205.1	0.22645601	0.555184003	1.293735172	1.17E-12	2.53E-12	up regulation
SLC52A3	3.034373658	7.437764823	1.293470379	6.70E-25	2.73E-24	up regulation
TEX22	0.150331489	0.368438125	1.293275119	1.70E-14	4.06E-14	up regulation
MMP14	44.03623766	107.8275946	1.291963312	2.67E-27	1.23E-26	up regulation
FAM129C	0.108042574	0.264526137	1.291810355	0.003136668	0.003854946	up regulation
LMNTD2	0.598743628	1.46578166	1.291659916	2.75E-13	6.14E-13	up regulation
RNF144A-AS1	0.149751366	0.366477681	1.29115618	2.77E-17	7.64E-17	up regulation
AL390719.1	0.733720054	1.795400213	1.29100385	3.01E-18	8.77E-18	up regulation
AC138811.2	0.095815785	0.234406424	1.290676859	1.20E-21	4.15E-21	up regulation
EPCAM	40.98452534	100.2642782	1.290656504	5.14E-33	3.26E-32	up regulation
SFXN5	1.293895205	3.164844785	1.290413971	1.92E-21	6.56E-21	up regulation
CLEC7A	1.38517381	3.382470571	1.288010367	1.13E-12	2.44E-12	up regulation
IDH2	34.93087982	85.28995276	1.28787282	2.60E-38	2.25E-37	up regulation
SLC35A2	7.463220991	18.21566114	1.287309048	1.43E-60	1.69E-58	up regulation
PTPN7	0.759542111	1.853691399	1.287199227	1.51E-14	3.62E-14	up regulation
ADAMTS6	0.200572754	0.489249038	1.286443373	6.69E-21	2.23E-20	up regulation
AC007285.2	0.107066397	0.261068881	1.285924737	8.88E-13	1.93E-12	up regulation
COX20P1	0.938909924	2.288894342	1.285592206	4.95E-07	7.83E-07	up regulation
PPFIA3	1.057027874	2.574271533	1.284150815	1.03E-21	3.56E-21	up regulation
AIFM3	0.167452706	0.407726403	1.283847696	1.07E-20	3.55E-20	up regulation
PRR15L	15.43414881	37.56551959	1.283283136	2.95E-22	1.05E-21	up regulation
AL121899.1	0.248223446	0.604070748	1.283078137	5.33E-06	7.93E-06	up regulation
RUNX2	1.172102863	2.851677799	1.282711801	2.04E-22	7.34E-22	up regulation
SERINC2	23.84575008	58.01544361	1.28270483	1.49E-28	7.40E-28	up regulation
LRRC6	1.660523299	4.038906724	1.282326863	6.72E-13	1.47E-12	up regulation
IDH2-DT	0.176997179	0.430295467	1.281601275	5.60E-06	8.33E-06	up regulation
JPT2	22.99770404	55.85513644	1.28020012	6.42E-52	1.68E-50	up regulation
GPR160	5.017115073	12.18400838	1.280058906	1.03E-23	3.95E-23	up regulation
EPS8L1	3.226158231	7.832337893	1.279625806	9.35E-23	3.41E-22	up regulation
AC023024.2	0.548084678	1.330401089	1.279390545	1.07E-07	1.76E-07	up regulation
AKR7L	0.29715682	0.721108499	1.278991851	9.41E-11	1.84E-10	up regulation
TEDC1	0.819573359	1.988600286	1.278808325	8.61E-29	4.31E-28	up regulation
TRPM2-AS	0.748796809	1.816543874	1.278550018	7.75E-09	1.36E-08	up regulation
ABHD11	11.01276388	26.71536178	1.278492967	2.33E-35	1.69E-34	up regulation
CDK5R1	0.649817531	1.574767666	1.277032425	4.02E-29	2.05E-28	up regulation
LAPTM4B	30.7648033	74.53801848	1.276695698	1.67E-12	3.59E-12	up regulation
AC078778.1	0.27211293	0.658697814	1.275411253	3.32E-19	1.02E-18	up regulation
MAZ	9.398654248	22.743557	1.2749318	1.49E-53	4.65E-52	up regulation
SLC2A10	7.942232786	19.21693005	1.274761328	1.98E-20	6.44E-20	up regulation
QPCT	2.598654039	6.28703005	1.274614079	1.27E-10	2.47E-10	up regulation
WDR76	1.642652015	3.973497356	1.274382497	2.62E-40	2.63E-39	up regulation
COA6	8.042643513	19.44523523	1.273675008	2.65E-54	8.98E-53	up regulation
AL139393.2	1.266662325	3.062425823	1.273642927	2.98E-21	1.01E-20	up regulation
SP140	0.392655193	0.94915526	1.273381123	1.53E-13	3.47E-13	up regulation
AZGP1P1	1.592389244	3.848000725	1.272916039	5.08E-09	9.04E-09	up regulation
IL9RP3	0.108767021	0.262733486	1.272358894	2.66E-15	6.61E-15	up regulation
SRCIN1	1.076095568	2.599375549	1.272358876	8.97E-16	2.28E-15	up regulation
AGMAT	0.458887432	1.107706194	1.271363075	3.12E-33	2.00E-32	up regulation
PPFIA4	0.22632762	0.54625487	1.271161582	1.00E-07	1.65E-07	up regulation
AC011445.1	0.141342821	0.341031879	1.270708001	2.93E-15	7.26E-15	up regulation
KCNJ11	2.39690831	5.782550465	1.27053123	1.30E-15	3.28E-15	up regulation
CLCN2	1.055153486	2.543293146	1.269244887	9.20E-45	1.24E-43	up regulation
GOLM1	27.70217942	66.77168355	1.269236934	1.56E-25	6.56E-25	up regulation
LRRC59	19.81113117	47.74969812	1.269180355	7.65E-51	1.81E-49	up regulation
TRBV18	0.266439262	0.642107094	1.269007247	3.91E-05	5.50E-05	up regulation
SNX22	0.65255122	1.572287797	1.268702267	5.28E-11	1.05E-10	up regulation
MTX1P1	1.813655868	4.368885564	1.268364579	2.31E-37	1.88E-36	up regulation
AC109446.3	0.095367494	0.229677657	1.268041005	1.58E-05	2.29E-05	up regulation
AC023983.2	0.145266371	0.349317561	1.265838415	3.41E-05	4.81E-05	up regulation
COX17P1	0.215362013	0.517670808	1.265271167	3.92E-14	9.16E-14	up regulation
MIR342	0.212474555	0.510617079	1.264951714	1.16E-06	1.80E-06	up regulation
OLFML2B	9.214511938	22.14285276	1.264861444	1.39E-26	6.20E-26	up regulation
AC126474.1	0.151580394	0.364234015	1.264782492	6.28E-38	5.30E-37	up regulation
ELF3-AS1	0.661607524	1.586849651	1.262117898	1.47E-32	9.08E-32	up regulation
CCDC114	0.211587247	0.507446034	1.262001732	1.34E-09	2.46E-09	up regulation
TTYH3	7.942156717	19.029883	1.260663958	5.69E-39	5.18E-38	up regulation
NECTIN2	27.31331569	65.42142005	1.260158615	3.79E-40	3.75E-39	up regulation
SRARP	3.257008219	7.797752249	1.259510958	0.033375542	0.037634045	up regulation
FLAD1	7.088488142	16.96693686	1.259176268	6.03E-60	5.73E-58	up regulation
RAPGEFL1	1.811841212	4.327301843	1.256011233	0.000725132	0.000934502	up regulation
ABAT	3.218116305	7.685829444	1.255984495	5.57E-06	8.29E-06	up regulation
AC023908.3	0.127867215	0.30520976	1.255154688	1.54E-15	3.87E-15	up regulation
SNORD72	0.223705875	0.533948431	1.255097266	1.65E-06	2.53E-06	up regulation
P2RY10	0.710815273	1.696375091	1.254908619	9.30E-06	1.36E-05	up regulation
PAGR1	2.867681248	6.843755189	1.254903481	2.92E-35	2.10E-34	up regulation
CFAP61	0.123458319	0.294482774	1.254159197	1.58E-09	2.88E-09	up regulation
GPSM2	1.426762758	3.402455832	1.253830971	8.22E-34	5.48E-33	up regulation
PFKFB4	0.957249574	2.282524749	1.253663485	9.46E-43	1.11E-41	up regulation
AC139100.1	0.363845911	0.866535656	1.251931518	8.64E-08	1.43E-07	up regulation
CANT1	16.95609324	40.37710352	1.251733617	6.74E-40	6.55E-39	up regulation
RASGRF1	0.181316673	0.431708138	1.251544692	0.039211219	0.043960212	up regulation
RTN4R	0.725651908	1.72655227	1.250544447	6.73E-24	2.60E-23	up regulation
NREP	3.506549454	8.342316839	1.250396031	1.01E-36	7.94E-36	up regulation
GRIK4	0.172644425	0.410724047	1.250365668	0.000460506	0.000601629	up regulation
SNRPEP2	1.184807276	2.817475624	1.249750723	4.41E-41	4.65E-40	up regulation
AL592148.1	0.092434988	0.219753477	1.249375054	1.96E-05	2.81E-05	up regulation
B4GALNT1	0.330231395	0.784750345	1.248756475	0.000450452	0.000588784	up regulation
CENPO	1.132249782	2.689962495	1.248393796	9.94E-47	1.58E-45	up regulation
AC245884.10	0.109651121	0.260377945	1.247686692	0.006697553	0.008003034	up regulation
AL121832.2	1.132308433	2.688555673	1.247564355	5.22E-16	1.34E-15	up regulation
OAZ3	0.656277429	1.558019994	1.247336026	2.39E-28	1.17E-27	up regulation
TSTD1	25.82458546	61.30557272	1.247273031	1.00E-32	6.27E-32	up regulation
AC112484.3	0.351107568	0.833331555	1.246977517	7.40E-16	1.89E-15	up regulation
HES4	2.942226796	6.983039362	1.246946646	2.60E-13	5.83E-13	up regulation
AC093840.1	0.13451279	0.319209816	1.246761663	7.60E-16	1.94E-15	up regulation
IQCD	0.621567765	1.475007422	1.246738622	4.01E-30	2.15E-29	up regulation
AC074135.1	0.403950131	0.957312841	1.244813261	0.001254626	0.001589577	up regulation
AP001610.1	0.089614213	0.212355654	1.244683054	0.000260878	0.000346392	up regulation
TRAV41	0.182669945	0.432391822	1.243099949	0.000254113	0.000337893	up regulation
MZB1	5.257953245	12.44279024	1.242736822	0.001708397	0.00214194	up regulation
HOMER3	4.265304	10.08906206	1.242071583	1.52E-27	7.12E-27	up regulation
LPCAT1	7.053872838	16.68264514	1.241860582	1.59E-46	2.49E-45	up regulation
NR2F6	11.30596195	26.72841199	1.241290379	6.38E-49	1.24E-47	up regulation
TREM1	0.345798127	0.817445725	1.24119289	4.17E-13	9.22E-13	up regulation
IER3	36.96020388	87.33311362	1.240556062	2.92E-18	8.51E-18	up regulation
TMEM45A	2.716309273	6.414833093	1.239763978	2.03E-07	3.30E-07	up regulation
DNAI1	0.272349491	0.643066338	1.239508399	3.30E-05	4.67E-05	up regulation
PAXX	9.627008345	22.73100612	1.239502096	7.55E-33	4.75E-32	up regulation
AP000695.1	0.342646794	0.808812252	1.239082666	2.40E-19	7.40E-19	up regulation
AL157373.2	0.109155278	0.257651545	1.239039347	0.000564221	0.000732839	up regulation
MIR3174	0.159967566	0.377559665	1.238925221	0.013986835	0.016256132	up regulation
AC010326.3	4.723893706	11.14688407	1.238592077	1.13E-20	3.72E-20	up regulation
ALYREF	17.24328116	40.68288544	1.238387681	5.54E-39	5.05E-38	up regulation
SOWAHD	0.278482677	0.656796627	1.237859132	2.10E-26	9.25E-26	up regulation
OSCAR	1.144660765	2.698985018	1.237496868	3.21E-29	1.65E-28	up regulation
CYB561	17.58240417	41.45610376	1.237452177	4.66E-40	4.57E-39	up regulation
AC096537.1	0.150559056	0.354786981	1.236623583	8.24E-15	2.00E-14	up regulation
AC103760.1	0.953244316	2.246087968	1.236496504	1.65E-11	3.36E-11	up regulation
SNORD88A	0.114443417	0.269621033	1.236298566	1.44E-05	2.08E-05	up regulation
AC005828.4	0.112894205	0.26594679	1.236166194	1.99E-14	4.73E-14	up regulation
TRAIP	0.913950013	2.152934695	1.236117392	1.42E-41	1.54E-40	up regulation
HOXA11	0.212762605	0.500957914	1.2354448	0.000225798	0.000301325	up regulation
FLT3	0.770293534	1.813096784	1.234975718	0.004998766	0.006042078	up regulation
TMED3	3.949163458	9.290275467	1.234174292	1.29E-45	1.86E-44	up regulation
TRBV5-6	0.230636954	0.542546727	1.23412371	0.000165821	0.000223344	up regulation
TRPM2	1.348959082	3.172988756	1.233995821	1.41E-25	5.95E-25	up regulation
SIX1	2.448408213	5.75848578	1.233845385	9.04E-06	1.33E-05	up regulation
FKBP10	17.53220025	41.22162098	1.233394176	8.04E-33	5.06E-32	up regulation
DCTPP1	15.36672245	36.11598085	1.232827865	5.90E-49	1.15E-47	up regulation
AC011445.2	0.6623278	1.556577366	1.232759965	7.33E-11	1.44E-10	up regulation
AP001453.3	0.640132606	1.504405498	1.232750783	3.30E-37	2.67E-36	up regulation
TMEM54	16.44239496	38.60901584	1.231517326	2.28E-39	2.13E-38	up regulation
RN7SL221P	0.161884737	0.37984448	1.230441883	1.64E-08	2.84E-08	up regulation
TBX1	1.209795807	2.838582688	1.230407202	0.006303471	0.007548687	up regulation
CCDC194	0.110615407	0.259335465	1.229267168	0.000593288	0.000769298	up regulation
[truncated: 2,576 more rows]
