# Supplementary material for: Identification and Validation of an Immunological Expression-Based Prognostic Signature in Breast Cancer
Source: Front Genet. 2020 Sep 16;11:912. doi: 10.3389/fgene.2020.00912 (PMC7526716; doi:10.3389/fgene.2020.00912)
Supplement: Supplementary file 8 [file Data_Sheet_3.XLS]

## Sheet: immuneGeneExp
ID	TCGA-BH-A209-11A-42R-A157-07	TCGA-BH-A0AU-11A-11R-A12P-07	TCGA-BH-A0AZ-11A-22R-A12P-07	TCGA-BH-A1FE-11B-14R-A13Q-07	TCGA-BH-A1FB-11A-33R-A13Q-07	TCGA-BH-A0DT-11A-12R-A12D-07	TCGA-BH-A0H7-11A-13R-A089-07	TCGA-E2-A1LS-11A-32R-A157-07	TCGA-BH-A0DZ-11A-22R-A089-07	TCGA-E2-A1IG-11A-22R-A144-07	TCGA-A7-A0D9-11A-53R-A089-07	TCGA-E9-A1ND-11A-43R-A144-07	TCGA-GI-A2C9-11A-22R-A21T-07	TCGA-BH-A18R-11A-42R-A12D-07	TCGA-GI-A2C8-11A-22R-A16F-07	TCGA-BH-A0DK-11A-13R-A089-07	TCGA-E9-A1R7-11A-42R-A14M-07	TCGA-BH-A208-11A-51R-A157-07	TCGA-BH-A18K-11A-13R-A12D-07	TCGA-BH-A0B5-11A-23R-A12P-07	TCGA-AC-A23H-11A-12R-A157-07	TCGA-BH-A1FR-11B-42R-A13Q-07	TCGA-E9-A1N5-11A-41R-A14D-07	TCGA-E9-A1NF-11A-73R-A14D-07	TCGA-A7-A0DC-11A-41R-A089-07	TCGA-E2-A15I-11A-32R-A137-07	TCGA-BH-A1EO-11A-31R-A137-07	TCGA-A7-A0CH-11A-32R-A089-07	TCGA-BH-A1FG-11B-12R-A13Q-07	TCGA-BH-A0B3-11B-21R-A089-07	TCGA-BH-A0BW-11A-12R-A115-07	TCGA-BH-A0DG-11A-43R-A12P-07	TCGA-BH-A1EN-11A-23R-A13Q-07	TCGA-E9-A1RC-11A-33R-A157-07	TCGA-BH-A203-11A-42R-A169-07	TCGA-A7-A0CE-11A-21R-A089-07	TCGA-BH-A1EV-11A-24R-A137-07	TCGA-BH-A1FU-11A-23R-A14D-07	TCGA-E9-A1RH-11A-34R-A169-07	TCGA-BH-A18N-11A-43R-A12D-07	TCGA-E2-A15M-11A-22R-A12D-07	TCGA-BH-A0HK-11A-11R-A089-07	TCGA-BH-A0BM-11A-12R-A089-07	TCGA-BH-A0H5-11A-62R-A115-07	TCGA-BH-A0H9-11A-22R-A466-07	TCGA-BH-A0DV-11A-22R-A12P-07	TCGA-E2-A1LB-11A-22R-A144-07	TCGA-BH-A0C0-11A-21R-A089-07	TCGA-E2-A1LH-11A-22R-A14D-07
CALR	202.722	198.756	157.111	97.7134	163.329	170.711	247.588	128.366	283.498	196.741	166.184	259.123	173.464	120.326	36.8156	332.724	146.109	163.054	142.495	125.443	149.226	220.388	233.614	186.738	186.239	84.6424	205.114	246.075	84.4032	169.497	227.825	160.119	185.448	156.223	121.013	302.385	138.986	186.679	137.553	192.296	133.333	234.361	192.476	136.041	168.538	177.076	197.18	183.021	195.737
CD1A	0.101613	0.0191139	0.100529	0.00769002	0.0115516	0.110864	0.0510301	0.0189634	0.0590439	0.0326267	0.062048	0.362009	0.0850791	0.0281616	0.00569541	0	0.0693593	0.0701477	0.010677	0.0223005	0.0825308	0.387188	0.0157459	0.0272867	0.192836	0.0576634	0.0791048	0.245247	0.0795005	0.112666	2.93356	0.151164	0.035651	0.0616834	0.0620049	0.0983315	0.372299	0.113065	0.0444055	0.0607137	0.0588834	0.0807874	0.255365	0.268088	0.116577	0.00753118	0.0185693	0.214518	0.344752
HLA-DQA2	11.9068	9.43734	3.42689	15.103	18.4609	3.15504	4.44493	2.92975	1.16393	2.4979	22.7848	2.72525	8.23957	8.46283	0.125329	5.68728	2.60738	8.55742	6.43177	6.37947	9.65755	3.10109	16.9131	12.8472	0.530425	7.89096	3.81422	4.39538	10.431	0.807966	77.2989	12.7027	13.2795	2.61291	3.70955	9.60191	0.237465	1.52046	2.49378	1.08552	11.0678	3.41105	14.4373	15.736	19.5764	1.55368	1.94095	1.47516	1.04312
HLA-G	1.97317	2.80643	0.341478	0.246848	1.57935	2.39275	0.141561	0.450905	0.690264	2.39201	1.47536	3.09199	3.03447	1.13835	0.331787	1.0019	0.568058	1.10918	0.609299	0.530254	0.302535	1.76005	2.93904	1.914	1.39848	1.17686	1.8588	3.60818	0.633262	2.93725	2.39055	2.38124	1.73072	1.43735	0.469943	1.92058	0.519597	1.55331	0.853486	0.8752	0.840065	2.61247	1.60474	1.2066	3.53419	0.931184	2.47259	1.4282	1.20228
HSPA6	1.07194	0.802605	0.330086	0.197145	0.357411	0.738809	0.766893	26.5541	1.2179	0.865276	1.32427	3.40233	1.46035	0.535249	0.337333	0.462002	1.3353	0.979783	0.556881	0.624276	0.370872	0.765097	0.66814	1.91367	0.664832	0.101951	1.7647	0.962059	0.238951	1.32323	1.84623	0.72161	0.719616	1.14511	0.472764	1.25423	1.39279	0.732976	1.1842	0.905712	0.589943	1.48548	1.33029	0.710981	0.412222	0.339542	0.40218	5.05066	0.650167
LTA	0.384192	0.184514	0.259942	0.399013	0.348475	0.0411621	0.277096	0.0686481	0.10687	0.11811	0.085568	0.218414	0.145439	0.084955	0.013745	0.0945948	0.158089	0.0931102	0.10307	0.0538191	0.141083	0.357279	0.152002	0.098779	0	0.0695812	0.241443	0.508637	0.18227	0.281613	2.86002	0.191527	0.215097	0.074432	0.0561149	0.101704	0.130216	0.227389	0.0714442	0.146524	0.21316	0.146227	0.253117	0.161748	0.0562682	0.0817894	0.15685	0.0862846	0.318937
MICB	2.83671	2.20502	1.18878	1.05996	1.47972	1.78874	5.65122	0.435638	1.03941	0.635463	1.12881	2.46206	1.51898	1.02843	0.294386	1.53662	1.18925	1.05622	0.759832	0.629239	0.767652	2.78955	1.61596	1.60119	1.654	0.763131	2.14374	1.31472	2.66803	2.12805	3.94395	1.55702	1.98963	0.961114	1.20185	1.15227	1.37829	2.01393	0.892596	2.26268	2.21285	0.919879	1.1546	0.961098	1.0916	0.81804	1.1476	1.39806	2.023
PSMD3	15.2571	22.4727	18.2251	13.3323	17.442	19.4734	28.266	16.9831	24.7354	18.8368	18.0699	22.4616	17.5278	18.1367	20.6936	25.3771	14.6008	19.6701	18.0827	19.4695	13.791	15.7572	21.3219	18.6995	22.3791	12.0157	16.4609	22.4193	8.47935	20.5103	23.0712	16.4101	16.3629	18.0024	14.2097	24.1762	21.124	20.3534	14.303	19.2685	15.2824	22.8139	20.8603	19.85	20.6885	18.8349	26.5407	19.6192	21.6508
PSME2	31.7946	17.7609	14.0086	13.4364	19.3859	16.9465	23.908	9.12493	32.2749	14.0768	11.3849	23.6245	17.9595	13.7268	5.34891	20.2751	10.8498	16.4105	14.9818	8.92558	16.5201	19.491	23.7989	10.8947	13.0158	8.5985	17.8753	22.8309	12.0299	27.9338	30.2105	14.9531	17.433	11.5934	13.4697	31.5146	17.2796	15.724	12.0305	15.041	12.6452	21.4003	21.6188	16.6788	15.6962	14.8114	18.7163	21.7576	22.3383
TAP1	30.6492	9.86252	7.35766	6.83742	11.72	8.50393	13.0409	6.46248	13.1695	11.7013	9.70748	13.1766	17.084	7.84896	2.94658	7.86622	8.42229	7.76257	8.03163	7.72224	6.02058	13.7281	16.5521	10.8773	7.60604	9.42066	13.2918	14.2601	4.63355	19.5463	36.762	9.77236	15.3051	7.56582	8.44556	14.5609	9.85175	10.9284	8.00013	10.4518	17.0428	13.2712	11.0778	10.0911	14.6564	6.79619	13.3605	13.6257	11.6487
IFI30	0.274704	0.153404	0.103128	0.123437	0.243975	0.100865	0.172445	0.0373815	0.241094	0.192946	0.232143	0.901402	0.569023	0.047583	0.0144348	0.0993417	0.247406	0.160008	0.153343	0.0565198	0.0697237	0.740796	0.558702	0.414943	0.0733102	0.0324769	0.231937	0.233088	0.0268655	0.435119	0.73037	0.159633	0.0853364	0.151123	0.0785745	0.255151	0.118517	0.19104	0.0625245	0.243638	0.182402	0.156977	0.0616392	0.113243	0.0295459	0.146338	0.0941262	0.151024	0.291253
CD209	6.4575	0.962303	1.32669	1.67282	1.99161	1.61208	0.97353	1.15888	2.35566	4.75739	9.71258	15.3886	6.76854	1.86925	0.505852	0.43439	19.5352	1.2494	2.4088	5.12293	7.02639	4.04578	3.96369	30.0804	7.01574	1.71174	15.7536	9.1002	1.41976	2.6259	2.30222	2.45546	6.73926	10.5821	1.64551	9.31069	6.74763	2.6612	8.30277	11.1958	4.54468	3.93684	0.316215	1.44612	2.98994	0.325508	0.189623	0.397361	0.507605
ULBP2	0.431542	0.118792	0.256609	0.131432	0.502548	0.291507	0.237863	0.333928	0.397536	0.388651	0.137724	0.296037	0.4847	0.273475	0.176984	0.822165	0.203559	0.239781	0.182483	0.150147	0.288521	0.69006	0.171255	0.268512	0.239694	0.328512	0.260277	0.333419	0.654674	0.16255	0.618802	0.0822047	0.22157	0.402529	0.252892	0.294651	0.259887	0.117116	0.12649	0.353751	0.457448	0.552301	0.609327	0.163641	0.271695	0.491464	0.216389	0.277755	0.232118
ULBP1	0.397674	0.0573781	0.0431114	0.0615593	0.138707	0.0341336	0.0567362	0.0126503	0.0328231	0.021765	0.0118262	0.0381305	0.0851332	0.0751455	0.0721877	0.169959	0.066833	0.0701923	0.0427353	0.00991765	0.0963472	0.0683708	0.0735275	0.0364055	0.109343	0.0256445	0.0124165	0.0613508	0.21744	0.0536845	0.226799	0.0352941	0.0237825	0.0658375	0.0775554	0.00468543	0.0863852	0.016761	0.0246854	0.141755	0.0720144	0.0538925	0.115596	0.0383226	0.0311069	0.266271	0.080518	0.0954019	0.0459962
CAMP	0.076235	0.0806631	0.101011	0	0.0649988	0.143957	0.215354	0.0711361	0.553719	0.0305976	0.199506	0.48244	0.0598408	0.0198076	0.0480708	0.661656	0	0.078942	0.030039	0	0.077398	0.160195	0	0.0255897	0.0271264	0.0270386	0.35347	0.10781	0	0.20377	0.464593	0.0425289	0.0334338	0.0173541	0.0218057	0.0592818	0.106261	0.0353444	0	0.0854066	0.082832	0.0227289	0	0.0269373	0.0327979	0.0423768	0.104486	0	0.355642
CXCL10	31.5488	1.39674	1.25422	4.72858	3.62358	1.24636	3.97155	0.721039	0.929574	2.34543	1.83262	4.09201	3.80357	1.26737	0.680117	2.15402	2.41746	2.23795	0.475745	1.05991	1.70386	5.09449	4.40606	1.66975	0.601464	1.09626	1.05327	3.12805	2.93308	13.1241	30.973	2.20926	3.24061	3.0673	1.61624	2.85419	6.34703	5.19467	2.47986	2.9758	2.69368	3.64291	1.25163	7.50854	0.768771	0.442956	3.77297	4.25669	4.15782
CXCL9	40.4354	0.979635	1.37323	3.22366	5.93814	0.567553	7.05904	1.91	0.903329	2.20465	3.73613	6.27451	3.73139	1.55107	0.444391	1.27931	3.64917	1.42737	0.620733	1.3761	2.46745	8.89425	1.95129	2.7205	1.25385	2.50694	1.88656	4.66081	1.58727	11.635	81.2175	1.50326	9.56329	8.89447	1.83797	2.70255	7.5739	11.9069	3.45913	3.80258	5.28512	2.2186	3.59992	5.55174	1.96189	0.564586	4.95748	4.32672	5.71399
CXCL11	4.94873	0.115485	0.291863	0.405491	0.393383	0.15926	0.355035	0.138879	0.194585	0.46594	0.301859	0.533727	0.436157	0.224289	0.0375395	0.20094	0.457161	0.192649	0.0938325	0.253144	0.339985	1.0008	0.363244	0.509581	0.180061	0.390629	0.204469	0.631434	0.890805	2.10404	4.48178	0.107938	1.15533	0.447224	0.315029	0.586396	0.983929	1.60087	0.414637	0.441861	0.754662	0.292867	0.300564	1.14646	0.0768379	0.182011	0.275386	0.557716	0.504961
CXCL12	112.684	40.9955	62.0799	68.6002	78.7082	43.2998	70.9218	55.9266	31.4804	77.6057	68.932	90.5527	105.96	93.3336	14.5777	26.4366	79.4573	79.5101	44.8207	63.2865	144.194	89.1366	29.5385	50.376	82.1038	77.4658	95.9073	82.7212	83.4728	61.4003	61.4187	67.7059	128.263	75.5987	61.7064	70.1464	143.008	67.0358	119.095	90.0288	104.214	91.8959	17.1813	41.4674	72.7243	34.241	36.5867	48.0951	16.972
CXCL13	4.71308	1.30183	4.68032	5.38402	0.490671	0.886862	3.77459	0.0370345	6.87534	35.3318	0.0389496	0.111629	1.06962	3.10396	0.00834212	3.46382	3.32994	1.99327	11.6978	0.0108879	0.11081	0.13344	13.7687	0	0.127102	0.239304	0.0136312	9.85598	0.791827	1.20231	112.898	4.28432	0.322014	0	0.124876	2.80853	0.513698	0.809637	0.368567	0.144508	0.431235	0.437821	0.267168	2.41212	0.221976	2.73569	2.66546	1.72813	4.71297
CXCL2	21.4307	12.593	18.131	56.4999	17.5618	18.2917	7.2851	28.0969	11.0831	17.6435	11.9029	8.30655	73.5494	7.72267	7.44905	15.5	3.81211	18.0944	10.6674	21.6778	13.6946	24.7601	5.61057	3.76203	17.7706	20.3721	20.7742	8.83502	85.4383	25.6838	66.4689	33.7646	6.29347	2.12033	22.3318	23.3878	43.9101	7.10954	0.816982	4.37972	104.139	16.0864	9.1119	36.4708	21.258	14.1647	14.2711	11.2407	21.5013
CXCL3	0.806239	0.857583	0.657915	1.52539	1.14568	0.515537	0.409713	0.71649	0.594892	0.565001	0.812149	0.917847	2.07605	0.691616	0.107594	0.382578	0.458603	1.00052	0.484089	0.38618	0.65613	1.83939	0.7734	0.257742	0.336971	0.526516	1.31419	0.354718	1.5995	1.34546	3.36735	1.37074	0.359199	0.157313	1.14207	0.603726	1.85515	0.474657	0.0838882	0.215056	1.57588	0.579951	0.57718	1.24805	0.308321	0.483733	1.10502	1.22927	1.16146
CCL13	11.913	0.49431	0.459832	0.606093	0.853539	2.33148	4.25239	0.918562	0.605935	1.63397	10.0427	21.6336	6.26899	1.56064	0.504997	0.82059	15.3178	0.328268	0.341866	2.70967	19.0568	5.13282	1.00833	20.8341	6.91054	1.91733	39.2075	10.7406	4.6994	4.0633	2.60781	1.11695	14.2541	7.36837	1.43172	15.5174	6.11311	2.04217	14.8196	7.49553	6.93722	6.92444	0.426794	1.01403	2.23958	0.370984	0.205811	1.65551	0.339647
PENK	0.489046	0.127551	2.9143	0.0653129	0.238266	18.9456	0.485005	0.260764	10.5727	0.626786	1.03246	1.79738	1.18282	0.102507	1.20585	6.12303	1.05193	0.634078	0.356251	0.410372	0.463128	0.94647	153.105	2.60997	1.27514	0.104946	8.49131	1.19955	0.149511	0.258751	0.64233	1.23343	1.33372	1.17501	0.385561	2.44579	5.41404	0.739267	0.628575	0.501841	1.01808	1.77907	0.232378	2.10848	0.686003	0.603087	0.168978	0.0347036	0.0627438
MMP12	0.212148	0	2.02389	0.103212	0.05168	0.0763059	0.466115	0.438337	0.12107	0.0973114	0.971578	0.415549	1.03088	0.637829	0.0063701	0.547996	0.801617	0.502128	0.250779	0.191224	0.0307692	1.22274	2.44795	0.966442	0.970558	0.0967417	0.145725	1.3115	0.515726	1.56615	20.3166	0.380411	0.332286	0.0413943	0.0780189	0.369219	0.464681	0.210765	0.521492	0.135812	0.285389	0.596361	0.642636	0.224885	0.039116	1.16242	0.020769	0.231932	0.437004
S100B	43.9397	10.7074	13.1589	13.4467	23.7606	22.0717	26.8629	133.095	33.6312	85.1672	210.758	38.4184	29.3412	58.9656	0.436942	18.0519	40.059	21.9732	50.6774	229.083	25.0577	17.1435	29.2882	39.9851	41.4791	111.778	30.8491	48.0801	16.5022	27.4216	33.7741	24.6602	111.992	100.618	61.1891	26.7999	36.8098	25.5497	73.7799	29.7707	26.5648	17.7049	31.8422	22.1472	196.117	17.5296	18.3182	17.2544	18.7969
S100P	0.155299	0.406886	0.517366	0.0755544	0.302651	0.167575	5.40366	0.476139	47.3593	0.0890438	2.10465	0.0935984	0.394731	0.161401	0.233156	4.54637	0.176674	0.505414	0.139869	0.170413	0.518053	0.111886	0.0515677	0.238304	13.436	0.173111	1.53917	6.81451	0.0520728	0.724782	1.39976	0.210402	18.613	0.31312	0.101533	1.40316	0.724499	0.164573	0.230261	0.173983	0.353546	2.06371	3.06153	0.344924	0.209983	0.702942	0.334479	0.819636	0.188177
PGLYRP2	0.578996	1.56455	0.575966	0.202237	0.387332	0.639181	1.21341	0.00831185	0.782857	0.250261	0.00582778	0.219218	0.344942	0.509171	0	4.17049	0.167205	1.01463	1.00383	0	0.0406959	0.554049	0.269162	0.00598003	1.08399	0.0631862	0	0.25194	0.0470419	0.275131	0.172435	0.293187	0.0742245	0.00811094	0.137585	1.93949	0.308628	1.04897	0.160573	0.873188	0.367781	0.685183	0.107931	0.472121	0	0.99525	0.256382	1.03898	0.166219
DEFB132	3.20661	0.19833	0.333513	0.174786	1.34702	0.176977	1.36998	6.62767	0.058348	16.7337	16.1438	4.75421	0.812737	5.8164	0	0.161393	24.3323	0.519906	4.8852	32.7847	0.333029	0.393878	0.0933617	4.29644	32.51	5.9643	4.11095	3.88527	9.08193	2.2188	0.470365	0.59753	3.86365	44.9614	12.2395	0.38869	2.08483	0.968348	18.0867	9.82468	2.03663	1.11769	0.639899	2.04373	26.3007	0.379563	0.275256	0.565304	1.03342
LCN12	0.105773	0.994816	0.411104	0.280169	0.455211	0.285335	0.657665	0.0563991	0.314622	0.12938	0.0131812	0.269163	0.353193	0.204154	0.0211734	0.699445	0.0171902	0.505919	0.428687	0.049743	0.0920457	0.728178	0.421469	0.0270512	0.358446	0.0357286	0.0138392	0.165252	0.16551	0.388932	0.339455	0.342803	0.110448	0.0275179	0.144069	0.590119	0.353038	0.270882	0.0935472	0.643276	0.11675	0.126142	0.135622	0.548158	0.0346711	0.229585	0.255424	0.191399	0.384498
PGLYRP4	0.0187484	0.00881661	0.0264976	0	0	0.0236021	0.0392309	0.00583147	0.0726268	0.0100331	0	0.00878858	0.0327035	0.01299	0.00525421	0.00602667	0	0.0194141	0	0.020573	0.0571032	0.0105057	0.0871567	0	0	0	0	0.0141406	0	0.0890898	0.0537679	0	0.0109631	0	0	0.00647959	0.104531	0	0.00682761	0.0280052	0.00905367	0	0	0.0176658	0	0.00694778	0.0171308	0.0329834	0.0318046
S100A11	409.28	202.876	186.053	205.792	363.608	357.256	339.359	228.586	549.107	295.466	383.327	681.602	359.361	207.483	29.2822	432.726	306.788	173.062	200.227	279.535	381.414	418.059	224.568	413.892	348.817	161.032	595.473	559.654	778.47	342.339	378.518	219.575	301.499	284.948	292.08	529.503	386.427	252.706	241.148	308.432	336.409	520.616	456.869	222.227	334.788	342.682	173.399	253.644	446.595
S100A7A	0	0	0	0	0.00543237	0	0.0199983	0	10.1395	0	0.00833697	0	0.00666838	0	0	0.0245772	0	0	0	0.00349576	0.0549835	0	0	0	0.018137	0	0	0.0648746	0	0.00378453	0.00913623	0	0.00558855	0	0.00364489	0.00660607	0.00253741	0.00590792	0	0	0	0	0	0.0135079	0	0.0531255	0	0.00672544	0
S100A14	18.4795	49.9607	44.6334	8.28003	25.7668	33.1458	102.352	0.477258	132.446	18.279	1.00387	20.7182	28.5107	21.0084	0.0373926	61.161	6.00837	33.6084	36.0658	0.170813	16.1651	19.0466	42.9018	0.179148	11.3311	2.12953	0.259677	24.0515	8.40342	42.3211	27.2637	32.5152	13.8292	0.32398	16.9322	81.4359	29.2163	45.0339	5.41777	24.2902	16.6396	35.5368	54.3088	32.4519	0.478356	27.442	32.3683	35.9609	46.1551
S100A16	58.2893	57.4915	48.3285	44.593	67.1134	70.0589	74.4396	42.4033	165.142	57.5174	45.4261	94.6146	67.025	42.6044	14.829	63.5204	36.9497	61.9581	62.5192	49.7004	65.6785	59.1884	72.9527	49.639	42.949	29.1321	79.0344	73.3679	66.9667	56.5924	57.5254	44.7414	62.2485	43.5521	45.1353	82.3061	72.237	66.6417	40.7552	56.502	72.7506	82.1666	75.1711	52.7368	83.6172	61.536	60.361	52.6726	66.2418
AZU1	0.095561	0.966178	0.253236	0.01808	0.271588	0.521302	1.15977	0.0297231	0.532135	0.0383542	0.0208401	0.41436	0.133353	0.132421	0.0133904	0.49149	0.0543568	0.404063	0.100411	0	0.0080849	0.174031	0.0925501	0.0427691	0.62339	0	0.0273504	0.234243	0	0.227047	0.045676	0.684148	0.0628642	0	0.145779	0.586223	0.0634283	0.23629	0.0174002	0.865383	0.184587	0.21843	0.128654	0.360171	0.0137041	0.0619728	0.152803	0.210146	0.364745
TINAGL1	27.6286	32.0782	22.4378	21.6915	19.9162	21.6757	20.743	13.3369	23.3756	26.5635	15.8067	32.5888	30.6524	19.2918	4.21127	13.1637	19.2943	21.0173	23.3029	18.7994	13.531	21.3018	32.7534	24.9125	21.2348	16.482	29.9779	22.2446	12.6371	22.6265	23.4135	19.3578	27.3962	37.5183	20.1028	31.573	13.8255	24.4618	16.3318	25.8982	28.3757	22.339	27.0214	26.9427	41.1235	24.6032	35.3688	24.2907	22.4082
WFIKKN1	0.0756802	0.26692	0.259175	0.0726942	0.104234	0.0513007	0.0950163	0.0325931	0.0465121	0.0467306	0.0304698	0.0736814	0.158414	0.19966	0.0734168	0.168421	0.0132456	0.0964523	0.238563	0.00638812	0.0354622	0.146796	0.081189	0.0468987	0.0745726	0.0454246	0.00999708	0.0428101	0.0819843	0.155606	0.0959988	0.0974294	0.0280843	0.0318053	0.0599457	0.132791	0.0301395	0.253708	0.104942	0.0456535	0.0969882	0.0312418	0.137158	0.287983	0.00500911	0.181218	0.299209	0.144407	0.0987563
IL6	6.5195	0.503446	3.86269	1.72946	2.5511	4.7084	0.525576	20.7477	0.707804	14.6202	9.64417	1.50554	78.3102	1.69748	11.199	8.27247	0.983702	6.99971	0.519185	8.49441	0.257791	4.15314	0.414735	3.71335	1.87538	3.7873	15.7352	4.43323	7.3209	0.782647	8.3251	0.535979	2.07668	0.612386	1.39761	3.52921	12.0417	2.74898	0.472342	18.4287	121.282	32.172	0.471198	2.10479	31.414	3.18912	0.601971	0.405658	1.35044
UMODL1	0.0136564	0.101836	0.0289515	0.0797277	0.0232872	0.0294718	0.107772	0.00910215	0.243726	0.0532452	0.010211	0.0109743	0.0163347	0.028386	0	0.0244578	0.00221943	0.0868682	0.0307489	0.00642235	0.0178261	0.0426349	0.181387	0.0052389	0.0527582	0.011071	0.00402026	0.0132429	0.0160268	0.0301291	0.0783296	0.0565942	0.00855599	0	0.0133926	0.0525917	0.125866	0.0361797	0.0021314	0.00655688	0.00565263	0.0558386	0.0131326	0.0358461	0.00671461	0.0195202	0.0909123	0.0638385	0.0694998
MMP9	9.45167	0.428753	8.9621	0.234598	1.19195	0.933522	1.82386	0.187166	4.77683	7.06495	20.9252	55.9454	2.70364	0.511683	0.127757	9.7126	3.47815	0.686054	2.25132	0.780365	0.666465	76.062	36.4224	13.5311	2.84624	0.232826	18.3498	37.3054	0.556395	1.74742	63.4684	4.19108	2.24984	2.319	2.48964	2.29395	0.977941	4.37357	1.32811	1.89304	1.8844	3.24018	0.507356	3.19581	9.0374	1.25688	0.666458	0.4427	8.76441
TLR4	11.0867	4.9964	9.78178	8.98833	8.08912	5.49571	3.5748	12.9642	2.48014	14.1689	12.386	9.21263	13.2715	7.84721	2.67551	5.62709	22.699	5.97797	5.9141	12.64	10.3179	10.9536	5.55079	26.1663	10.0008	15.5294	15.7598	6.60762	4.71112	7.25284	9.14965	6.52247	9.84764	13.4848	7.84756	5.23212	12.4152	8.12593	13.1512	12.3085	11.4082	11.6689	3.52058	5.0438	7.01979	7.42116	3.3471	4.48831	3.92279
A2M	436.539	195.24	284.11	179.233	188.713	230.699	164.708	175.723	248.611	283.312	285.896	272.291	228.14	162.037	73.069	196.188	307.798	166.765	340.376	168.673	261.922	276.587	218.502	249.124	216.923	184.184	318.847	236.056	159.379	221.34	280.57	197.298	377.688	257.115	235.747	314.341	259.061	291.38	272.299	265.792	356.265	237.532	208.517	230.163	308.301	217.274	162.251	210.545	167.965
FABP6	0	0.0172091	0.0387904	0.041542	0	0.0460687	0.229723	0.0113824	0.0531598	0	0.159613	0	0.0383002	0.0760654	0.0615339	0.352902	0	0.0126314	0	0.0267708	0.0123844	0	0.0567068	0.0163783	0.0173618	0.0173056	0.008379	0.220807	0	0.0579645	0.0524745	0.01361	0.0106994	0.0111073	0	0.240302	0.0194317	0.0226217	0.0399802	0.0136658	0	0.0145473	0.0821128	0.0517224	0	0	0.234062	0.0643799	0.041386
NOD2	1.59356	1.36633	0.471397	0.667505	0.880515	0.398113	0.809591	0.11988	0.588597	0.325249	0.342678	0.840817	0.824864	0.726665	0.0581611	1.24846	0.475006	1.36873	0.334888	0.0948881	0.4214	1.07155	1.84915	0.689992	0.182857	0.273397	0.395421	0.531077	0.362435	0.892252	1.6084	0.669847	0.424744	0.251963	0.661457	0.732623	0.425057	0.755997	0.251026	0.772237	0.264864	0.441962	0.651942	0.866006	0.0595236	0.225231	1.16486	1.0901	1.01426
PLAU	15.0459	8.6644	17.6781	12.4138	14.5108	8.88279	8.36335	7.75184	16.8784	6.18948	6.07122	18.7967	20.1297	11.6603	6.56364	13.1867	9.53849	18.2018	15.1115	4.96995	11.1511	22.5582	25.4965	14.9801	5.59692	6.47332	32.9789	6.53982	4.76175	11.0183	16.6884	8.17878	10.9934	7.2007	11.7131	18.7639	15.672	13.1747	10.1487	10.7682	19.1684	8.98312	17.7875	7.53751	7.79417	8.63111	12.778	19.8904	25.5972
PAEP	0.00976532	0.0413301	0.134566	0.0110855	0.0333041	0.0245869	0	0	0	0.0156776	0.0383334	0.151062	1.70681	0.0202981	0	0.0282516	0.0222187	0.0505603	0.0769568	0	0.337086	0.147745	0.0453966	0	0.0277981	0.110832	0.0134156	0.0883834	0.0802222	0.255219	0	0.0108955	0.154177	0	0.0111728	0.121499	0.0544462	0.0543293	0.234712	0.0547008	0.0565885	0.0582292	0.0262942	0.165626	0.252075	0.0108565	0.0535367	0.0206157	0.0496974
MUC5AC	0.000813776	0.00344418	0.000862601	0.00277137	0	0	0.00715186	0	0.0319178	0	0.00106482	0.00228882	0.0017034	0.000845752	0	0.0149105	0.00092578	0.00168534	0.00128261	0	0.000826191	0.00136801	0	0	0.00115825	0	0	0.00368264	0.0439312	0.00290022	0.0011669	0.00181591	2.00002	0	0.000931068	0.00253123	0.000648169	0.0030183	0	0.000911679	0	0.00194097	0.00438236	0	0	0	0.00446139	0.00343595	0
OBP2A	0.0833587	0	0.677427	0	0.118454	0.0874493	0.0348855	0.0129639	0.464186	0.356872	0.018179	0.214916	0.0727029	0.0433171	0	0.200968	0.0790265	1.19407	0.175178	0	0.0423152	0.350328	2.80948	0	0.197741	0.0985507	0.0095432	0.22005	0.146741	0.478632	0.199218	0.124008	0.231534	0.0126505	0.0635823	0.288095	0.0885265	0.0257648	0.0303568	0.280162	0	0.331371	0.673358	0.431999	0	0.339802	0.818792	0.14665	0.0707045
PLTP	47.7036	28.9079	64.9648	19.531	42.8499	27.0687	43.314	40.9882	51.5772	49.0353	67.1577	218.709	96.3445	31.7144	11.0872	22.7617	116.078	50.8788	34.5418	46.0674	74.1079	55.685	51.5767	245.473	60.8343	44.5684	153.602	133.244	15.7059	37.3332	35.6482	35.8861	73.7149	86.9504	30.0227	189.238	50.8093	58.5181	94.9542	83.5852	84.6112	62.1611	28.0456	38.6044	54.3885	21.0596	38.9212	29.5388	21.3092
MX1	56.0403	5.238	3.66135	4.28773	4.78284	3.76953	12.234	3.41222	3.61482	7.28092	4.85821	12.2295	8.54443	7.63354	0.810525	5.09976	4.8594	5.82248	5.24152	4.09588	6.97513	7.70424	14.1766	5.18207	7.04366	4.59875	5.81612	7.51726	3.18336	34.8454	11.8956	4.14437	6.04781	6.4239	5.82613	16.8215	5.64282	4.04632	8.22067	6.38605	7.0166	6.98468	4.7945	5.38276	5.20395	3.49748	9.46377	17.1359	6.52207
RBP4	79.4602	17.9024	0.633603	28.3878	38.0642	23.5491	53.1474	426.531	11.8859	434.116	523.288	156.999	30.1722	182.824	0.288347	3.40189	115.256	43.1855	169.689	679.569	36.123	14.5948	12.0033	215.905	289.721	419.293	200.731	225.113	110.652	64.0366	10.3276	21.5819	162.952	655.088	199.114	16.0119	62.4156	82.4657	368.72	119.472	97.0151	16.6409	34.208	44.3746	490.426	12.2012	2.16229	15.7634	21.2774
FABP4	1054.49	164.197	59.2	303.973	259.777	106.083	271.65	2493.71	62.1883	871.492	2674.86	2209.89	322.396	963.582	37.8479	38.5668	2118.89	310.7	725.075	3829.79	343.243	532.522	49.2686	3395.23	1129.05	3557.14	3330.28	1467.27	724.352	415.807	84.7511	137.517	2223.38	3667.76	1134.93	203.192	464.101	326.24	3289.41	719.438	648.144	142.597	150.421	290.616	4265.12	127.481	109.598	136.445	138.584
OASL	7.65046	0.580949	0.483573	0.838682	1.12902	0.6048	2.30625	1.02843	0.469173	1.17962	0.839935	2.08363	1.72393	0.612589	0.125587	0.71636	0.574105	0.647983	0.699942	0.598062	0.516445	1.56774	1.67034	1.47983	1.49974	0.641485	1.35884	1.21951	0.426414	4.4747	2.28667	0.522512	1.23939	1.43	0.702099	1.54876	1.14797	0.621417	0.802742	1.23022	1.12295	1.1507	0.543528	0.804558	0.875388	0.498202	1.26159	1.64067	1.15742
CRABP2	106.852	99.8835	106.778	71.9022	137.238	147.937	478.204	19.7412	279.707	45.4868	20.42	211.421	187.418	91.7732	4.38434	125.673	30.4264	146.482	73.0981	22.7902	194.699	144.039	392.53	30.3643	163.621	20.9312	82.7777	121.003	117.809	144.786	208.487	151.32	76.1058	12.6468	99.3473	268.268	168.714	105.925	43.5191	86.6207	64.1782	246.222	296.783	117.983	11.0844	123.829	200.338	180.288	155.666
RBP7	78.3654	33.7113	30.8705	22.9325	22.2436	19.2448	66.2749	115.287	21.7519	76.2488	139.59	130.567	33.0693	50.4915	4.18716	11.5775	75.7559	47.6778	27.6034	123.523	40.3329	56.1934	22.8839	63.7692	50.0418	73.6967	135.672	92.2589	62.5309	60.1633	12.8403	23.8274	99.6038	83.0839	57.3019	40.4546	35.6485	32.9069	95.0558	52.2104	53.4436	22.361	28.4851	50.0192	239.69	22.5139	41.43	29.9753	27.5556
RBP2	0.168033	0.521526	0.178114	0.381498	0.08596	0.296148	0.210965	0.0313588	0.0732285	0.0269766	0.0439738	0.0945215	0.0175864	0.192099	0.0282546	0.129634	0.114696	0.365399	0.238357	0.0184386	0.153537	0.254226	0.195286	0.067684	0.263078	0.0476775	0.0115422	0.0760411	0	0.199617	0.0722844	0.412455	0.0589543	0.0306008	0.134576	0.0696882	0.21414	0.218132	0.0550733	0.112949	0.0730294	0.400782	0.203601	0.546238	0.0289165	0.392299	0.161212	0.230579	0.199534
CETP	0.967015	0.18254	1.49424	0.231918	0.32515	0.137168	1.20553	3.1264	0.395703	5.38995	1.67522	2.42293	1.06197	0.495428	0.664153	0.236419	0.627527	0.620556	1.3524	17.5758	0.947198	1.68285	0.854763	1.90186	3.86737	1.45885	11.8348	3.12028	0.679319	0.58248	4.36497	0.151962	6.30171	10.2439	0.599946	0.776681	3.29786	1.01033	6.35373	1.53348	2.72293	0.211155	0.0458414	0.702631	8.22685	0.105993	0.513349	0.158143	0.369675
C8G	0.110928	0.332551	0.426239	0.157405	0.30738	0.279291	0.243722	0.09057	0.382709	0.24487	0.181435	0.370494	0.304756	0.374682	0.501285	0.280805	0.0946466	0.215375	0.4808	0.106508	0.0703876	0.326334	0.386758	0.111705	0.236826	0.196716	0.171442	0.345118	0.113909	0.230613	0.357892	0.185649	0.182433	0.138884	0.126916	0.63257	0.176707	0.205716	0.136339	0.388354	0.160703	0.248043	0.485364	0.548742	0.190894	0.138738	0.285067	0.175636	0.352832
PI15	20.7862	90.5413	90.4365	12.3027	20.3583	23.6847	8.61183	0.301789	4.2111	4.00732	0.20251	8.20918	23.0591	12.5708	0.215197	8.94726	5.81021	27.5917	6.80816	0.039191	11.1681	33.4486	29.4337	0.0452898	4.92804	3.70166	0.188085	11.3856	68.1319	106.825	15.6798	13.5109	9.9671	0.337855	57.5373	60.1826	53.9924	55.4009	7.02563	52.6624	16.2783	14.0746	28.7299	40.1786	0.105851	10.6545	10.867	23.0616	17.688
APOD	484.322	313.107	499.234	429.662	1672.68	1326.46	850.845	313.075	776.456	436.44	263.395	398.045	436.832	837.894	21.8267	8717.26	575.038	626.324	587.682	469.957	725.047	1959.64	81.5695	302.851	248.324	483.469	543.398	1943	448.453	303.019	153.817	453.953	461.981	313.623	316.225	278.451	500.856	461.744	706.492	377.061	504.745	426.394	151.665	308.542	493.56	1141.26	183.064	306.097	279.524
ORM2	0.0186826	0.052714	0.237642	0.12725	0.127432	0.0235193	0.0234559	0.0697321	0.108558	0.0899811	0.024446	0.367825	0.156426	0.0582501	0	0.180166	0.0425079	0.0967299	0.265015	0.143506	0.284514	0.125626	0.130276	0.0501693	0	0.10602	0	0.359319	0.241179	0.62144	0.589371	0.250137	0.409674	0.221151	0.149627	0.232447	1.48806	0.103941	0.142877	0.0418605	0.0541314	0.0668409	0.301829	0.211245	0	0.0415404	0.025606	0.0986028	0.475394
ORM1	0.0157589	0.0444647	0.250566	0.053668	0.188107	0.0198387	0.118711	0.0588195	0	0.0252999	0.0618611	0.0221617	0.0824666	0.0163781	0	0	0.0537836	0.0652739	0.024838	0.0691704	0.0639973	0.105967	0.256408	0.0211591	0.134578	0.0223571	0.0432992	0.231773	0	0.0748842	0.158181	0	0.27645	0.301338	0.0180303	0.0163392	0.502076	0	0.120517	0	0	0	0.0212163	0.20046	0	0.0350396	0.151192	0	0.240599
CTSG	1.81877	1.15173	2.3989	1.23175	3.98248	0.32523	1.89423	2.78674	1.45613	5.39188	6.3282	12.1637	5.63487	14.9822	0.938325	1.48486	4.76126	2.04386	3.09463	5.09148	12.7472	4.82939	1.99365	6.96528	5.47148	2.47765	23.4033	5.4364	2.00105	3.70745	5.29007	3.25142	4.0426	3.75444	0.484757	15.6324	5.55586	5.6726	10.0593	8.85651	3.15885	6.07568	0.48694	0.78871	5.01493	0.930578	0.113308	0.872642	0.701213
ISG20	1.99589	1.67857	1.46561	1.51047	1.72638	1.64108	1.62213	0.39947	3.2243	1.26623	0.519797	1.73832	2.47036	1.27265	0.0567452	2.18137	0.476056	2.6778	1.37077	0.383009	1.35676	1.31291	3.57689	0.616232	1.01005	0.481502	0.46759	1.41154	0.497885	1.80062	6.04471	2.48506	1.31256	0.57243	0.867091	2.65721	1.00912	1.25883	0.469815	1.06507	0.743121	1.65812	2.35476	1.90244	0.919237	1.73654	4.30549	1.52258	1.82212
TFRC	13.3184	7.12666	12.11	11.0848	10.6831	15.4134	14.5831	6.23398	10.8138	9.14178	14.3812	8.89899	11.6461	7.93123	11.264	17.8818	7.22554	10.941	11.1427	10.5273	7.406	12.6896	14.1186	16.4175	13.05	4.72754	10.024	9.67446	7.27422	9.16419	13.8987	8.59088	8.11008	6.79801	10.0784	8.95767	24.0194	14.5663	5.00163	10.3142	11.619	12.2054	6.07869	9.16775	3.87568	12.0927	5.18653	9.42737	10.3774
LRP1	44.6983	25.3182	41.2151	16.3225	29.9575	30.7092	25.4981	108.146	19.0315	140.163	158.941	83.2943	48.2361	73.3869	7.02082	18.1344	102.719	30.0734	54.8206	91.2303	40.7634	39.5175	45.2978	188.286	78.4336	65.365	49.3798	81.9549	7.56601	32.7818	29.0458	30.4403	86.8846	129.774	45.952	31.6523	40.0505	62.5583	122.326	71.3917	53.2761	46.3073	17.4372	26.2143	67.2847	23.6428	16.4732	31.5813	17.4267
IDO1	4.19737	0.257993	0.493843	0.232309	1.17311	0.24666	0.563058	0.999471	0.328903	6.01162	0.928662	2.12474	0.555958	0.230785	0.453928	0.424088	0.772729	0.464398	2.53231	1.06546	0.530465	0.94422	0.48579	0.800924	1.64227	1.32191	1.60608	1.96055	0.710273	1.80522	6.98025	0.218611	2.64664	2.17661	1.98271	1.44463	1.10284	0.759022	0.589858	1.8585	3.22332	0.565992	0.592059	1.39081	1.88822	0.237192	0.805636	1.13062	0.583516
GDF15	0.544275	1.32455	3.23081	0.82638	2.77273	1.05347	2.50272	0.266632	5.91997	0.425977	0.471818	5.9128	3.959	1.01112	0.188759	6.69212	0.518568	5.791	0.428923	0.104518	0.683815	5.37539	2.54602	0.675976	0.89087	0.443993	2.48152	2.22444	1.02199	1.13152	1.14141	0.622446	1.73056	0.631884	0.599371	1.87636	2.28136	2.92714	0.527731	4.67987	8.31865	1.68762	0.522091	0.750037	1.93181	0.786621	0.913817	0.718142	2.3775
ADIPOQ	124.674	23.1014	0.101142	90.7802	50.5656	43.0069	52.9424	639.127	6.65774	302.643	592.432	119.122	28.0651	202.413	0.892795	1.98874	381.818	87.3571	175.491	692.647	71.8488	18.7723	14.5593	435.05	290.35	868.448	265.769	167.748	92.0798	89.3807	14.0177	32.6559	370.475	785.111	311.016	10.0527	179.757	86.1871	756.385	113.108	116.713	8.42064	24.0388	49.1897	534.046	12.3737	1.75495	26.1772	18.6668
STAT1	142.635	19.1709	22.3534	24.1708	24.0201	24.0051	23.3397	19.9973	19.0619	24.8062	28.7478	19.7994	24.1578	22.5093	11.2947	22.5963	31.6149	21.531	23.1739	25.8279	22.5197	27.8833	42.3379	26.7682	26.4292	23.7911	21.7073	23.7651	25.4533	63.9232	55.1973	22.7934	41.4073	40.1428	26.3956	30.1899	33.7017	25.2963	30.0175	28.5973	24.1484	23.2357	20.0917	26.7058	16.7283	20.1066	23.9038	40.7288	23.6927
SOCS3	39.9944	14.3678	89.0708	23.5112	37.6022	34.9451	5.92044	294.489	16.7784	87.2371	106.554	50.5181	708.096	46.8069	113.669	67.1007	8.28329	153.139	13.4651	48.5427	4.99318	35.3059	5.5408	114.56	45.5705	86.2852	231.782	49.6893	78.7515	24.0059	84.4639	5.47575	18.3122	8.35598	17.8021	35.1671	68.2692	28.8453	7.01289	57.6643	607.746	237.155	16.2142	31.8714	340.929	33.9149	9.24627	9.90039	36.685
CCL20	0.285456	0.253561	0.168101	0.420059	0.10817	0.173023	0.252199	0.0591918	0.41467	0.186707	0.152173	0.118944	1.28356	0.318648	0.00888874	0.0815642	0.0240551	0.065687	0.0833174	0	0.0429349	0.0177729	0.122872	0.0283907	0.150478	0.0149991	0.123458	0.310987	0.14889	0.841499	0.864129	0.129756	0.0463667	0.0673878	0.0846738	0.120579	2.19785	0.215672	0.0115505	0.0710662	0.0459492	0.277384	0.327375	0.194257	0.109164	0.1528	0.0579615	0.256676	0.286959
RARRES3	78.6234	55.1132	36.5317	25.3252	58.0046	52.1103	53.905	5.80349	61.0841	22.6022	9.62558	41.5186	46.183	30.8652	4.23651	30.2945	12.7334	32.3035	31.8716	5.51739	39.1845	49.2999	34.3245	8.92311	27.1167	9.45935	16.9911	60.2233	28.7599	107.374	50.3595	47.4529	34.2272	11.7643	25.3121	92.4777	37.9065	34.1358	16.5632	38.9286	30.2769	67.9407	61.6741	53.0365	14.6531	55.5586	34.3669	51.251	66.141
IKBKE	2.41203	2.99598	2.80686	1.86651	2.73352	2.64984	2.76026	0.478799	4.62467	2.29094	1.2399	3.79233	2.79491	1.96574	0.0818721	2.40189	1.22714	3.17639	2.60922	1.06035	1.45637	3.02219	7.02551	1.51368	1.00753	0.515417	1.44329	2.56358	1.1736	2.92325	9.38788	3.94066	1.65573	1.0811	1.99691	3.46003	2.58941	2.76444	0.896122	2.37073	1.43789	2.42985	2.50609	3.11797	0.92169	1.88208	4.25042	2.90976	3.86301
ISG15	67.4216	6.31561	5.40034	0.923978	5.83454	5.23716	15.8395	5.66814	13.3784	13.0915	9.34864	33.9154	20.3819	5.07555	3.05409	7.35505	5.84732	4.47956	8.19615	5.73936	3.53498	16.6728	21.5468	12.4667	11.542	2.99377	18.7608	21.5717	1.66279	46.789	15.7564	2.47216	9.90246	13.0798	3.69054	46.7279	4.05789	7.88271	10.1439	11.1619	10.154	13.6794	6.08786	6.81726	26.5096	2.81522	17.6633	18.7266	8.23344
TFR2	0.103722	0.253111	0.0445725	0.0572812	0.152969	0.0846973	0.0598323	0.0104633	0.25248	0.0495059	0.0586897	0.110384	0.0997544	0.0553558	0.00707063	0.118948	0.0478372	0.124823	0.0618572	0.0215329	0.0483833	0.0942508	0.110771	0.0376394	0.0837893	0.0437476	0.0462144	0.101488	0	0.0865862	0.253245	0.100088	0.0688479	0.0229733	0.0737693	0.136607	0.0424237	0.119571	0.0490024	0.0628114	0.0731014	0.0768924	0.0264188	0.126789	0.0192967	0.084147	0.169055	0.115403	0.0998657
LYZ	48.9471	5.17817	47.3789	9.25613	48.8634	5.38063	16.6037	4.33375	11.0029	27.3956	55.147	174.185	25.7026	13.6775	4.29726	55.5078	37.434	18.8538	54.1969	5.81182	31.4131	235.808	37.9426	95.9485	26.453	4.88749	130.816	53.7186	3.08894	32.8747	207.837	49.5557	20.8415	31.7357	11.438	28.3667	31.1133	17.3156	15.7849	14.1576	21.7477	16.8371	7.21722	25.3357	7.84008	16.9397	8.2189	9.02317	305.794
LEP	114.898	15.3164	0.145226	4.13797	24.9271	12.7945	6.34874	136.431	1.4595	354.066	437.072	152.507	38.8458	28.4778	0.108206	2.01385	444.279	1.23384	35.7803	522.429	2.0485	10.1478	4.30395	181.897	254.328	60.6787	156.706	219.269	14.6316	39.3776	8.11427	11.2237	71.7094	356.435	127.017	14.6441	33.3325	32.314	184.823	150.051	35.3899	5.56018	7.84757	20.5788	199.534	5.02177	0.910437	3.63297	8.22609
CST4	0	0	0.0200408	0	0	0.0476023	0.23737	0	0.0823942	0	0	0	0	0	0	0.0729299	0	0	0.029799	0.041493	0	0	0	0	0	0	0.0389607	0.278066	0.0221882	0	0	0	0	0	0	0	0.0752947	0	0	0.0423621	0.0273901	0	0	0.0267221	0	0.0210191	0.0518258	0.0199569	0
CSRP1	76.6593	93.8238	102.367	86.2511	105.181	110.78	102.785	16.5145	115.742	71.1074	12.3398	75.2126	77.2549	68.1499	2.87737	88.13	42.0201	112.032	92.7522	15.3118	74.9913	62.393	75.2315	22.7209	49.7434	25.9792	19.5422	55.3121	88.9964	77.9202	41.2451	84.1985	64.3622	15.1993	71.4789	115.26	49.8888	83.7263	25.1523	88.4812	96.7672	109.093	196.72	106.713	30.0611	123.332	98.6326	132.739	101.223
JUN	89.2156	120.748	239.386	131.669	185.954	145.31	88.3822	232.192	141.469	192.446	182.042	155.776	396.384	167.397	141.305	236.073	44.3934	163.668	79.6859	135.912	24.1682	199.171	104.995	111.758	110.974	170.647	100.055	131.405	191.774	146.32	260.103	75.9387	53.8798	38.2533	108.219	117.174	103.796	209.188	19.8067	198.959	353.878	95.2364	235.887	318.78	343.366	157.109	118.391	149.051	380.596
BST2	172.682	74.8982	78.3468	17.4723	57.5334	42.2506	97.8148	66.9085	106.688	79.9767	80.8574	178.549	103.08	61.5455	11.1055	75.5968	57.6543	55.6846	92.6361	68.6578	41.5972	79.6274	69.31	89.018	68.9894	47.7042	131.471	115.661	18.3013	149.081	68.0671	41.7499	107.401	91.8421	45.9049	239.782	38.88	83.4893	61.578	84.8372	88.4562	83.0006	122.417	69.3334	187.549	40.3027	62.886	83.8048	100.91
PLA2G2A	37.8859	0.17832	4.14451	2.21925	1.3076	0.233378	0.655931	8.79079	1.43219	15.6658	33.0011	30.4314	44.2728	6.20044	0.892661	9.35322	33.5427	0.287951	3.93127	13.5094	12.4734	15.228	0.313385	141.008	26.5418	38.8051	69.4355	34.2724	11.6693	3.30346	12.9652	0.10342	31.065	34.014	4.52168	91.8682	16.2759	4.95378	40.8292	4.51248	83.0366	7.69775	0.0794131	1.88177	11.2964	0.187363	0.461972	0.791632	0.671853
PDGFRA	11.7944	7.50043	18.6324	14.6111	22.5775	12.3811	10.0911	9.60872	7.8545	14.4988	14.7112	10.8086	14.3734	27.7969	3.3487	9.15372	19.129	13.6242	18.0766	8.86776	23.842	17.2175	7.54207	21.6873	11.4357	19.1668	15.7241	9.93498	19.2744	11.3127	11.2114	16.8024	14.7934	10.5336	14.4658	8.68897	15.251	15.8742	18.1471	15.0783	16.554	13.5019	8.05137	12.7685	5.86256	14.7781	5.98295	13.2736	9.66733
GNAI1	19.5854	6.4451	7.34162	12.0666	7.85947	8.25921	7.57441	39.1733	3.22069	23.4319	29.6315	12.5638	9.45488	16.7948	2.63062	7.73615	31.4606	7.09441	14.9965	39.8544	8.41399	11.0657	5.85742	24.6365	16.1202	50.4148	22.0159	12.598	15.6372	10.2868	5.40458	7.85655	18.9893	40.9986	23.4801	4.68165	15.1818	9.85626	36.2887	14.5356	13.0106	5.08326	7.54209	7.23818	31.9523	9.62327	4.87477	8.89303	6.74871
TPM2	43.5471	55.4958	79.8574	27.8436	47.1139	45.5104	70.1872	17.3512	93.1764	59.0073	23.5646	120.724	69.1359	43.982	2023.27	52.7505	46.164	58.4521	72.9766	18.2255	32.7668	44.5472	79.1934	32.1272	49.9812	13.0509	27.0037	58.0626	16.9021	59.4724	33.3147	52.7989	66.428	17.7592	35.1439	135.016	19.458	67.3418	23.4429	60.621	76.9733	94.5313	153.229	75.8499	43.8093	70.8605	74.9764	119.523	64.7905
AHNAK	179.574	199.991	221.765	133.542	162.342	200.344	122.338	212.311	69.8593	289.46	399.989	127.104	184.874	243.832	77.6841	147.35	410.001	157.019	255.404	269.083	195.717	140.4	109.141	429.861	331.467	187.239	152.437	184.044	54.2094	190.07	142.675	238.286	221.347	429.19	271.216	104.131	192.752	263.047	278.547	257.539	190.816	213.296	153.489	204.187	167.239	243.596	107.865	220.677	153.873
TK2	9.35824	6.28407	7.20307	6.78546	7.60574	8.11577	6.44032	16.827	6.4361	13.3006	22.1268	11.6202	8.12569	9.6642	1.68348	6.77468	15.4928	6.63263	10.6979	20.2555	7.93459	7.61118	6.55095	17.3597	12.4458	13.8272	13.0686	14.3473	4.77655	8.45383	6.49228	6.76418	11.4118	15.5258	11.8673	7.34131	8.13371	8.16871	15.7698	11.7355	7.99097	6.79542	5.56491	8.00604	17.3383	6.7466	7.06596	6.41819	6.90782
FGF2	11.424	5.16823	6.40903	9.39024	12.5617	9.41882	2.64964	26.5549	2.4873	15.309	13.0231	3.92575	7.97969	10.5921	0.678371	6.71998	18.4013	5.01962	9.08375	23.9056	8.44709	9.96333	4.10654	19.7791	10.127	29.8336	11.9096	6.45155	15.3548	6.34125	5.13886	4.69999	8.35665	20.7777	19.3696	3.08339	11.0238	6.04364	15.9909	15.0805	9.34528	4.41884	5.44838	10.1956	13.4344	9.76479	2.5823	6.41537	7.93171
TCF7L2	18.5174	14.8033	18.7805	28.2094	13.3105	13.9375	8.9837	12.833	11.7445	18.4671	10.4584	10.0263	17.3448	16.3834	2.02467	9.03129	13.7963	17.4588	13.7948	11.7226	17.9995	11.9853	19.8823	12.6748	12.449	14.8252	9.17804	9.25411	18.122	11.9253	14.448	20.8819	11.1115	10.364	20.6827	8.94336	16.0759	12.6989	13.136	11.894	13.0589	11.7313	15.9279	15.2739	8.79838	14.1892	21.9725	13.293	12.7388
ROBO3	1.34995	4.92943	2.78906	1.40628	2.64313	2.71453	1.07071	1.30303	2.43367	2.01153	1.17672	3.81676	1.544	2.18431	0.185197	1.25701	1.57714	3.77514	2.63414	1.2751	1.44441	2.63286	1.09917	2.97389	1.21094	1.01493	1.70187	1.86792	0.635606	2.38154	1.57641	1.65951	2.081	1.85118	1.41273	1.88368	1.27483	1.94882	1.5477	2.37722	1.05689	2.14254	2.77243	3.48753	2.45179	2.5253	1.20486	2.46168	2.00894
SLC11A1	0.240574	0.113132	0.222048	0.0687386	0.226046	0.0947711	0.113008	0.0824632	0.118868	0.388853	0.747355	2.13578	0.347704	0.134368	0.0894355	0.202012	0.355605	0.157604	0.105756	0.253212	0.106338	0.825346	0.342358	1.79525	0.603294	0.106802	0.848736	0.718385	0.0384124	0.198306	0.600759	0.151555	0.27848	0.32486	0.134816	1.20474	0.265916	0.11533	0.214555	0.297018	0.194414	0.44499	0.141012	0.152663	0.250653	0.12736	0.0829923	0.089829	0.241533
DES	21.8571	1.60153	2.80367	0.516779	0.756627	2.35765	5.71548	29.9987	2.03414	2.10005	3.00852	43.0148	19.9084	2.33568	3837.17	0.727975	45.745	0.280454	8.4648	3.54737	3.39323	2.34428	0.34825	40.2951	39.3603	6.205	7.1882	4.042	5.88355	46.4477	2.70201	0.237887	21.7593	15.6731	3.44816	24.8129	0.66552	1.01522	3.45628	18.7862	57.7862	2.50147	1.19474	8.31564	7.5366	1.26847	0.489674	7.29309	1.34901
TMPRSS6	0.118265	1.0207	0.545688	0.0750239	0.136423	0.770686	0.432343	0.0194744	0.924684	0.0781805	0.00910286	0.156532	0.764503	0.274745	0.00292444	0.73461	0.059357	0.407015	0.197365	0.00763382	0.236607	0.719228	0.226383	0.0326924	0.272294	0.0197391	0.0119465	0.95233	0.224518	0.413221	0.384059	0.28719	0.277639	0.00633456	0.183068	2.7842	0.116362	0.793432	0.0380018	1.02877	0.226763	1.88329	0.641566	0.57029	0.0299295	0.204954	0.352789	0.374507	0.182922
SPINK5	0.307894	2.81655	2.05783	1.59306	0.32607	0.432484	0.594082	0.32964	1.04519	0.359021	0.0593712	0.797613	0.590213	0.24252	0.073571	0.24066	0.516189	1.70824	0.189004	0.73262	0.276396	0.108966	1.46146	0.731068	0.249097	0.528768	0.155837	1.177	0.266248	0.542876	0.664573	4.0934	4.2556	0.885334	0.140909	0.709031	0.392378	0.558968	0.276184	0.395768	0.652641	0.459948	0.615233	1.80024	0.340219	0.684597	33.644	0.988684	0.500316
MARCO	4.01581	0.58774	2.41071	0.372139	0.989911	2.28699	1.9207	0.822094	1.52785	7.00632	20.2054	83.4723	11.2722	1.21375	0.855555	2.48298	23.2467	0.622347	0.57051	4.66145	3.29356	4.85647	1.38109	110.48	1.18592	1.34679	39.3691	45.9503	0.288542	3.08308	5.35689	2.33173	4.30711	5.29218	1.41433	9.72945	1.77336	1.16523	17.6911	8.02618	2.88909	17.4706	1.68264	0.530907	9.77848	1.03262	0.187211	0.418125	2.2708
KCNH2	0.149791	0.344251	0.148535	0.183754	0.193631	0.279814	0.360959	0.110465	0.487837	0.112483	0.0126452	0.285398	0.222515	0.158188	0.0264061	0.239976	0.096198	0.307719	0.118045	0.00795335	0.169246	0.479248	0.336941	0.0454145	0.488294	0.0685512	0.0199145	0.166732	0.141767	0.275531	0.24597	0.180605	0.0932415	0.0483979	0.165853	0.363219	0.294422	0.183698	0.0765454	0.159692	0.192504	0.429305	0.224433	0.242445	0.0249458	0.212191	0.281461	0.260122	0.209021
CCL28	39.7653	64.3491	30.2743	97.5683	66.7652	42.1579	53.1328	1.34424	43.7505	33.8754	1.68788	20.4841	64.1687	36.8134	0.047497	15.215	9.69395	75.4842	32.0945	0.816226	72.1534	58.6279	103.424	0.686889	19.3917	12.8859	0.875283	15.84	92.9115	44.8872	60.8103	82.8764	18.7582	0.7116	81.3593	25.4277	52.9415	30.9123	6.39489	28.8006	14.659	44.6944	55.5053	57.9292	1.04781	32.5058	90.5709	59.1455	67.3404
IRF7	9.7522	5.44993	4.60454	2.06692	4.65262	3.42801	10.5345	1.56791	8.79824	3.71246	1.93	10.3333	6.22014	3.64987	1.99868	5.01228	1.69643	3.02115	5.05828	1.42289	1.88146	6.23973	6.995	3.57638	3.62197	1.38738	3.84485	5.29955	1.59151	9.66617	11.6056	2.63431	3.50212	1.89406	2.57155	11.0356	2.1732	5.77131	2.21352	5.15706	4.19539	5.47682	4.85898	5.91052	4.64887	4.0004	6.6942	8.06982	8.26718
IL18	3.06884	2.13424	1.79829	2.34905	1.91633	0.850202	1.33631	0.357947	1.44413	1.71745	1.43513	6.82305	2.1827	1.05565	1.31731	1.15147	2.34796	1.7008	1.05594	0.403151	2.33125	3.58762	1.79584	2.14728	1.05352	0.689855	3.01353	2.06603	2.17485	2.39408	7.67765	2.61622	1.08997	0.934733	2.10793	3.82045	2.44432	1.37269	1.15693	1.28926	1.33845	1.87501	1.38204	1.68763	1.01345	0.894984	1.94013	1.70521	2.56631
APOBEC3A	0.566024	0.0169901	0.121273	0.095698	0.215629	0.0758043	0.0378001	0.191039	0.279912	0.0773374	0.638208	0.364126	0.189065	0.0563232	0.106314	0.0522618	0.157557	0.0685888	0.0759255	0.132151	0.0611339	0.232819	0.139963	0.541692	0.248544	0.0512564	0.388802	0.19756	0.00706671	0.236061	0.146786	0.0537473	0.200702	0.427671	0.0688943	0.212271	0.215826	0.111669	0.118415	0.242855	0.244257	0.315968	0.0405341	0.144682	0.134711	0.0401663	0.024759	0.0572047	0.163438
MASP2	0.688061	1.71993	1.07277	1.92995	1.13912	0.912444	0.561927	0.308553	0.21349	0.557681	0.393344	0.263041	0.503389	0.982391	0.182532	0.415513	0.668767	1.19325	1.3319	0.282218	1.15296	0.808548	0.628857	0.565069	0.689328	0.459644	0.0757126	0.336313	0.290069	1.14673	0.680107	1.21862	0.515625	0.377129	1.17321	0.304753	0.830037	1.38131	0.529119	0.84942	0.203232	0.370448	0.723984	0.977214	0.0747231	0.582993	0.819441	0.997765	0.730929
PTX3	7.42142	1.95151	5.10481	2.46759	13.6287	5.36239	7.04791	0.71709	6.06022	4.62954	0.718258	3.95236	3.27084	2.28196	0.190755	2.55501	2.02329	3.38016	1.28045	0.730844	9.72667	19.1444	2.02443	0.864774	7.69824	2.28435	1.78975	7.74203	29.6761	6.15583	17.8833	9.36639	6.75988	1.31288	9.37872	13.3026	11.0294	4.00403	1.58322	10.7823	7.30551	17.1774	19.6283	4.08607	1.08318	5.86662	1.53478	2.64988	1.91203
PTGS2	2.70017	1.25837	5.43012	5.34421	12.1727	2.75125	0.612374	8.9266	1.26833	1.20703	3.10296	0.65182	25.2704	6.61796	2.51937	5.35854	0.570215	8.46068	1.5715	1.49035	0.538969	5.43157	2.91888	1.00224	2.89963	4.31625	5.61792	1.42375	24.5886	2.38497	12.4464	2.13171	0.510549	0.338618	3.73373	0.726442	16.8619	4.96248	0.320904	3.59258	36.2716	1.65185	1.53827	3.69829	1.97553	1.08751	1.47367	1.7323	3.83997
PROC	0.0170727	0.128458	0.530845	0.0710626	0.106747	0.0931344	0.0357245	0.0106205	0.0413347	0.0456818	0.0446788	0.0480184	0.101254	0.0414015	0.0334922	0.0658562	0.0517932	0.0471437	0.0896956	0.0624474	0.0866656	0.0669672	0.132278	0.0611281	0.0323995	0.0161473	0.00781816	0.0708218	0.00667868	0.128451	0.334575	0.13334	0.0499162	0.0310914	0.0195334	0.0354027	0.0407949	0.116091	0.0124347	0.0828821	0.0577112	0.0271472	0.022985	0.080434	0	0.0759216	0.0779983	0.090106	0.135156
PPP4C	16.0061	21.907	17.7371	11.7084	21.0682	21.6274	28.7154	11.7662	40.2034	17.4424	12.8503	31.0324	20.1002	14.1738	7.88561	28.3217	10.8888	17.9565	17.1158	13.8539	14.5103	20.211	21.8976	15.5918	19.093	9.93189	19.5919	27.8206	9.49577	19.4897	20.4941	16.3056	17.3647	13.274	12.8465	28.3286	13.9939	20.1099	11.5747	19.5434	17.5755	25.8889	26.3315	19.3343	22.5666	19.1226	23.4324	18.3316	24.8531
RNASE7	1.25033	2.21828	1.87757	2.96774	1.87365	1.14474	2.68765	0.0353545	1.85758	0.927624	0.173519	0.932446	2.1909	1.56525	0.0318548	1.3245	0.732758	3.23681	1.01519	0.031182	2.50995	1.81526	0.704541	0.165334	0.552753	0.631592	0	0.492948	1.45623	1.67664	0.66554	2.34618	1.22962	0.0689998	4.97437	3.08379	2.30108	1.56339	0.921012	1.68727	2.95032	2.41739	5.22849	1.27184	0.032601	3.07493	1.97332	4.11935	2.50668
HGF	2.29013	0.837547	2.13825	1.42215	1.42328	0.968369	0.68525	0.869672	0.867048	0.930051	1.26338	1.15358	2.04275	1.69842	0.248224	0.886471	2.15325	0.991544	0.913071	0.588411	1.75311	3.29986	4.94104	1.72066	1.54005	1.41959	2.33716	0.902758	1.13311	1.96413	1.98177	1.20191	2.1641	0.81668	1.29093	1.70431	4.1477	1.72545	1.22571	2.1723	1.96752	1.25994	0.588709	0.800747	1.42537	1.10535	0.664945	1.22131	0.536041
BACH2	2.0342	2.4727	2.6807	2.38332	1.92489	2.17725	1.24236	0.376379	0.748236	1.22991	0.495515	0.814132	1.47299	1.85476	1.1979	0.936067	1.32875	2.76751	2.017	0.253149	2.8106	0.968322	2.28319	0.804575	0.584427	0.948935	0.447493	1.0719	2.85554	2.15629	4.1361	2.7747	1.59208	0.420128	2.4934	0.955267	2.28242	2.39476	0.792577	1.39792	1.8119	1.12645	3.03557	2.69669	0.3995	2.00503	2.80991	2.80272	1.62695
RSAD2	20.1585	1.16028	1.15511	1.45711	1.4976	1.46798	2.35277	3.47261	0.499223	2.42853	2.69037	3.22192	3.28627	2.68636	1.16807	1.06221	2.95058	1.29571	2.65271	2.18206	2.74351	3.78231	3.10644	2.38994	4.58197	3.07532	2.34043	2.38264	2.23372	11.7871	4.06023	1.35021	2.90097	4.05731	2.44318	3.35607	2.78871	1.30732	4.41559	2.82995	2.01699	1.59032	0.905572	1.98026	2.34538	0.757593	2.50806	4.66309	1.38521
PDCD1	0.732103	0.483254	0.249183	0.312606	0.458128	0.143741	0.312006	0.0564058	0.234165	0.248008	0.17577	0.462827	0.323359	0.0977264	0.0338815	0.0906794	0.129896	0.201696	0.095275	0.0442212	0.0613711	0.293564	0.187342	0.189381	0.0955969	0.0667012	0.23068	0.70668	0.0236471	0.678217	6.1061	0.322236	0.42417	0.0183475	0.0691615	0.612821	0.219338	0.411042	0.124744	0.18059	0.204337	0.368458	0.28936	0.294284	0.0809088	0.209078	0.138084	0.290678	0.546906
PCSK1	0.101668	0.0868138	0.0907521	0.109338	0.109495	0.0774669	0.0705402	0.0873786	0.0505254	0.120269	0.16804	0.0413877	0.0532031	0.0556122	0.011247	0.0619224	0.146098	0.0554096	0.181326	0.0499097	0.127666	2.50519	0.0435318	0.132915	0.102817	0.106279	0.14151	0.0605377	0.106756	0.092173	0.24937	0.0447768	0.0422411	0.0633408	0.0795887	0.499321	0.0852403	0.0793868	0.151996	0.0899207	0.11628	0.0510512	0.100856	0.253359	0.368335	0.16062	0.0220018	0.0536584	0.0953118
BIRC5	0.736922	0.320291	0.276159	0.692896	0.691773	3.27038	5.20076	0.13197	2.20587	0.585565	0.399338	3.16133	0.56871	0.251425	0.0938734	6.89116	0.169363	0.169575	0.205312	0.0204202	0.717935	5.34941	7.56093	0.529704	0.715135	0.116163	0.733723	3.18747	0.283909	0.667632	5.11271	1.06721	0.470089	0.345673	0.668547	1.70563	1.82608	0.331302	0.341556	0.258514	0.258809	0.932094	1.99426	0.473433	0.121692	1.90748	1.71396	0.428218	0.555603
VIM	403.769	176.042	249.723	247.722	246.739	237.45	251.309	784.159	239.577	460.895	909.919	871.72	437.577	402.19	58.0337	147.726	746.946	174.887	251.29	809.533	559.799	389.548	209.041	892.038	459.906	813.382	1218.31	674.671	555.715	303.384	345.379	249.749	579.152	790.935	488.032	375.115	375.253	280.229	673.91	388.329	570.883	450.658	260.603	215.452	1057.18	244.926	139.465	243.742	192.14
GFAP	0.212305	0.849176	1.26123	0.950783	1.33274	1.16599	1.04569	0.568191	2.91462	1.82032	0.25643	0.252631	0.354053	0.982001	0.00980741	0.616459	0.201714	1.11613	2.8314	0.371211	0.383715	0.251005	0.244027	0.11277	0.438319	0.284647	0.0657048	0.319373	0.930911	1.23057	0.976856	2.27765	1.10094	0.18057	0.333661	0.732937	0.650385	1.18116	0.331351	0.807634	0.567819	1.30768	0.892032	1.76414	0.923418	1.69888	0.6651	0.916102	3.75191
SLC29A3	4.95687	4.67945	5.73652	3.63322	4.1045	4.81497	4.84185	1.58456	4.36497	2.9131	3.62719	16.8431	4.89443	3.64519	0.378053	6.22391	4.1526	3.03481	4.35241	1.60218	4.89285	9.74681	4.56194	6.33584	4.25417	2.13896	6.87154	5.91316	2.48956	4.85165	6.94853	5.76664	3.90234	2.62527	3.58316	6.98236	3.94392	4.37552	2.83198	5.18577	5.05052	4.27111	4.8217	4.14226	3.65971	3.62875	2.4652	4.36674	6.91908
OAS1	41.1842	4.11398	3.28273	3.52862	4.67894	4.68636	7.90608	3.21117	4.61969	4.24847	3.94338	12.557	5.21784	4.54304	0.460901	5.07072	4.79007	4.43436	6.1116	2.2771	3.87849	8.61735	10.354	9.53795	3.57858	3.42855	7.15862	6.36118	3.60752	16.8063	6.82785	2.71559	5.98662	4.58664	4.67294	9.82335	8.24133	3.22558	4.52796	5.52741	3.38466	3.71041	3.01789	3.63477	2.24736	2.31659	8.7016	11.7883	6.71914
TNFSF4	0.518677	0.274402	0.553614	0.39253	0.350098	0.299271	0.434131	0.584815	0.19883	0.404786	0.6127	0.62304	1.0857	0.482905	0.115076	0.288302	0.602357	0.317035	0.23276	0.596822	0.720403	0.653945	2.34423	1.70718	1.23552	0.802276	0.893173	0.513451	0.422712	0.312364	1.33255	0.462159	0.938322	0.852739	0.379139	0.522838	0.74018	0.293909	0.637493	0.379314	0.641832	0.618559	0.276409	0.300363	0.285131	0.264291	0.28633	0.338381	0.256631
ACO1	20.9664	7.41597	5.66566	8.58291	4.65974	8.88646	9.82523	74.2212	7.16928	44.7667	65.1013	18.9607	10.5784	29.5602	5.53505	9.10363	49.9771	10.5889	20.0538	85.48	11.7059	8.79567	6.6662	43.6701	38.2436	51.6219	32.239	30.0096	13.3461	11.3887	6.51092	7.76479	32.4466	70.2042	31.7057	9.9125	16.6263	13.8263	58.2282	22.4487	15.1872	7.95214	7.115	9.03937	52.1937	7.20214	4.94049	8.05226	7.72813
CCL14	7.71833	4.59575	2.75323	4.60029	2.53305	4.24858	3.78997	3.74087	2.88348	3.16581	4.9218	6.65182	5.87782	4.39676	0.423603	0.800026	6.31	0.913031	3.97743	4.79954	5.48569	7.71052	0.625943	7.41812	6.2748	6.44551	12.1489	8.55026	6.64697	5.57784	3.40684	4.28398	9.58154	5.20871	2.98667	5.08434	6.77725	5.11489	6.54374	4.92927	11.8864	2.36203	1.85954	2.52926	14.0223	2.04258	1.63709	3.54862	1.42206
CCL17	1.00765	0.258469	0.631157	0.155983	0.702931	0.201811	0.805068	0.085478	0.399213	0.367665	0.659253	0.676324	0.47937	0.261812	0.0192542	0.574206	0.911864	0.21343	0.144381	0.10052	0.325509	1.34744	0.266156	0.338238	0.488932	0.19494	0.36181	0.803184	0.161258	0.707354	3.94066	0.204413	0.642792	0.333647	0.445435	0.641103	0.127685	0.169881	0.175139	0.282221	0.796256	1.47481	0.678305	0.744469	0.394104	0.178222	0.408044	0.314257	0.349645
CCR7	3.13075	1.00636	0.726128	0.539847	0.878508	0.463258	1.43579	0.385639	0.649703	0.472628	1.126	0.788197	1.17319	0.617804	0.071397	0.698825	0.592535	0.445544	0.419384	0.254707	0.431082	1.5513	0.526369	0.744938	0.6124	0.385527	1.17831	3.29216	0.126237	2.11182	25.6531	0.928539	1.55428	0.427868	0.563532	2.73536	1.07321	1.23889	0.327812	0.913319	0.803769	0.688664	0.884147	1.28027	0.370219	0.497226	0.465564	0.663328	1.64227
CCR8	0.301643	0.0759914	0.102774	0.0611467	0.110222	0.0135619	0.0270509	0.0201048	0.0469484	0.0172953	0.0986742	0.0454499	0.101475	0	0	0.0207778	0.0245114	0.022311	0.0339591	0.0354642	0.0437493	0.14488	0.0250405	0.0289292	0.0153332	0.0458508	0.0221999	0.219383	0	0.0767875	1.93097	0.0240395	0.103942	0.00980943	0.0369771	0	0.13729	0.0399569	0.0235392	0.0362071	0.0780346	0.15417	0.0725185	0.121811	0	0	0	0.022743	0.0731006
CCL2	27.368	4.27658	13.3531	17.3519	31.6732	12.3575	9.0479	60.6016	13.6364	10.1006	22.6764	21.2747	155.99	15.8044	17.8102	10.59	14.1603	39.2745	5.22854	6.31541	8.60858	19.35	6.63058	34.0202	6.46165	9.30102	141.799	13.1114	51.7603	12.9013	17.9817	5.59177	15.878	11.7961	10.0858	7.69439	53.8813	12.6487	8.69346	42.2504	168.268	54.8661	7.55587	3.49629	25.7878	6.44609	3.4982	5.65998	8.69594
CCL21	24.4022	23.6734	74.3574	69.6889	120.641	36.2523	34.7463	45.1674	38.3278	51.4126	7.98251	47.045	201.147	202.952	20.697	18.5828	35.4352	56.8228	32.2607	13.5909	141.907	70.7546	25.6812	18.7755	35.6285	106.714	13.0886	101.215	70.0977	244.216	57.7751	53.0468	134.798	6.53438	10.461	67.6016	66.1543	8.29275	31.8137	59.0142	116.096	149.264	4.73759	40.9619	67.0625	45.101	12.4051	59.4964	2.71105
CCL7	0.131623	0	0.0348799	0	0	0	0.0206564	0	0	0	0.064585	1.20315	0.0172196	0.0170993	0	0.0158663	0.149738	0	0	0	0.0167038	0.691454	0	0.0662723	0	0	0.666786	0.223365	0	0	0.0707767	0	0.086587	0.0149813	0.0188242	0	0	0.0305117	0	0	0	0	0	0	0	0	0	0	0.0279104
CCL11	0.0394776	0	0.125538	0.0149382	0.0448787	0.0496978	0.264341	0.0368371	0.133811	0.0211262	0	0.0370114	0.0964072	0.0410288	0.0110636	0.0253802	0	0.149891	0.0622216	0	0.0935196	0.420307	0.122348	0	0	0.0560068	0.180781	0.0148876	0	0.0312654	0.0377388	0.0587285	0.0346268	0	0.0451676	0.327451	0.0628874	0.0488074	0.0431297	0.147423	0.152511	0.125546	0	0	0.0452909	0.0146296	0.162322	0.0277806	0.0446463
CCL23	0.557946	0.325713	0.224332	0.371288	0.196846	0.460187	0.289862	0.377007	0.586919	1.97682	5.06012	2.94915	1.08735	0.279937	0.0485267	0.185536	0.80984	0.557835	0.424535	0.781142	0.605524	1.32606	0	1.29162	1.25965	0.600492	2.4449	0.674762	5.93828	0.639966	0.551764	0.343458	1.16441	0.70075	2.9717	2.9922	1.04205	0.856313	1.26116	0.668179	1.95108	0.45889	0.906579	0.326314	2.38385	1.92504	0.210955	0.467094	0.29374
CCL24	0.253139	0.194794	0.439079	0.57472	0.824074	0.202792	0.115569	1.0522	1.23689	0.923631	1.0238	2.8479	0.578041	0.52617	0.116087	0.0887689	3.19395	0.333616	1.23321	4.77267	1.63546	1.66348	0.21396	3.9241	3.14438	2.44859	3.96765	2.68162	0.189049	0.164029	0.527976	0.410814	0.383513	1.4668	0.868872	0.33404	0.678189	0.213384	1.25708	0.489842	0.100016	1.64665	0.216874	0.260205	10.3361	0.255841	0	0.0242911	0.46846
CXCR4	23.5646	24.9041	22.1023	33.802	16.6458	11.7664	21.0407	4.69437	22.8889	13.4988	15.6802	17.8757	32.4605	13.6221	2.75359	16.6909	8.52682	18.1671	8.64371	5.29629	10.831	22.2055	20.2413	6.92625	15.0388	13.5318	10.3759	35.1971	18.3716	18.2784	197.815	29.255	9.37977	4.67391	13.4111	24.7832	26.2137	10.8215	2.65746	7.79614	21.2636	14.6794	15.0503	27.8917	5.93282	15.7925	56.9642	18.3167	30.9314
CCR4	1.36253	0.427163	0.267459	0.838463	0.594545	0.225238	0.316788	0.0770545	0.0799716	0.0662865	0.654315	0.0903222	0.523358	0.100126	0.073284	0.141571	0.271392	0.209024	0.130153	0.0503413	0.111783	1.21852	0.0853075	0.21559	0.18283	0.149695	0.352941	0.602063	0.0376876	0.719396	9.7689	0.465791	0.494945	0.108611	0.251946	0.266369	0.807543	0.544499	0.130313	0.174745	0.624741	0.218844	0.302642	0.356626	0.0157896	0.0612033	0.125755	0.508466	0.723767
FAM19A5	0.917349	0.814385	1.15264	0.695936	1.06829	0.394335	1.34837	0.271412	1.21559	0.660939	0.567967	1.15162	1.38629	0.92549	0.0376224	0.75087	0.758525	0.880416	0.543078	0.432113	1.4538	0.707118	3.50524	0.829145	2.28014	0.285682	0.93136	0.501199	0.441134	0.414648	0.981751	0.409406	0.726129	0.301523	0.629741	0.872256	0.377807	0.547711	0.415552	0.491297	0.434348	1.43021	1.77121	0.891784	0.947191	0.547239	2.8642	0.883293	0.933709
PPARG	21.3648	5.43114	4.08071	8.19857	6.19365	8.04492	7.2478	69.6805	4.25163	42.9875	51.8521	27.2569	9.23362	25.4686	1.01496	3.39438	27.2797	6.58471	19.442	73.6864	13.603	8.43615	5.37548	36.1921	32.5665	56.538	32.6969	29.3521	16.0455	13.0197	4.60442	5.55606	40.6651	56.3583	25.2352	7.62279	15.7284	11.1939	58.3073	16.5911	17.2806	5.88011	4.23327	8.5015	64.7881	4.59984	3.27069	4.71188	3.64931
MIF	4.54514	14.0165	14.1549	5.63922	11.1782	8.86479	43.6581	1.57699	64.5005	9.72239	5.15989	18.6173	18.9608	5.64187	2.16362	23.3972	3.33547	4.79934	8.7579	2.45862	6.29129	7.98503	16.2785	5.29469	9.74925	1.92537	5.71646	21.3362	5.58949	10.0841	9.71189	4.41405	5.15458	3.36919	5.62505	27.0405	4.83371	14.0325	5.41323	12.9809	9.58941	17.6049	16.3924	14.35	12.757	8.98157	17.7935	14.866	23.0007
OLR1	5.45749	1.15981	1.44254	4.53442	2.24142	0.30405	0.880538	0.0433402	0.411576	0.872437	0.188403	0.875259	7.55906	1.74744	0.05467	2.28434	0.634073	2.79919	0.256221	0.0305802	1.17417	4.21631	2.23477	0.342996	0.383426	0.388774	0.571087	1.09824	1.62981	1.73808	2.96377	4.15095	0.497023	0.0761266	2.01405	1.66624	2.93737	1.22312	0.289239	1.52461	2.32144	4.21526	0.781643	0.603953	0.0319718	1.7195	1.01855	2.01992	5.64149
RNASE2	0.771059	0.132658	0.199347	0.213487	0.416897	0.165725	0.259724	0.0350969	0.245873	0.271731	0.295295	2.03644	0.452703	0.0586359	0.0158114	0.0362718	0.256737	0.214215	0.0592823	0.103183	0.725542	0.885208	0.174852	0.353511	0.18737	0.053361	1.05928	1.10637	0.551765	0.446825	1.32138	0.167862	0.412387	0.376734	0.451855	2.74934	0.52427	0.313887	0.226007	0.610997	0.653879	1.25596	0	0.053161	0	0.209078	0.206205	0.436726	0.22332
VAV3	14.3745	13.9263	24.5683	14.919	17.6954	19.8315	19.5354	0.55941	20.2884	5.59299	0.692462	3.441	6.31943	13.1168	0.246271	25.6753	3.26348	13.6049	22.339	0.332141	10.7674	9.8877	7.96601	1.26379	22.9803	1.78693	0.893357	10.4344	17.2867	21.2383	9.28259	24.2957	6.4146	0.574338	8.98618	12.8488	8.88751	15.6845	2.33826	13.9621	10.6089	11.083	12.9639	22.4999	0.373019	24.7994	14.295	19.9986	25.4581
VAV2	4.92034	9.04266	9.72651	3.96291	7.25254	7.03409	10.1964	1.65089	9.2494	4.67779	2.19403	5.5454	7.01701	5.38637	0.481117	6.83907	4.01125	7.06683	8.41676	1.53832	3.93239	5.95255	9.86848	4.26448	6.07841	1.83286	2.97126	4.8061	1.7156	9.58565	11.6062	6.59945	4.56343	2.17756	4.5831	8.77287	4.88834	8.47598	2.91846	6.58172	4.80762	6.69633	7.09528	7.85849	2.49849	6.77865	8.10344	8.75993	8.44008
RAC3	2.36181	7.6085	5.31258	2.54388	5.61301	5.68898	9.5495	5.48358	12.8051	6.29966	5.09795	7.54508	3.24069	5.48906	0	5.89131	2.46474	7.20223	7.12261	5.31598	2.35064	2.70422	10.504	4.25733	4.60563	6.46395	3.14886	8.04762	1.68052	4.49583	2.82668	5.16655	4.95064	5.46957	3.47885	8.85998	2.14039	4.93179	5.32315	4.48979	3.44853	5.62217	6.78507	6.92599	11.8252	3.95926	11.6228	6.07554	7.85537
NFAT5	7.18812	8.23067	12.9547	14.8564	6.57672	7.43496	2.07275	4.99719	1.33055	5.39824	4.11317	0.642822	6.12957	7.76028	1.96449	4.96243	6.71688	7.32682	10.7249	2.89649	6.58057	7.06421	7.99477	5.36907	5.18876	6.0096	1.46824	1.75416	3.77238	6.60576	6.97415	11.1119	4.32374	4.43495	10.8262	2.12643	9.87776	9.11596	4.45668	7.66204	5.39552	1.95234	3.936	8.97022	1.15312	8.87969	6.97453	7.75471	5.63946
FOS	465.67	201.513	371.521	199.104	510.054	304.725	42.5788	709.113	144.86	421.803	593.97	499.358	1614.9	732.16	725.457	413.501	130.631	146.857	206.401	634.157	107.056	711.5	46.8754	460.859	315.608	912.131	875.663	248.178	1956.73	363.566	766.188	96.7302	156.111	100.376	497.553	147.321	520.872	378.702	24.4614	245.821	1900.52	141.337	410.082	374.747	1250.62	107.963	144.831	222.449	944.423
NFKBIE	3.54832	4.66441	3.46381	2.44178	4.97187	3.75361	5.89843	1.05233	8.79862	2.86155	1.46127	6.52953	4.12247	2.68719	0.851032	3.97886	2.3344	3.77685	2.83532	0.784766	2.06652	5.9372	5.88204	1.80228	1.88703	1.05363	3.44251	5.5143	1.0007	6.28698	10.894	3.58455	3.51764	1.40259	2.51767	5.35591	3.58426	4.24407	1.62275	3.99986	3.70594	4.25786	5.75476	3.91102	3.3608	3.60232	5.1724	4.34357	6.67259
CD19	0.282823	0.155167	0.188758	0.136747	0.151828	0.0725272	0.0723319	0.029323	0.0989075	0.0840841	0.102798	0.162039	0.0712601	0.0653192	0.0132102	0.0151523	0.0357499	0.357947	0.090804	0.0229887	0.0478563	0.105654	0.267825	0.0562577	0.0670906	0.111456	0.0827453	1.52875	0	0.22399	15.9591	0.151934	0.284822	0.0286142	0.0898853	0.190062	0.0834324	0.174832	0.0572199	0.0997487	0.0607007	0.162397	0.00705123	0.155453	0.0901307	0.040759	0.136389	0.221138	0.595281
PIK3R1	52.3391	41.2068	59.6645	61.6617	45.2219	60.0237	35.8103	12.6855	22.5187	32.6844	23.8143	17.0041	23.2976	38.9811	7.27209	39.8213	37.6679	49.5629	74.3162	21.2141	68.7592	36.4697	34.5758	19.8824	32.7491	21.1353	8.95964	17.4482	31.2079	29.6292	39.4684	44.4656	31.5187	17.6071	56.1893	28.3918	34.8143	37.909	42.634	38.6129	23.3401	25.6221	39.8225	75.1792	11.2561	68.6774	33.6796	42.7051	35.592
PIK3R2	0.160066	0.239101	0.199611	0.117574	0.203373	0.169896	0.18126	0.0732156	0.54255	0.115891	0.065708	0.203031	0.128108	0.117427	0.065968	0.230026	0.0856924	0.1235	0.192923	0.0757678	0.146575	0.14773	0.21156	0.0716388	0.134013	0.0846003	0.133664	0.159785	0.217315	0.160325	0.130513	0.210106	0.118374	0.0485831	0.122091	0.208264	0.109993	0.162972	0.0617201	0.123065	0.127312	0.116031	0.169017	0.20849	0.075615	0.125613	0.2624	0.185523	0.303479
IFITM1	336.629	40.5449	41.7377	42.7582	74.9005	60.8897	91.2453	46.2123	68.8107	74.4221	76.8618	128.773	113.958	77.336	11.4623	31.0619	87.2562	39.2215	57.0666	43.0487	83.9296	101.2	47.3659	111.138	77.2066	42.9361	140.581	98.6131	134.016	182.671	100.575	34.8378	108.27	62.238	70.3812	148.825	79.6465	72.8264	82.3733	89.6682	111.497	90.6545	52.6571	41.6603	174.208	49.1392	43.7863	81.8075	53.1245
IGHA1	1448.29	2245.44	825.35	2374.75	6112.87	1089.89	1232.79	0.536159	1157.8	535.318	41.2011	2625.1	1801.9	5167.18	0.322057	410.606	562.436	4316.47	1795.76	8.09856	1265.52	3670.72	1772.06	9.75504	818.836	1793.07	69.4298	2176.18	313.711	1402.61	3202.23	1726.25	453.678	19.277	1358.56	1912.53	764.301	1357.05	610.881	877.902	418.428	1200.54	354.641	1014.24	29.9278	1625.78	993.715	1355.48	1370.62
IGHA2	754.391	727.188	209.894	211.539	1572.59	273.227	254.997	0.346382	486.185	106.378	6.33176	1099.17	403.925	2012.05	0.0222924	51.4335	475.948	2230.4	547.148	0.421884	584.974	1146.27	1020.73	3.77371	435.507	408.687	24.6151	149.313	86.3193	464.625	1522.08	499.238	84.8064	10.5266	487.525	580.632	130.579	397.925	165.392	372.559	88.6562	308.605	57.9188	341.686	3.87848	388.164	447.121	741.853	307.819
IGHE	0.0100558	0.0141865	0	0.0228304	0.0342947	0	0.0883751	0	0.0146077	0.0161439	0	0.0141414	0	0.0104509	0	0.00969731	0.0686389	0.0937157	0	0	0.0204184	0.0676176	0.0701204	0.0135017	0.271937	0.0713306	0.00690733	0.136518	0	0.0477837	1.29774	0	0.141123	0.137346	0	0.573435	0.0240282	0.0186485	0.120847	0	0	0.0839457	0	0.0142127	0	0.0111794	0.0275646	0.0106145	0.0682341
IGHG1	126.018	19.5401	11.8402	31.9762	66.4347	9.02778	60.1827	1.80763	15.2347	3.11449	18.4198	23.1661	133.49	41.1797	0.339215	10.4253	21.5101	8.94825	10.4578	2.20458	21.9485	64.9127	4.5606	3.62883	9.4438	30.4117	28.1376	345.285	2.75343	72.0536	2044.77	35.9852	85.6031	6.74624	21.9365	176.525	23.2788	29.4475	39.2639	270.156	15.7497	31.8393	12.8692	13.3776	9.1974	7.38268	35.5275	275.445	14.6217
IGHG2	64.4965	50.2022	35.4063	17.7273	82.09	26.4804	47.2119	1.1353	29.2627	10.1894	35.7136	59.6031	93.5869	100.351	0.158183	8.76955	69.4066	58.3442	30.5834	1.5966	40.33	83.9	25.7729	8.13434	15.8353	27.0126	30.1038	677.328	4.946	199.447	844.98	46.3365	83.35	16.4009	30.668	229.07	28.7827	73.7378	80.8915	90.3972	42.2483	75.7649	17.3765	45.9337	7.59799	11.7135	82.4152	71.2839	24.2782
IGHG3	34.4743	9.91394	4.02324	9.9344	20.3109	2.38494	23.9415	0.984812	7.96092	2.08377	6.42457	17.0638	46.8729	12.8832	0.132272	3.80561	9.64259	5.573	6.76744	2.39536	7.58704	21.114	6.53667	0.616114	4.4505	12.9735	6.52011	145.381	1.91559	50.7977	785.894	11.322	20.4751	2.19062	6.63011	33.8883	7.53951	10.6129	18.6635	28.2081	5.87848	14.017	4.36859	11.2201	2.83151	1.64704	11.2846	16.8974	5.62689
IGHG4	22.1039	3.45491	5.03034	12.7189	2.7912	2.06062	19.2921	0.118401	13.1608	0.509276	7.38841	2.3019	16.9322	4.04853	0.0640084	7.36635	4.74919	1.94463	1.09995	0.194932	4.07083	65.5278	1.23873	0.528145	66.8763	1.92617	1.98724	37.7403	0.372281	12.9937	850.357	2.90225	27.0896	1.51356	2.67125	522.559	2.35483	5.81225	27.7115	29.767	0.827209	12.3026	10.916	5.95413	0.633243	0.437307	15.5302	24.4302	1.44219
IGHV1-45	1.83099	6.38468	2.12394	14.2751	7.83505	1.04377	2.08193	0	0.602219	2.49583	0.180817	0.534414	2.78408	10.8072	0	1.16604	4.20529	6.9043	14.2115	0	2.66562	5.57524	3.212	0	3.78615	13.9683	0.0711909	7.38695	0.12163	7.26418	7.827	2.11998	0.757548	0	1.73915	1.71931	5.28316	1.28134	0.2642	1.47072	0.500485	1.73038	0	4.44334	0	2.61169	1.84662	5.21467	0.996285
IGKV1D-42	1.18006	0.32222	0.605254	3.37058	3.11576	0.335449	0.669092	0	0.829464	0.183339	0.099619	1.76658	1.51394	2.37373	0	0.330384	0.822808	2.44392	1.01996	0	0.966178	2.49569	0.619366	0	1.57122	0.594052	0	41.5588	0.223369	1.49231	3.87551	0.594607	0.166945	0.0346617	0.914613	0.552555	0.545755	0.564753	0.124764	0.383815	0.110295	0.317778	0	0.591826	0	1.22728	0.730424	1.16526	1.09778
IGLV2-33	1.27513	0.145859	0.109592	0.899807	1.17534	0.0867701	0.475951	0	0.300379	0.0553282	0.0450945	0.0484652	0.252484	0.787979	0	0.0664689	0.156825	3.4973	0.27159	0	0.629798	1.5063	0.400526	0	0.735771	0.0488926	0.0473454	0.077979	0.0404449	0.245646	2.32263	0.730578	0.0604568	0	0.394303	0.607446	0.576443	0.447382	0.188256	0.231655	0	0	0	0.292257	0	0.153256	0.188938	0.181889	0.175388
C3	226.128	43.471	82.4913	55.0282	103.006	41.4929	97.2945	69.5275	37.2348	210.341	132.678	252.003	225.7	127.262	8.65646	45.5466	249.939	37.7284	42.8959	85.4315	188.851	196.69	104.951	190.545	154.624	92.4103	150.643	233.809	37.0182	123.251	299.387	71.7304	265.665	142.413	75.4192	215.633	177.235	121.072	277.242	196.125	250.025	246.985	23.4174	43.2548	109.21	54.6934	49.6726	83.7493	64.6273
CMA1	1.25774	0.876505	3.32496	2.11585	3.25584	0.419682	2.68254	1.85233	1.0346	4.59797	6.92001	6.58485	5.67775	10.6462	0.777153	1.63668	6.44742	2.10266	2.26895	5.00509	21.0769	3.43897	2.3599	4.47615	4.14105	3.5257	17.258	5.29741	8.90962	3.43834	5.14978	2.19793	3.01716	3.6841	0.676164	10.0553	12.0938	5.81712	12.3337	10.6952	2.52459	4.35524	0.18361	0.514023	4.58961	0.741255	0.124614	0.783772	0.514123
CX3CL1	62.1727	106.491	58.7889	122.478	90.7659	94.7628	64.1313	14.7549	98.8001	96.9949	15.4737	50.635	82.3598	48.8058	2.32247	56.2534	16.0558	141.584	45.7381	10.3567	44.4677	66.5125	88.0218	8.37391	43.2152	22.5511	7.35032	51.0907	32.7501	77.3663	75.771	78.9771	27.4165	9.88625	67.9543	70.3135	104.207	48.2798	10.1609	54.7851	70.1021	103.984	104.231	113.04	27.4852	74.5471	79.9891	53.7205	102.434
CYR61	142.919	86.3183	221.456	545.98	435.709	217.787	110.19	498.328	142.92	236.875	255.428	123.71	520.226	342.692	72.5493	224.151	46.268	601.264	61.2028	160.852	33.3932	279.865	109.456	142.59	133.792	328.2	246.975	273.24	443.094	123.378	176.009	105.854	62.0016	48.6609	145.069	145.046	367.936	356.136	16.8519	522.339	608.769	246.933	191.275	228.468	255.094	184.094	82.3924	93.1004	222.363
EDN1	15.7562	13.1834	17.1087	29.0177	12.8266	23.0621	16.8444	2.02027	7.68022	15.1482	6.76263	9.14407	15.1309	8.62319	1.05694	13.3222	8.02486	23.0488	6.18644	10.6221	5.67965	13.3845	29.367	10.2495	24.4936	14.4762	10.775	18.7581	22.6713	14.4781	29.3033	20.0266	12.8829	10.1561	16.469	19.3706	40.4252	10.012	4.01352	11.9713	17.0691	9.13701	9.13951	32.7233	10.18	22.9365	8.4811	11.6186	9.07544
EDN2	0.667056	0.329985	0.578518	0.127845	0.812485	0.872466	1.51183	0.282927	3.2468	0.458964	0.192704	0.779701	0.73441	0.504194	0.00728345	0.835424	0.118265	0.179414	0.355006	0	0.483738	1.12136	0.0805451	0	0.419227	0.0245806	0.00595067	1.28392	1.07767	1.68779	3.08072	0.44462	0.425521	0.00788825	0.87223	0.889226	1.83543	0.498035	0.075716	0.562907	0.665166	2.2109	1.74947	0.685677	0	4.37252	0.118735	0.795561	2.23378
EDN3	4.46399	10.7533	18.5615	6.67628	10.1374	6.44156	4.22505	0.0297176	8.23498	2.96551	0.0486178	2.42598	3.83317	7.55763	0.856828	8.98337	1.26809	14.6205	16.3639	0	10.1635	4.89872	8.29093	0	3.91341	2.05579	0.0291683	1.53731	2.80317	3.71404	4.06441	3.1684	1.58295	0	5.31388	10.7262	0.739858	10.0897	0.533508	2.42024	3.79102	5.80471	7.88217	12.8137	0.00913437	8.51524	16.4415	14.0744	7.54565
SAA1	737.575	249.776	39.3088	78.5687	319.853	188.49	157.176	554.453	148.345	1958.24	632.85	1291.71	596.09	269.633	6.49154	77.0186	511.702	82.4134	278.027	540.149	59.7343	252.45	43.7025	389.635	1460.16	568.949	1476.79	1660.61	120.324	266.619	193.727	153.347	1057.38	1885.63	434.651	633.011	107.194	179.916	359.399	2076.16	502.229	177.697	409.479	351.943	1651.64	198.359	53.4721	120.058	317.094
SAA2	31.0881	5.16299	2.35864	3.36551	12.7312	13.8053	2.95374	7.2284	5.9646	186.876	6.45716	11.8981	29.9812	4.36671	0.70221	5.39219	36.0922	2.81911	11.5563	14.895	4.02621	14.5015	2.10439	9.70766	199.016	14.1829	58.5759	102.816	3.38953	8.92236	9.54465	2.84544	25.3388	117.219	13.9329	44.5615	5.17474	5.61631	6.89591	106.992	14.5384	7.68716	11.176	22.5735	9.89666	9.1721	0.978709	2.90734	16.9158
SEMA3A	1.14093	0.254373	0.430432	1.01309	0.653682	0.814478	0.555473	2.65378	0.541458	1.13356	2.50204	0.494344	0.664448	1.21096	0.0369427	0.293695	1.59272	0.544437	0.597029	2.11488	1.52445	1.06724	0.457842	2.01609	1.1818	2.17753	0.979374	0.728531	1.35319	0.970192	2.37473	1.13604	1.78219	2.33853	1.6937	0.556126	2.16506	0.567601	1.02798	1.4768	1.14582	0.608946	1.24638	0.473278	1.2594	0.838876	0.107987	0.454219	0.282737
SEMA3D	2.86371	1.76411	4.04363	6.79159	2.94317	3.19269	1.48149	1.70421	0.427257	2.46274	1.60624	1.01052	3.43586	5.5937	0.207301	1.48101	4.35182	3.79702	1.57392	0.763377	5.87022	2.85706	2.82465	1.31478	1.87001	2.77845	1.05371	1.60796	4.10899	2.70318	1.4395	3.87699	3.23633	1.78008	3.98172	1.53754	4.11016	2.18178	3.07091	3.25756	3.17658	3.20514	2.36162	3.241	0.63041	3.5009	2.20386	4.75916	1.15026
SEMA3F	10.7153	14.1373	15.5684	5.49745	11.6545	12.3893	10.919	4.29648	16.0657	9.96168	4.36178	9.14805	11.5749	8.41492	1.3679	16.6831	7.54767	6.99807	13.5684	5.19462	5.60665	13.9475	9.8887	9.50057	14.9747	3.46025	12.0328	10.7812	3.42174	12.3239	9.27722	9.87418	13.4889	6.65463	9.03824	15.6337	9.55874	18.1473	6.62472	14.4237	13.4647	10.3472	11.4632	11.1236	15.4475	9.1487	11.1336	12.4038	15.0679
SEMA3G	31.1659	18.5643	17.024	7.24052	9.33501	13.5692	17.9154	51.4047	8.81679	61.9897	104.856	52.8261	25.5454	27.181	2.67529	8.39426	89.4202	18.5232	20.9097	69.5422	8.48065	17.2004	16.9199	118.133	52.0414	30.6518	58.1335	68.4253	7.34901	20.594	13.8267	13.7491	57.7123	73.5248	21.4453	19.1167	11.8554	24.9969	37.6586	41.6356	26.8752	13.2497	9.90699	18.7267	70.5483	12.3328	33.3871	16.507	12.9013
SEMA5A	11.4053	15.6581	25.7181	23.7197	9.45105	20.0586	9.00536	1.29457	7.93872	8.6794	1.87678	2.80442	7.02547	12.2194	1.01643	12.5765	5.0474	17.1994	27.4221	1.04326	13.1475	10.0729	20.0634	2.05505	5.62656	3.70504	1.43754	3.54418	8.769	9.47612	11.9313	26.4549	5.30202	2.65374	16.1822	9.53249	15.1563	17.1263	3.19941	7.61489	10.7466	8.08368	20.3342	24.8046	1.24424	17.7375	12.815	18.0813	9.51161
SEMA5B	0.310256	0.238162	0.183781	0.0906394	0.136154	0.203904	0.157529	0.170297	0.139186	0.197773	0.182088	0.275903	0.470359	0.208642	0.283863	0.0857987	0.155717	0.118115	0.258884	0.205272	0.125069	0.928069	0.615101	0.346123	0.305216	0.194188	0.74747	0.258093	0.0321272	0.151766	0.336936	0.323255	0.256125	0.388447	0.182707	0.172667	0.172619	0.224225	0.204372	0.140566	0.221431	0.231251	0.199635	0.190236	0.314067	0.169926	0.27515	0.274516	0.0619194
SEMA6A	5.45479	7.71744	4.81769	7.14995	4.83976	7.96985	3.79928	2.68102	3.96669	5.98385	3.36273	2.70646	7.4221	5.27313	1.52325	4.5667	4.18716	5.34787	3.83197	1.9554	4.61566	4.57511	5.32885	3.42796	4.38825	4.47517	2.78191	3.84291	3.87685	4.7219	3.53087	5.1809	4.82204	3.23811	7.64074	3.80403	5.53902	5.40283	2.97334	7.69215	6.21829	4.07716	3.58553	4.63058	3.62413	5.67241	4.70173	3.92338	3.09328
SEMA6D	3.99589	5.36353	12.5522	6.48686	4.31631	7.33153	2.10544	4.55824	5.7083	1.89605	2.55678	1.20599	2.01901	4.82523	3.24378	3.26639	2.97585	5.16493	9.27842	1.73644	3.53143	3.88987	5.52498	1.8218	1.46611	3.75813	1.52222	1.69832	2.47614	3.87208	2.63777	4.68783	2.07762	2.474	5.88512	3.14554	3.76667	9.45908	2.04234	2.73912	3.10231	1.02666	6.00497	6.67458	1.52144	2.87677	6.50202	9.4268	7.92946
SEMA7A	1.11705	0.878608	1.01642	0.826674	0.943984	1.12002	0.955657	0.282877	1.84768	1.19557	0.534646	1.49676	1.75194	0.660952	0.277038	0.743576	0.554803	1.83915	0.581679	0.430284	0.518539	1.479	2.22882	0.951226	0.792609	0.303863	1.25621	1.4017	0.232025	1.12738	5.26367	0.801476	1.07806	0.480068	0.531581	1.17869	0.750626	1.50327	0.291598	0.793688	1.14569	0.89204	1.02921	0.707909	1.2135	0.769303	1.1652	0.768686	1.0453
SLIT2	6.92541	2.16979	5.83926	3.77565	4.56469	3.24475	3.02126	3.22633	2.16412	6.66347	5.66436	3.77067	8.60078	8.68049	1.55366	5.1319	10.084	4.22831	3.20985	3.008	11.0149	6.78074	8.86931	4.53053	8.1049	4.53401	4.81532	3.73805	2.13095	4.43922	5.92229	3.98008	5.76797	6.1609	2.60607	3.36057	9.52297	6.06777	6.67803	5.88814	7.12492	11.6345	0.572767	1.42164	2.54106	4.20314	1.24033	4.35956	1.16316
TYMP	15.4029	8.20035	7.08266	1.39092	6.36931	5.41203	9.725	3.6436	16.2163	10.7135	11.0397	32.3931	14.7806	4.15954	0.919646	11.8364	7.19144	5.74245	5.57973	5.9131	1.6744	7.29113	13.4911	22.5823	10.4274	1.41951	14.6021	19.0951	1.00507	15.6236	24.8042	3.32545	9.54975	8.89074	2.26046	25.4914	4.45752	9.52939	4.62266	9.42829	7.03886	10.6735	5.72506	9.48585	10.2072	5.82112	6.03749	8.78493	10.4431
CX3CR1	13.9929	8.59347	5.41083	12.264	14.5604	4.00529	6.34536	0.619862	7.16126	4.62141	1.27079	3.48	8.5463	6.37505	2.02825	3.22928	4.91883	4.07901	3.92475	0.464648	21.2859	14.9222	6.93477	1.27269	1.03949	1.78566	2.57771	4.12689	13.3854	10.7205	3.58739	8.02286	5.42801	2.47257	11.2495	8.41006	16.8417	7.43481	3.56083	11.5984	7.7496	8.1538	9.08985	3.26144	0.715318	4.33612	6.75663	12.5519	9.60171
CXCR3	2.48555	1.80153	0.427026	1.56178	1.73684	0.42103	0.944767	0.063834	1.66731	0.597947	0.238702	1.94546	0.795529	0.56878	0.102249	0.256553	0.441008	0.362064	0.503169	0.0667264	0.763984	1.53334	0.583036	0.367407	0.259647	0.366642	0.57955	1.4619	0.410338	1.90529	8.33805	1.17882	1.18674	0.269927	0.695729	0.945715	0.544879	1.74792	0.290648	0.425776	0.726775	0.516693	1.842	0.612362	0.366255	0.219711	0.625072	1.06711	1.67627
EDNRB	13.8448	5.98064	13.6369	11.8524	9.56604	7.68603	5.75966	11.336	3.01122	14.2072	13.7471	6.02136	12.5695	18.0853	2.41656	7.30509	15.4958	15.0871	8.1991	7.87421	11.7186	7.89762	12.3088	18.4978	11.8901	16.9057	9.52362	10.7775	7.03222	10.1462	5.67273	8.25592	8.8053	14.7622	6.17865	10.3703	9.07402	8.39734	11.2305	7.81707	7.20809	7.67964	2.73737	7.36451	8.83519	6.38781	6.30315	6.80332	1.91675
GPR17	0.489063	1.25993	0.490231	0.434488	0.444175	0.481832	0.153504	0.252978	0.123555	0.853433	0.862519	0.635437	1.26295	0.944738	0.0893865	0.230688	1.9715	0.390831	0.862988	0.536659	0.501921	0.795336	0.333617	1.69873	1.15762	0.324291	0.262908	0.583368	0.0124772	1.33249	0.846114	0.806632	1.10506	1.27788	0.486568	0.391328	0.622412	1.34073	0.644653	0.738475	0.215634	0.342338	0.458037	0.743827	0.338478	0.561441	0.415295	0.841687	0.20741
PLAUR	1.77445	1.24494	1.89104	1.45017	2.77051	1.35955	1.56387	2.08383	2.62858	2.32197	2.43857	8.40461	10.2993	1.66538	1.16242	2.33177	1.73599	6.30409	0.843545	0.947352	1.79828	6.09444	2.53245	4.24745	1.42376	1.08018	9.04634	3.31942	1.71232	1.77873	4.40366	1.2867	2.28572	1.18352	1.18823	2.45416	3.0855	1.74874	1.47919	2.37338	6.0136	6.39026	1.81852	0.986079	1.82559	1.41668	1.1265	1.25766	1.96714
PLXNA3	1.79091	4.98132	4.55247	2.49826	3.91818	2.9613	2.90613	1.91212	4.20447	4.1191	2.15776	3.34045	3.14849	3.52598	0.526028	3.60615	2.28018	2.73091	3.21639	2.71696	1.56218	3.81374	4.00775	3.59634	2.63013	2.30681	1.21436	3.34443	1.09571	3.3865	4.47713	2.48521	2.24833	2.3771	3.07148	2.64889	2.93596	4.34888	2.8468	4.2722	1.78648	2.8241	3.00206	3.27502	1.76738	3.42668	3.74421	2.85546	3.7683
PLXNA4	5.07607	1.44252	1.08109	1.57914	1.60162	1.41058	0.910272	16.9037	0.697948	16.0772	21.7462	4.79678	1.30342	5.2602	0.524985	0.428207	9.79126	1.40725	4.15404	14.1151	0.796843	1.01471	2.70526	18.2585	12.5474	10.9959	4.62459	8.76183	1.28242	2.70447	0.853104	1.27146	6.63402	16.5346	9.24786	1.64103	3.93047	2.9529	13.3975	6.44752	3.24531	0.636075	0.623496	2.01517	6.47874	0.790618	0.943788	0.976778	0.598783
ADM	15.6197	4.79042	8.3947	3.06591	9.25546	2.12418	10.3365	15.6328	3.18724	12.6892	24.6079	38.7599	8.50732	9.76178	1.93689	2.68008	31.2363	5.43111	8.87587	11.5565	9.09049	13.524	4.17702	33.2889	6.64717	10.8723	28.6028	20.4312	12.1633	7.20506	5.06381	3.59622	27.1901	20.5634	12.6711	4.43057	7.66017	6.7815	26.767	16.4337	16.5059	8.07403	2.63037	4.69589	40.3105	4.32674	2.77804	4.84148	3.12825
ADM2	1.39132	2.0378	1.04538	0.731278	1.11548	1.51324	1.71345	0.130136	3.25598	0.831631	0.0521392	0.686447	0.688114	0.610836	0.00837529	1.57868	0.192658	1.66423	0.706542	0.0145749	0.380949	0.792656	1.92185	0.0579599	0.808178	0.131905	0.0387754	1.55152	0.257198	1.499	2.21885	0.97438	0.506785	0.0634952	0.535684	1.62503	1.01561	1.41018	0.199527	1.16438	1.12567	0.946444	0.992452	1.51122	0.0400003	0.904446	1.84775	1.35295	1.61103
AGT	1.53701	1.81865	1.43215	0.196993	0.200798	1.13911	0.529115	9.9932	2.85397	4.06951	1.63813	1.42938	3.76215	2.39611	18.3206	3.71152	2.17865	2.09859	5.05018	12.8467	0.604049	1.63572	1.91595	5.20088	3.76662	7.51764	1.69861	5.06942	0.458223	2.12042	5.73211	0.518617	2.05484	2.91759	3.83618	5.13426	3.40611	3.54	2.38339	1.85385	2.78336	0.953454	0.258661	0.954799	3.09297	0.248046	0.229348	0.595318	0.41003
AMH	0.0329311	1.53313	0.343251	0.0934574	0.0655139	0.0690941	0.165379	0.0973068	0.103648	0.0528687	0.0287266	0.115777	0.16084	0.0969709	0.189192	0.423428	0.0374635	0.085251	0.224915	0.00602266	0.0390057	0.0830387	0.178603	0.0294771	0.08593	0.00778653	0.00754013	0.111769	0	0.163004	0.157403	0	0.0818398	0.0299857	0.0125592	0.27884	0.0699452	0.488565	0.0299813	0.122976	0.0477076	0.0392726	0.406406	0.418897	0.00944509	0.122036	0.0376123	0.272292	0.176902
ANGPTL7	0.977038	1.67375	6.2812	0.468136	4.95493	14.4483	12.9358	0.219042	0.294921	5.6326	0.199238	0.785145	1.19521	0.55387	0.0960127	2.91839	1.05377	0.62412	8.42964	0.26455	7.74875	2.71966	0.280189	0.298146	1.67958	0.378033	0.239689	3.69651	8.20508	4.95177	0.745991	10.3561	4.06789	1.60599	4.71098	1.68398	8.31266	4.09446	0.790172	8.08854	14.5405	19.619	12.6585	12.6077	0.502227	15.8277	4.09559	12.0008	1.61439
ARTN	0.11218	0.278841	0.130235	0.115217	0.163964	0.174846	0.690794	0.0498461	0.302639	0.145793	0.0559186	0.142734	0.234816	0.0999324	0.00898237	0.906658	0.0668484	0.110632	0.159971	0.0468943	0.0759275	0.233482	0.223499	0.0573795	0.425777	0.0378927	0.0807259	0.247784	0.169266	0.177688	0.275757	0.107282	0.121823	0.0194565	0.128349	0.526168	0.140408	0.237757	0.0583609	0.466796	0.340511	0.1083	0.39555	0.271805	0.0919279	0.231614	0.102501	0.248102	0.244673
BMP2	3.71826	0.817719	1.49629	2.30517	1.5599	2.7152	1.1485	2.80361	0.315032	12.6668	8.08992	4.19759	3.68933	1.66786	0.702795	0.764291	7.36104	1.15958	1.02542	9.3328	0.760601	1.94876	2.4379	6.30537	7.08809	4.44159	3.88664	4.23785	2.8366	1.45209	3.2454	1.13063	1.51483	6.67445	2.12032	1.34093	2.96786	1.0091	2.48559	3.67526	4.89543	3.15055	0.49369	1.59387	6.73796	1.43344	0.394508	0.745011	0.481599
BMP5	0.63952	1.75882	5.69351	1.40301	1.30495	5.47728	0.645038	1.26725	2.4008	1.1363	1.03425	0.358731	1.12055	0.336058	1.39252	1.7185	0.490476	0.234384	4.65475	1.02898	1.42987	0.791204	0.668084	0.921379	0.72614	1.28447	1.1303	0.345499	3.82851	1.98468	0.875814	1.20659	0.819348	1.6161	0.994777	0.35761	0.718275	4.75062	0.765411	1.40072	1.0514	0.539869	2.84416	5.71276	0.90269	3.87844	0.940529	1.08084	1.68826
BMP6	6.55799	2.7453	2.26301	3.70488	3.55343	2.62976	2.59703	5.92873	1.23162	6.41218	6.9504	5.79637	5.86401	4.96313	0.901759	1.27568	8.64012	2.9829	2.4794	6.50687	2.78455	4.27581	0.819148	12.913	7.43669	9.70234	12.8264	5.52406	2.91907	4.35647	3.87428	2.62704	11.3565	12.0406	6.45136	2.96021	2.8924	3.18253	4.97175	6.11103	6.51875	3.67898	1.98723	3.62384	11.1449	3.39556	1.76405	2.36136	1.36895
BMP8A	0.117484	0.426199	0.284646	0.0762094	0.157407	0.27467	0.115893	0.0391522	0.255997	0.107779	0.120785	0.212422	0.237135	0.130822	0.0352765	0.242777	0.200481	0.191173	0.211622	0.101292	0.0340789	0.225712	0.331594	0.0901387	0.0716638	0.0476212	0.0576427	0.21836	0.0295449	0.269165	0.541492	0.243435	0.154572	0.0687704	0.0864111	0.24362	0.167099	0.124499	0.0733443	0.178624	0.0972574	0.0500385	0.146871	0.296517	0.0722058	0.205247	0.241532	0.274596	0.142356
BMP8B	1.24788	1.47226	0.880857	1.43538	1.23814	1.21991	0.748693	0.203515	1.05075	0.531873	0.288998	0.551314	1.17023	1.15345	0.0557071	1.06229	0.508806	1.58379	0.63965	0.130268	0.658685	0.816828	1.18717	2.37609	0.691584	0.415174	0.354626	0.443524	0.20412	1.23974	1.05304	1.06579	0.54243	0.27904	0.571728	0.455131	1.2666	0.762864	0.377025	0.869116	0.663933	0.750677	0.921784	0.924788	0.14253	0.761184	1.54005	1.2123	0.91326
CAT	101.725	46.0475	39.7918	80.0232	65.4167	50.3449	47.7167	265.104	29.6541	128.823	272.167	85.9677	61.8617	109.923	39.1939	40.37	159.6	54.3882	75.8962	184.477	65.2805	51.5391	38.121	180.789	118.973	237.308	123.688	80.8367	64.2685	64.4166	32.9764	45.7558	127.399	244.025	106.626	45.0666	67.9941	64.2674	176.174	87.5526	69.4289	55.8482	57.2791	56.0197	223.407	57.8687	50.0091	61.7148	68.194
CGA	0	0	0.0131792	0	0	0.0313041	0.00780495	0	0	0.0299412	0	0	0.00650634	0.0064609	0	0.01199	0	0	0	0	0.00631146	0.0104505	0	0	0.291989	0	0	0.00703313	0.0291827	0.0147703	0.0445711	0.00693608	0.599803	0	0.00711264	0.0257822	0.00990303	0.0115287	0.0475421	0	0.0180122	0	0	0.00878647	0	0.0345564	0	0	0.0105458
CLEC11A	1.56583	4.93625	7.75585	2.76502	3.79086	3.88156	5.86127	1.30777	11.7662	3.55351	3.35155	10.2897	6.26183	2.63189	0.780127	4.63255	2.1662	4.22372	4.06753	1.32578	2.28644	6.28816	18.3552	3.34826	3.50806	1.08329	6.3671	6.20021	2.17791	3.90402	4.32427	2.55586	3.3064	2.61393	1.32705	11.9457	1.95545	6.36332	1.75292	5.05688	5.15299	4.27649	6.40232	7.65027	4.09181	3.42786	6.637	5.29515	4.73863
CSF3	0.211063	0.0360925	0.48135	0.363024	0.163595	0.346221	0.0401498	2.32158	0.083619	3.77867	0.836889	0.0449722	16.9958	0.0332358	3.47373	1.35692	0.0363807	1.31134	0	0.28775	0	0.408569	0	0.317739	0.0364129	0.281287	0.931382	0.875543	0.0975779	0.0379902	0.137568	0.0356802	0.0224398	0.0058238	0.131718	0.0862078	0.34641	0.118611	0.0209626	1.26109	6.81958	10.2208	0.0861075	0.126557	2.74062	0.149321	0.0438301	0.0202536	0.0108498
CSPG5	0.224396	0.165169	0.234412	0.206739	0.210733	0.343901	0.412386	0.288288	0.562184	0.229727	0.251067	0.269833	0.176991	0.297432	0.0710895	0.978491	0.118391	0.198688	0.358803	0.446078	0.105656	0.262417	0.385518	0.170295	0.208294	0.627474	0.165308	0.275945	0.194647	0.208624	0.177206	0.166911	0.447845	0.216171	0.17488	0.327072	0.326378	0.199025	0.472547	0.185812	0.207301	0.0775678	0.205782	0.229825	0.492495	0.249471	0.343212	0.260893	0.209641
EGF	6.75989	11.9724	6.29833	19.2462	5.59166	5.40878	5.03635	0.369772	2.43728	1.82302	0.184971	1.57082	9.17774	10.7731	8.50457	5.77248	0.875274	22.166	4.81769	0.00508589	2.9386	6.2643	10.8	0.00311153	0.580515	1.91016	0.00795916	2.16559	1.97447	3.18247	2.40918	15.2628	1.33546	0.0232116	6.00282	2.52048	1.88457	2.74619	0.741817	3.03237	0.8091	1.3238	6.23676	12.0927	0.011964	5.04709	23.1609	8.79151	8.07082
EPO	0.160136	0.0451835	0.079214	0	0.145637	0.0134396	0.201051	0.00996172	0.0930497	0.0342785	0.0419074	0.0450398	0.078213	0.0665715	0	0.0720663	0.0242902	0.0552742	0.0504791	0.0234295	0.0975477	0.0717865	0.0248146	0.0430023	0.0607795	0.0454371	0.0073332	0.181169	0.0877016	0.0760947	0.0612334	0.083379	0.0936398	0.0194419	0.0366435	0.0442756	0.0595224	0.0791928	0.058317	0.0598007	0.0154661	0.0127316	0.086237	0.0301779	0.0183718	0.0356061	0.029264	0.135227	0.0181103
ESM1	0.590079	1.33047	2.71973	1.24401	0.368347	0.338259	0.218284	0.27039	1.85213	0.0930417	0.0413631	0.148183	0.937396	0.70635	0.385369	2.17456	0.131861	1.09113	0.365372	0.0809383	0.55094	0.885678	0.918461	0.0990355	0.209966	0.201811	0.524752	0.208619	0.179308	0.726029	0.80836	0.664248	0.249544	0.139123	0.409899	0.447931	0.411246	0.566692	0.293554	0.224291	0.244244	1.05557	0.411399	0.774435	0.0997324	0.480297	3.09781	1.45705	0.554127
FAM3D	6.21629	9.6981	4.05634	5.96573	7.39649	4.62125	20.7831	3.7566	6.42676	2.07103	0.305873	9.76468	10.6742	6.51454	0.00727901	13.2918	0.915994	9.01004	2.12874	0.0190008	6.02985	5.51607	23.6859	0.0348738	0.221808	1.5722	0.0832586	3.44781	1.52408	3.32211	4.75483	8.20114	2.10353	0.0157669	7.10236	7.48649	2.37908	1.95881	0.681029	2.52184	1.26681	4.49139	7.9494	8.4556	0.0595962	3.67683	27.8144	13.6808	17.4188
FGF1	13.5581	16.1352	21.2478	21.38	11.1261	16.9869	10.385	4.63404	11.6131	7.98156	10.295	6.62434	8.40075	10.4654	0.656284	10.2377	15.4793	17.1056	15.7184	6.54534	12.9014	8.85981	11.7748	10.0291	7.51284	4.74285	5.43588	10.3538	10.7024	10.7569	7.29104	22.9777	5.30509	8.20092	16.3069	15.4779	9.61984	17.2416	6.1667	10.7203	9.21455	9.40546	26.9942	22.3471	4.07627	16.1744	23.9909	17.6073	15.6164
FGF16	0.456082	0.060701	0.291892	0.0488433	0.117392	0.129997	0.0432158	0.859183	0.0125006	0.110522	1.30616	1.45219	0.918647	0.402455	0.513677	0.182568	1.60551	0.0534653	0.0813784	0.698767	2.1492	1.08495	0.0600061	2.12596	0.330696	0.769126	6.5021	0.584134	0.0706928	0.102228	0.22211	0.0768098	0.807629	0.77573	0.108302	0.124911	0.260456	0.207461	1.28799	0.144609	1.13446	0.790208	0	0.0729756	1.24394	0.105236	0.0235886	0.0545005	0.0291959
FGF7	9.21203	2.03714	6.35985	4.43574	6.08848	3.57386	3.24021	4.38054	1.36639	3.87967	5.47572	4.07632	9.05201	6.40188	0.462655	1.92935	8.25971	7.19576	3.7685	3.41009	4.76615	6.46833	4.5115	6.02258	2.36487	7.5437	7.78553	3.19488	5.23654	4.36578	3.73437	4.4787	6.60776	3.63375	3.61901	7.21597	9.05998	5.35176	5.42244	8.12195	9.1494	3.99098	1.58222	2.46897	2.33443	2.23608	1.91186	3.90394	1.29171
GAL	0.81916	0.138679	0.729378	0.148784	0.446992	0.219996	0.246829	0.244599	0.713977	0.280556	0.257247	0.706548	0.90306	0.124864	0.0183655	0.442376	0.236083	0.486328	0.447581	0.0119851	0.17742	0.440659	0.583905	0.469276	0.559639	0.123962	0.825267	1.79172	0.217905	0.0778507	0.689111	0.0609308	0.507744	0.119343	0.299913	1.93646	0.643758	0.587398	0.143191	0.122361	0.553806	1.00296	0.132341	0.21612	0.187957	0.145711	0.134727	0.11529	0.259395
GDF10	7.54996	1.54025	4.79441	1.4033	4.19623	1.79619	4.19917	8.75906	1.51045	5.23975	10.4384	18.6923	9.52812	7.76857	2.96739	1.53192	17.2833	1.94404	2.64943	7.3466	14.9197	5.27293	3.78639	14.783	10.3184	4.48277	11.5903	4.67271	4.25057	3.01944	3.08963	2.17844	10.0221	8.11077	2.20085	1.89261	4.45377	3.02096	20.1761	5.44902	10.4105	6.77184	0.357742	1.87783	12.923	1.05321	0.910483	1.29267	0.303778
GDF9	0.229501	0.739186	0.491132	0.742257	0.347047	0.359783	0.489291	0.161624	0.427743	0.298931	0.118987	0.13397	0.371625	0.391531	0.196593	3.72903	0.172417	0.645692	0.409498	0.137797	0.281361	0.34213	0.231496	0.151166	0.375956	0.251874	0.127901	0.244948	0.513264	0.308649	0.384973	0.35752	0.174714	0.307548	0.351758	0.206525	0.338002	0.345306	0.208156	0.213451	0.188197	0.232384	0.27983	0.452898	0.0968734	0.322543	0.474793	0.420513	0.404015
GDNF	0.0299061	0.0328152	0.0457895	0.030177	0.0339978	0.0376484	0.079266	0	0.00482706	0.0800206	0.0173919	0.0560758	0.0521664	0.0794299	14.0357	0.0224311	0.015121	0.0584952	0.0261866	0.0145852	0.0708455	0.039102	0.0154474	0.0133848	0.0993197	0.0188568	0.0205426	0.0300748	0.0194984	0.023685	0.0190593	0.0519046	0.0495482	0.00605141	0.0342166	0.12403	0.11116	0.0431363	0.0145212	0.0297814	0.0336975	0.059442	0.00447364	0.103324	0	0.0295537	0.0318802	0.0140301	0.0112739
GREM2	1.4335	0.706141	3.78613	1.28328	1.59091	2.28041	1.63303	0.21923	1.17227	1.14796	0.343064	1.0726	5.70899	2.34621	0.18894	3.28688	1.22406	1.60075	0.901602	0.552981	2.81048	1.05894	1.59872	0.338312	3.48936	0.391282	0.661905	0.666431	0.479519	2.39464	1.33293	3.34316	1.26034	0.527075	0.307764	2.06527	7.55307	3.23304	0.647277	0.946027	1.70676	8.06857	0.485919	0.90957	0.128911	1.88516	0.410679	0.794309	0.433213
HBEGF	3.96606	3.30537	5.04182	5.20186	10.9668	7.34412	1.78383	13.3369	4.19628	5.99715	13.1678	4.78351	24.1323	4.69887	22.0319	6.50603	2.46202	8.85684	2.0985	6.84556	1.97746	6.99145	3.72901	7.9719	5.4909	7.32197	12.2868	7.01522	8.08319	3.77259	6.80694	3.22824	3.10321	2.54464	3.83793	4.33649	10.3087	4.10068	1.83496	11.8749	24.4958	7.47343	3.71803	3.73039	10.5899	5.96266	2.37938	2.95482	3.8229
HDGF	43.6882	59.8854	52.3216	37.9221	50.5318	61.2654	90.97	32.424	82.3333	48.0373	39.0579	54.9551	58.4419	41.9334	34.9967	68.7555	37.5164	56.4169	50.7278	36.2078	37.2413	42.3205	69.8755	44.9959	60.0879	22.0532	47.0365	59.768	62.5953	65.4168	73.7584	57.0736	42.9791	37.7577	36.1647	69.8541	44.2586	51.3203	30.2832	50.3672	45.4186	73.6689	73.0027	55.2267	38.8602	67.1247	66.353	57.3412	63.8537
IGF1	2.09461	0.569705	1.58379	0.579995	0.892197	0.919482	0.987545	6.33374	1.04571	3.47833	3.34269	1.07159	1.57296	1.79555	0.431034	0.570595	2.04534	1.23085	2.46565	8.65055	0.819967	0.959247	4.69727	1.72798	2.1841	4.62806	2.31437	1.03092	0.535731	0.921913	0.896277	1.20084	2.37316	3.40047	1.08275	2.01155	2.14802	1.70617	4.56527	1.43786	2.01452	0.512996	0.449118	0.796578	2.90361	0.35135	0.640103	0.502244	0.166793
IL11	0.0318954	0.224987	0.304281	0.108622	0.108777	0.234224	0.11346	0.0099207	0.185333	0.0938777	0.034779	0.142039	0.250364	0.0828717	0	0.240941	0.0302378	0.148626	0.259734	0	0.091749	0.241282	0.111206	0.00713753	0.151323	0.0150833	0.87636	0.156367	0.124772	0.195769	0.221057	0.124553	0.0652779	0.0145213	0.0851493	0.110233	0.249811	0.276033	0.017423	0.119109	0.261841	0.126792	0.343527	0.210375	0	0.254126	0.153003	0.0561124	0.189375
IL17B	2.43877	2.26614	6.42543	2.00979	5.83809	2.68636	4.51919	0.0765843	16.7427	4.32939	0.214785	4.89711	4.45446	1.49882	0.216868	5.31422	1.00039	5.4878	8.18656	0.0514636	3.05925	3.21276	9.51129	0.157426	1.28498	0.282778	0.217453	2.65296	1.88511	1.90823	1.69808	3.98994	2.93098	0.213523	2.26709	6.33359	2.76428	3.95735	1.076	2.23302	1.81749	4.87996	7.71896	5.45208	0.605312	3.01108	6.84575	4.39357	3.99787
IL17D	1.34861	0.289	0.764521	0.460245	0.451202	0.574868	0.610827	0.808406	0.402973	0.541275	1.72555	2.99485	1.91172	0.740718	18.8231	0.275745	3.08301	0.503798	0.40359	1.10052	4.49316	1.40617	0.66463	2.99689	1.54287	1.03534	4.11585	1.69473	1.0618	0.537413	0.679282	0.419025	1.50482	1.86918	0.751961	0.606211	0.84641	0.348239	2.24269	0.85105	1.57041	2.03074	0.367723	0.349853	4.39923	0.588333	0.386053	0.572116	0.238912
IL19	0.00548851	0.00774308	0.0174534	0.00623049	0	0.00690941	0.234287	0	0.0159459	0	0	0.00771846	0	0	0	0.0740999	0	0.0056834	0	0	0	0.00922652	0	0	0.0234355	0	0	0.00620938	0	0	0.00787016	0.0061237	0	0	0.00627958	0.0284531	0.0174863	0	0.00599626	0	0.00795127	0	0	0	0	0	0	0	0.0558639
IL20	0.0453056	0.115049	0.739567	0.0617165	0.401732	0.285173	1.77469	0.0338203	0.0921392	0.101829	0.0237128	0	0.616421	0.0470858	0	3.12824	0.0309247	0.628652	0.0285629	0	0.0643954	0.167555	0	0	0.0773804	0.038565	0.0622409	0.0717586	1.24416	0.0861144	0.376798	0.212305	0.0158955	0	0.0933041	0.0281844	0.678411	0.268861	0.217786	0.182722	2.6779	0.637555	0.0975922	0.332977	0.0155931	0.261914	0.012419	0.0286936	0.0307424
IL24	1.43494	1.10329	0.80615	1.1484	1.18675	0.686444	1.144	0.214235	0.792106	0.414668	0.356746	3.79376	0.630763	0.395202	0.156835	1.23157	0.457084	1.08471	0.531488	0.0629838	0.66286	1.60413	0.366889	0.703232	0.776098	0.356257	0.896955	2.06174	1.39773	0.894949	7.37655	0.872552	0.755175	0.293986	0.623871	1.48035	0.828622	0.798331	0.219477	0.651069	0.530099	1.02676	1.70005	0.953219	0.259284	0.813596	0.275339	0.72704	1.30231
IL32	13.8492	5.10615	3.60672	3.95297	6.16431	3.01346	4.31081	5.16504	12.9194	8.0696	5.88806	9.19048	9.45624	3.84897	54.238	2.50042	5.20984	6.24039	3.58455	4.02018	7.06619	7.24475	11.2102	4.63984	4.16905	4.38781	12.1603	10.3921	2.50287	10.6231	19.0531	5.16877	9.27168	7.2843	4.19168	7.58332	4.97269	8.22196	4.36027	5.15031	8.33951	9.35565	7.66064	5.5846	6.70063	2.34149	3.75991	4.53038	5.59945
IL33	36.2106	11.8045	16.434	25.592	23.4008	21.0836	19.6897	13.8641	13.2836	17.2523	19.5213	15.6402	41.4385	17.111	5.05686	12.8844	37.0333	12.1944	12.8303	12.4626	45.3466	44.216	11.9311	20.758	20.6689	21.9334	39.7921	18.8883	65.0909	26.9841	29.9549	27.3741	42.1364	16.0289	34.9226	20.5687	41.9656	24.5508	24.32	33.3347	37.5229	24.8192	22.9355	17.3168	33.2903	27.1452	14.5311	25.2758	15.2087
IL34	5.98345	12.514	8.31729	4.02777	13.0548	12.3033	13.0046	1.66133	25.6509	11.9948	1.58915	13.1359	16.857	6.31108	1.18146	9.62713	3.18286	9.64613	13.2089	1.27687	8.90229	10.6358	7.95155	1.56237	5.70165	1.54258	2.90018	10.5101	5.32062	14.2616	19.9772	14.8843	7.21144	1.91646	8.02443	12.1966	11.0814	12.9595	3.7513	9.29629	8.88017	21.4981	24.5005	11.0272	3.02011	13.502	12.2271	10.6652	11.8653
INHA	0.137695	0.777029	0.377769	0.331009	0.621531	0.356881	0.223721	0.0831375	0.223556	0.130035	0.0953853	0.375889	0.279747	0.395644	0.068098	0.171841	0.165861	0.352267	0.689372	0.0622158	0.156242	0.326786	0.320055	0.0652516	0.737814	0.149383	0	0.15578	0.0760447	0.375265	0.394891	0.334372	0.390744	0.0811279	0.240945	0.310725	0.283861	0.285397	0.132735	0.444633	0.0469365	0.144892	0.294426	0.583847	0.139386	0.279148	0.333039	0.376187	0.467168
INHBA	1.74563	0.47871	2.50178	0.693351	0.925793	0.719068	0.653229	1.23836	0.273845	0.659766	0.419334	0.43212	2.88055	0.815027	0.175926	1.02167	2.26897	0.653941	0.888388	0.217202	1.56556	1.44824	1.16555	0.72896	1.30936	0.866514	0.906427	0.535314	0.884934	1.3392	5.70904	0.74036	0.878004	0.430847	1.00509	0.605909	2.78828	1.29351	1.24395	1.45511	2.82386	1.13307	0.677634	0.420976	0.791557	1.22184	0.643346	1.06656	0.847446
KL	2.62857	1.67192	1.34849	1.90958	1.56114	1.69342	1.01543	1.94963	0.567052	2.31288	1.60949	1.08211	2.5806	2.53047	0.578462	0.511848	3.93602	1.10214	1.55361	1.97531	1.57098	3.248	1.40343	3.29554	1.54287	2.31876	3.99694	1.93488	1.65117	2.5088	1.24029	2.10872	3.75396	3.19641	3.11668	1.75576	3.98374	1.47907	2.7797	2.95739	2.42071	1.45016	1.15315	1.69088	3.48442	2.07308	0.85448	1.69263	0.967087
LTB	1.32275	1.39632	1.19621	0.21001	1.08836	0.442499	2.53171	0.58693	2.3515	0.712814	1.79133	2.58864	2.12016	0.942121	0.0855461	0.642259	0.757666	0.756699	0.597747	0.294357	0.197214	1.85043	1.39754	0.782445	0.605617	0.170599	1.77272	12.7777	0.0434223	4.25263	29.8836	1.19718	2.36912	0.699083	0.317497	4.06643	0.545202	2.59028	0.424441	0.953383	1.31326	2.08492	1.99253	1.76496	1.78284	0.318792	1.5467	1.82586	4.3152
LTBP4	10.509	15.2113	16.6953	7.67746	20.8257	16.1595	15.4036	19.506	15.3576	26.093	26.9656	27.3213	38.0713	34.2836	11.9788	12.0781	32.2861	11.8704	15.6802	19.2375	29.8051	17.5779	10.7053	65.5519	30.5556	24.3921	26.2293	33.8906	4.17405	14.469	13.3541	11.946	25.5195	37.3976	10.9838	11.8946	13.7586	20.1514	31.832	21.7593	31.2025	51.175	13.1463	14.5983	53.4767	13.9981	11.0672	18.8436	8.75473
MDK	26.7423	48.5733	37.702	17.8872	34.7084	47.1692	149.066	7.38474	86.4301	19.3282	5.39771	35.2799	28.0427	22.209	1.00567	46.3715	8.20891	30.8052	18.5575	3.07923	26.6186	35.434	44.3201	4.86158	23.467	5.43955	12.4135	40.2616	31.9304	51.2328	40.6831	26.5549	16.1801	7.02372	18.2574	128.586	34.587	49.2219	9.59277	35.472	27.2954	46.1572	55.8156	40.4108	17.0685	22.5495	33.8079	44.5397	59.3063
NMB	11.6146	4.93923	2.38572	4.14785	7.96013	5.71919	9.08768	46.7348	7.16461	44.8767	39.0849	29.8733	8.66619	11.0459	0.852684	1.32639	22.8071	4.61805	15.131	45.0192	7.36285	6.77301	3.48763	33.2973	23.8476	40.6226	37.6575	66.0937	11.7556	11.0746	3.52616	4.16977	22.3613	23.7703	23.3506	6.66939	8.79732	12.9855	38.3862	18.9576	14.1091	6.22977	6.17244	6.10689	59.556	3.35169	3.46558	4.04754	5.34997
NOV	9.63583	3.41724	3.76689	2.56276	7.73554	6.68042	6.77581	2.96903	5.72559	6.43007	3.63516	6.56625	15.6332	3.79268	12.2591	3.66263	11.2944	2.90429	4.78056	4.21429	7.97079	7.29554	5.32153	18.2655	14.312	2.94658	19.7362	5.06009	25.8895	8.75882	18.7453	5.79037	9.35105	9.54789	13.6015	8.53668	17.2325	6.01894	3.08738	6.79602	30.4201	13.2968	7.73074	2.73283	5.10994	8.12595	4.14984	5.01831	7.0647
NRG1	1.87011	2.87703	3.95399	5.39126	6.07439	5.36965	0.76795	0.0877191	3.85827	0.973948	0.0984054	0.736801	1.15441	1.34827	0.00316143	8.32096	0.454874	1.95338	5.47228	0.0178803	3.93216	4.45648	3.15816	0.00504882	0.503089	0.816207	0.18511	0.564384	2.32415	1.29694	1.77216	4.15769	1.38305	0.0273916	3.31416	2.40032	1.03828	3.29378	0.70523	2.15548	1.59431	2.3558	3.07123	5.72747	0.002157	8.15744	4.38069	4.43358	7.88217
NRG2	1.38846	1.56439	9.65973	1.06266	2.11052	2.74843	1.6525	1.08162	4.74125	1.68947	1.15091	1.42247	1.67674	1.90009	0.240336	4.18048	0.725456	2.40712	6.03541	1.01343	0.921691	1.65288	3.27843	1.20207	1.05517	1.43948	0.962369	0.895586	0.468195	1.26881	1.02701	1.09001	1.3942	0.863829	1.22558	3.76183	0.562961	4.70707	0.669226	1.23525	1.35161	0.992756	2.17802	3.84494	1.25416	3.10818	2.04939	3.67396	3.9274
NTF4	0.571275	3.48021	2.27907	1.9573	2.01915	2.47133	2.07998	0	2.90454	0.875456	0.0679552	1.46069	1.46757	1.66242	1.65484	1.07177	0.218603	2.39313	2.97951	0	0.891075	1.52783	1.78658	0	0.36959	0.309451	0	0.981212	1.25554	1.8262	1.05003	1.53553	0.669624	0	1.41418	3.95772	0.711482	2.78341	0.107803	1.14037	0.910374	1.57934	4.41888	3.16366	0.00893725	2.1305	3.38104	3.25627	2.77516
OGN	44.2595	11.9006	63.7421	29.6739	30.7955	29.4843	16.9516	27.9384	9.20438	31.3752	28.6097	31.4456	71.2506	29.62	8.742	16.6117	110.085	29.2244	18.3763	18.4988	166.139	74.4029	36.7698	15.9817	30.6759	49.1675	99.37	41.3999	68.4896	37.6107	21.764	27.9108	51.8414	31.3313	21.9832	17.1287	97.0396	39.9692	90.4442	49.0381	77.2813	64.7749	3.07949	17.6451	35.8681	24.6406	5.14495	21.2697	3.40883
OSM	0.342544	0.08528	0.242064	0.114368	0.710098	0.0676429	0.118056	0.282029	0.107326	0.312706	0.676717	0.4156	3.25468	0.265257	0.451753	0.29147	0.23687	0.646818	0.0741028	0.206366	0.040914	0.564546	0.60886	0.441889	0.487544	0.133402	1.49019	0.334343	0.748824	0.375014	0.886059	0.0749386	0.223867	0.183475	0.130638	0.654604	0.684761	0.29894	0.110068	0.647115	1.36225	0.672836	0.343615	0.0664513	0.312077	0.0597365	0.110467	0.141794	0.717814
PDGFA	11.411	18.656	16.7185	22.5679	14.7337	13.6719	9.01847	1.11712	17.9527	4.70621	1.37406	11.641	11.8426	17.7322	2.35243	8.09813	4.02755	22.166	18.934	1.17859	8.54644	10.8909	22.9298	2.3285	3.13532	3.66868	5.28423	3.93949	8.30957	12.284	6.89133	17.4487	7.9417	1.9373	13.6584	16.2005	5.32633	18.1613	3.46047	8.03588	10.9118	8.61949	25.1071	15.137	2.8549	5.60531	25.5505	25.805	24.7772
PDGFD	23.7112	18.787	29.2405	27.3134	22.2029	16.5799	17.4588	14.01	9.75215	16.1105	15.8613	12.034	24.1126	25.3209	4.07713	9.9212	17.6222	25.7457	23.4912	13.6851	32.0072	23.3487	19.5111	5.0588	16.8031	19.341	19.3371	11.3154	35.6429	15.2782	18.3413	27.6251	26.0322	6.57352	23.6291	13.5311	31.4358	29.6586	29.9701	26.9777	39.0665	25.2606	27.8179	19.5932	6.29476	23.3931	11.5003	18.9366	10.1857
PDGFRL	21.1479	9.42945	27.8647	7.93536	24.8151	9.24525	15.3993	19.2769	8.18533	25.2365	23.2063	39.6535	43.8165	27.4307	8.76116	15.8013	51.2015	16.9551	13.9346	15.0115	59.8098	25.4246	16.8647	34.1401	23.5732	21.2726	63.1101	27.4663	9.00607	26.2153	10.4294	13.4286	32.9472	18.505	9.13755	25.4344	28.5196	27.9384	46.6078	21.2093	38.5014	46.652	2.73764	9.92169	30.4391	14.619	6.17989	11.7649	3.34953
PNOC	0.253788	0.27324	0.0991106	0.288097	0.307491	0.0420382	0.192855	0.00623193	0.126123	0.0536105	0.0262168	0.206627	0.230666	0.347053	0.0112301	0.0322027	0.098772	0.366536	0.126316	0.00732861	0.176293	0.291907	0.170761	0	0.0475287	0.227399	0.041288	0.649801	0.0235136	0.19835	2.35587	0.156483	0.210888	0.0182439	0.129901	0.228511	0.095751	0.148626	0.0656683	0.134678	0.0387017	0.159295	0.0539488	0.151031	0.0229863	0.133648	0.137304	0.169192	0.362546
PRLH	0	0	0.0570101	0	0	0.067707	0	0	0	0	0	0	0	0	0	0.103732	0	0	0	0.0590175	0	0	0.125013	0	0	0	0	0	0	0.0638927	0	0	0	0	0	0.0557638	0.0428381	0	0	0	0	0.192421	0	0.0760163	0	0	0.0737143	0.0567713	0
PTN	17.3983	44.9273	139.006	27.5319	286.276	231.035	169.596	1.26071	293.894	60.3481	2.2234	22.4155	162.91	14.4035	0.655068	246.81	11.0044	40.5382	126.018	0.927743	249.69	193.753	55.2946	0.389522	131.861	10.8774	5.81318	88.3174	347.021	51.0363	122.374	115.176	79.4721	1.62271	143.827	85.8547	54.4072	59.4421	4.93533	198.006	104.843	314.205	346.228	132.418	1.42641	328.009	56.0869	58.7169	172.853
PYY	0.144272	0.118729	0.395064	0.095536	0.0410027	0.514596	1.73586	0.0112185	0.349297	0.135111	0	0.169074	0.113247	0.199921	0.020216	0.452169	0.0273548	0.211643	0.303188	0	0.0122061	0.0606325	0.0838358	0.0161425	0.855596	0	0.00825839	0.163221	0.0141095	0.185673	0.137918	0.160969	0.0421815	0	0.0137555	0.673131	0.04788	0.178368	0	0.175098	0.104504	0.0716894	0.307537	0.492786	0	0.147027	0.346039	0.177669	0.285532
RABEP2	1.928	5.20306	4.61804	1.02372	3.9558	4.25531	5.45415	0.983671	9.88386	3.21509	1.33462	5.99555	4.12357	2.63397	0.818322	6.76533	1.76884	3.08485	4.97966	1.32739	1.23443	3.93635	5.40659	2.67218	3.41688	0.754399	2.67005	5.79432	0.562012	4.17443	5.94839	3.13301	2.97578	1.74706	1.61884	6.50641	1.49106	4.83842	1.32837	4.60557	2.52281	4.28703	4.40846	5.74008	3.05564	4.1797	6.71275	6.01672	7.38003
RETN	0.0546107	0	0.0868307	0	0.0465617	0.0343743	0	0	0.0396654	0.219185	0.0357287	0.307195	2.62916	0.0283783	0.0459138	0	0.186381	0	0.0430366	0.0299627	0.360384	0.183608	0.126936	0.366622	0.0388638	0	0.675218	0.432484	0	0	0.19577	0.0304654	0.191601	0.198905	0.0937227	0.0849325	0.0217486	0	0.20882	0.0611807	0.15823	0	0	0.115779	0.0469893	0	0	0.0288224	0
RLN2	0.588838	0.940438	0.353302	0.491872	0.625194	1.00702	0.488206	0.165873	0.516457	0.338896	0.029075	0.249986	0.5	0.415681	0.0280225	0.857127	0.214868	0.563728	0.245154	0.0487656	0.451186	0.896489	0.284066	0.104421	0.490207	0.252191	0.221316	0.289096	2.95976	1.05588	0.366418	0.954488	0.331329	0.161863	0.203384	1.08281	1.20349	0.700528	0.194208	1.48117	0.354099	0.71548	0.658136	0.518195	0.114716	0.506416	0.517731	0.914738	1.16852
SCG2	0.135773	0.0957732	0.592284	0.0948483	0.20481	0.138054	0.288476	0.00487278	0.0455153	0.167674	0.040998	0.190938	0.355252	0.0325635	0.0439043	0.342441	0.124757	0.275782	0.13169	0.00573028	0.148448	1.5977	0.230623	0.210346	0.289871	0.0518596	1.45634	0.289489	0.0428993	0.310181	1.49762	0.326279	0.595451	0.0760799	0.0238989	3.14574	0.844347	0.910324	0.114103	1.28122	0.680873	0.18683	0.00703048	0.154996	0.00898656	0.179973	0.0143145	0.159853	0.0442932
SCGB3A1	20.8786	33.7407	16.0113	16.2517	6.38214	27.5092	9.6929	0.344539	39.4722	24.9508	1.64707	23.8857	5.90203	5.35497	0.070553	45.3507	2.06209	14.9115	4.57633	0.0184168	3.37381	21.1322	326.054	0.0901387	1.26606	6.76221	0.253628	27.4374	4.29385	8.11482	3.20082	4.11967	9.05351	0.168105	9.98528	57.39	4.22426	33.6148	1.9803	20.5136	8.58296	16.5527	12.1338	72.6823	0.895352	6.86644	198.976	29.5146	47.2338
SCT	0.116383	0.328383	0.246732	0.044039	0.132306	0.0488378	0.0487063	0.0361997	0.0563552	0.062282	0	0.491008	0.16241	0.161275	2.08745	0	0	0.080344	0.12229	0	0	0.130432	0.270519	0.0520884	0.110433	0	0	0.0877797	0	0.092173	0.333772	0.0865684	0	0.0706494	0	0.160892	0.0308996	0	0	0.0434617	0.056202	0	0.261146	0.219326	0.133522	0.172518	0.106342	0.0818996	0.197432
SECTM1	5.59128	3.18634	2.71939	1.58407	5.02885	3.3564	6.16493	1.14101	8.61681	4.0417	4.12238	10.7897	7.40263	3.39389	0.30237	1.96533	3.71503	3.25739	3.86211	1.78906	4.20144	3.74843	2.98713	7.35274	4.28618	1.38782	5.25702	6.1846	2.72376	6.7277	8.89078	4.02337	4.85377	2.68969	1.816	8.68581	5.31661	4.30412	3.78771	4.66304	5.22411	9.21853	2.95034	2.71102	3.89499	1.70595	1.73509	3.1433	2.83899
SPP1	20.3897	1.26868	33.2593	2.11114	15.2095	22.7188	16.1752	2.40322	24.9449	22.6774	31.2424	330.753	20.0402	1.86286	0.282881	56.7349	11.1143	9.92021	31.7414	2.16826	14.3719	107.354	55.0008	75.6167	12.6514	2.56028	27.3895	98.0431	5.79375	12.8488	42.7553	10.1495	17.7287	3.2531	9.02904	37.2449	8.42469	11.9803	8.50137	27.3181	15.4119	18.9466	25.1529	15.1053	4.50579	17.506	8.95472	16.602	59.3605
TAC1	0.233137	0.275855	1.40303	1.76721	1.24395	2.48995	0.42489	0.0561402	2.28328	0.217327	0.0393622	0.370163	0.92878	0.406434	0	1.10237	0.54756	6.68174	1.0668	0	0.939138	0.379275	6.45034	0.0504882	0.449569	0.138702	0.103317	0.0510498	0.132388	0.553917	0.226463	0.637708	0.897117	0.0616311	0.146276	2.34704	1.16806	2.10597	0.312218	1.58396	1.37278	1.36325	0.151874	0.53147	0.142362	1.47988	0.628758	0.412795	0.140335
THPO	0.370725	0.146443	0.188625	0.210421	0.177007	0.317357	0.16756	0.560405	0.333894	0.571368	0.523897	0.855012	0.318162	0.27741	0.561035	0.293157	0.59045	0.268722	0.233724	0.691568	0.398964	0.436248	0.344683	0.895974	0.517102	0.462833	0.794513	0.30198	0.321954	0.396368	0.212638	0.198542	0.663351	0.904681	0.262978	0.661128	0.401582	0.343755	0.656135	0.423632	0.50485	0.318323	0.129768	0.293427	0.714532	0.173103	0.0914597	0.172182	0.163513
TNFSF13B	7.63085	1.03464	1.5154	2.60295	2.76234	0.818062	1.3753	1.39897	0.505705	1.76609	2.5023	4.11233	3.57545	2.39272	0.390244	0.944471	3.47984	1.00455	1.33148	1.5382	4.32132	5.23573	1.39177	3.37163	2.02158	2.09406	4.66774	3.91221	3.5244	4.43335	7.98031	1.82295	3.79852	2.26963	2.58098	4.673	3.56025	1.60107	1.94221	2.88603	2.54182	1.99277	1.13108	1.40393	1.15023	0.887572	0.865197	2.0284	1.67717
TOR2A	1.98723	2.88802	2.01125	1.74183	3.24189	2.58179	3.07759	1.05811	4.70799	1.55613	1.10181	4.89982	2.01717	2.20922	0.396451	3.27698	1.18359	1.81752	2.31813	1.26895	1.42862	3.22741	3.07069	1.8592	1.41688	1.45477	1.98971	2.92991	1.63822	2.55638	3.2252	2.15876	1.86779	1.25744	1.80265	3.68623	1.69907	2.69979	1.27566	2.05441	2.02772	1.86112	2.22699	2.23745	1.78396	1.8057	2.89806	2.37416	3.12987
TRH	0.0502484	1.53931	0.205444	0.13038	0	1.0573	0.37852	0	0.417108	0.0576219	0	0	0.127719	0.00746041	0.0120704	0.117682	0.0408317	0.401395	0.0339419	0.0157539	0.0583029	0.0241345	1.33482	0.0192764	0.214557	0.0101839	0.0986163	1.03139	0.0926675	0.00852764	0.0308798	0.881002	0.0314815	0	0.0574909	0.736826	0.280159	0.053249	0.00784243	0.667482	0.103994	0.0256821	0.444555	0.700057	0	0.0718242	0.0393541	0.0530402	0.0852409
TSLP	1.09757	1.26307	1.03689	1.46804	1.71893	1.19804	0.653611	1.03344	0.722537	0.622849	0.620455	0.755432	1.10013	1.00285	0.432117	0.709892	1.1845	1.09877	1.20728	0.462106	0.942622	1.38799	0.539522	0.52536	0.405883	2.30981	1.0728	0.525202	2.82521	1.02813	0.765524	1.00261	1.04996	0.881649	2.31425	0.814813	1.26245	1.14378	1.8693	1.17389	1.3883	0.40731	2.11158	1.11074	1.91162	1.34187	1.12255	1.56457	1.53565
UCN	0.267901	1.31023	1.09804	0.304119	1.03548	0.696999	0.896931	0.199986	0.726451	0.286732	0.163588	0.979546	0.654235	0.538294	0.540569	0.499478	0.101591	0.499345	0.478546	0.137188	0.235723	0.600478	0.249082	0.239803	0.508407	0.329395	0.147217	0.585971	0.0209601	0.912339	0.665865	0.458323	0.4543	0.195152	0.367818	1.09255	0.384088	0.927403	0.468297	0.800351	0.646853	0.489887	0.625173	1.21167	0.860584	0.496395	0.514053	0.904914	0.78774
VGF	0.0157531	0.0148161	0.0166982	0	0.0268625	0.0132209	0.0725191	0	0.122047	0.0252905	0	0.029538	0.0274787	0	0	0.0455745	0.00597375	0.00543748	0.00827628	0	0.0106623	0.0794457	0.0244108	0	0.0149476	0	0.0108208	0.0237628	0	0.0124761	0.0451777	0	0.023029	0.0191255	0.00600787	0.00544439	0.0292769	0.019476	0	0.00588276	0.0152144	0.0375733	0	0.0296868	0.108437	0.0116756	0.00719696	0.0110855	0.0356312
ACVR1C	5.14831	1.1045	0.147315	6.70324	1.52461	2.636	1.61689	25.6898	0.311802	11.7781	14.75	1.78938	1.2913	15.3922	0.132423	0.274001	11.308	3.38512	8.27745	30.8698	5.55137	0.929321	0.88655	9.44613	11.6442	39.3871	8.25014	3.81894	3.54469	3.90735	0.912274	2.10365	19.2182	21.0123	12.3001	0.313805	13.822	4.11512	35.1511	6.52195	4.44955	0.65375	1.03531	2.33312	11.7641	0.717594	0.114287	1.97553	0.859209
ACVRL1	10.959	4.59051	6.41146	3.66179	6.54783	4.99001	7.22964	9.29539	6.37606	11.9856	10.4138	18.4661	13.9258	11.3925	3.66417	3.46934	11.0667	5.25397	6.35849	12.7273	6.81012	10.2391	7.99545	22.3741	12.6949	7.72977	23.0863	14.3107	3.66989	6.73368	8.18848	6.61341	20.0748	13.0956	6.07264	9.50772	6.01141	9.58178	11.5388	10.3995	13.4807	12.394	2.96979	4.92549	27.639	5.76604	4.48288	5.48654	3.43139
ADCYAP1R1	2.48354	1.46893	1.58393	2.58336	1.94561	1.11455	1.36726	5.28063	1.25592	2.03529	4.54684	2.37028	2.04897	6.03054	0.501476	0.476996	2.60311	2.80845	1.74263	2.94645	2.79783	2.15911	3.65684	2.85184	2.13273	4.92685	2.68954	1.21324	0.380485	1.85663	3.05163	2.98893	2.55754	3.24924	1.98548	1.34891	2.36879	3.08333	4.92934	1.60187	1.14411	1.2789	0.763851	0.931155	2.6144	1.24767	1.30174	1.97875	0.817931
ADRB1	1.2442	1.43934	0.126609	0.355924	0.738328	0.306995	0.243685	3.94268	0.549449	1.47014	2.17503	1.67272	0.255227	1.15343	0.0502106	0.182376	4.6936	0.401973	1.68647	4.69112	0.773065	0.510343	0.104111	3.27428	1.48753	3.12783	2.14344	1.83553	0.881934	0.608962	0.278319	0.316507	1.80722	4.78997	2.32889	0.774008	1.83929	0.553767	5.62206	1.23777	0.641684	0.255212	0.696828	0.379841	3.61421	0.154921	0.115959	0.425516	0.388358
ADRB2	4.91163	3.43843	2.83265	3.33788	3.29813	3.00074	3.39134	8.92765	0.886625	8.16999	5.8926	6.97099	4.28593	5.94039	3.55388	1.82541	5.39529	2.28466	3.50343	9.43073	3.09409	4.47847	1.29406	11.5172	5.05376	11.3269	6.70512	4.27836	10.812	3.23832	3.34703	2.07515	6.8257	6.7254	4.63342	3.36079	4.54604	3.02856	6.94743	8.17295	6.58381	4.32793	2.62059	4.15005	13.2143	5.11202	1.28305	2.41596	2.71438
ANGPT1	6.24085	1.85194	0.808698	3.29466	1.33832	2.09641	0.760278	9.18775	0.489029	8.46186	12.6649	2.25785	2.56014	3.09915	4.34261	1.01427	10.9092	0.851896	2.20714	11.9237	2.21448	2.56505	1.3381	8.94644	8.16533	9.12234	6.36801	4.30213	1.76031	3.20883	1.82521	1.77578	3.6272	15.0637	7.96994	0.660904	3.22396	2.34945	6.70721	4.35389	3.57838	0.629525	1.19608	1.71177	6.16689	1.78272	0.799937	1.52652	0.834653
ANGPTL1	8.3991	1.36564	5.54172	3.4008	4.53932	5.35241	3.37881	13.2958	1.29102	10.9723	15.6745	8.96579	12.4936	10.4897	12.7865	2.22912	16.5043	2.23806	2.66997	17.1694	12.1279	7.3578	5.7705	13.0756	12.6612	9.03303	19.5034	6.17906	5.05334	5.84395	5.93512	4.49237	6.7815	10.6151	6.87429	3.39597	16.1846	3.42783	12.4536	5.97388	12.5789	27.8054	0.713404	3.44399	8.09934	3.46508	1.12658	3.10499	0.721963
ANGPTL2	64.5462	23.3742	50.0399	21.2244	36.8006	41.1269	30.7437	111.198	12.7819	69.722	137.309	87.9317	66.6066	52.303	33.9802	15.5939	116.971	35.5721	44.689	98.4356	63.8665	40.956	21.2922	186.834	71.8468	80.9843	147.443	95.5229	49.3258	39.4519	19.957	22.7508	77.4978	120.203	65.9753	55.1049	40.6889	56.4075	107.266	64.7159	81.2166	51.4566	40.7189	41.2048	89.4443	32.4312	15.6826	27.5088	12.4304
ANGPTL4	36.498	17.7473	2.81366	11.3581	14.4765	5.24285	17.7188	16.8576	3.0831	28.6639	48.7005	83.5714	27.6074	19.525	8.10909	7.08352	71.5562	17.89	18.538	33.509	10.1523	15.2331	2.11424	100.361	24.2233	21.913	48.1763	52.7409	3.98791	8.16199	7.3992	7.74867	41.1607	66.0089	22.1164	20.9852	5.80044	10.7151	61.6743	20.2138	21.5064	31.9285	29.1513	13.0096	68.1152	18.3293	10.9613	8.20636	24.6592
ANGPTL6	0.123694	0.0918447	0.0552065	0.00739032	0.0777095	0.106543	0.155298	0.0303739	0.104028	0.0522586	0.0170371	0.411988	0.109018	0.0676602	0.0109469	0.10045	0.0222187	0.107862	0.102609	0.0214314	0.0859239	0.153217	0.075661	0.122375	0.0926602	0.00923602	0.07155	0.316707	0.00764021	0.085073	0.513437	0.101691	0.0571027	0.0414956	0.0670369	0.107999	0.0259268	0.0724391	0.0568999	0.0875212	0.0377257	0.100931	0.0525884	0.119618	0.0672199	0.0796144	0.16061	0.0481034	0.209833
AVPR1A	7.51966	1.57214	2.91523	1.52993	1.27496	2.15227	1.23766	9.35857	0.871668	4.72495	4.50531	1.89865	7.20969	3.00677	2.45438	1.49716	3.84931	1.03559	1.97032	5.19964	2.59395	3.20628	2.00356	3.52321	4.32449	9.23917	5.58398	2.06891	2.14334	3.2106	2.60178	1.602	5.39267	4.80251	3.89581	1.4097	3.45555	1.81932	4.1805	2.31282	12.1874	3.80518	1.42015	2.03611	6.12603	1.89011	1.11287	1.71416	0.577627
AVPR2	3.81859	2.6487	1.47741	0.852513	1.56277	1.85076	1.47023	2.86836	2.42224	3.02438	3.62252	6.38142	4.40286	2.97647	0.96849	0.478719	3.23639	0.632668	2.84879	2.75856	1.36336	3.17754	0.784033	5.16984	2.63598	2.44687	7.6635	4.80974	0.814119	2.47231	1.03124	1.08643	6.0512	2.90913	2.57041	2.24355	1.27742	4.41417	3.59474	2.93755	4.56393	1.59388	2.0821	1.16938	14.1174	1.39387	1.86668	1.69291	2.00812
BMPR1B	0.418405	5.85199	0.469737	0.556683	0.479485	0.71929	1.51661	0.0839613	0.127442	0.18057	0.117737	0.246749	0.489699	3.62371	0.607092	0.817825	1.15159	0.715115	0.177274	0.0765208	1.26066	4.2996	0.162089	0.283911	12.1633	0.162759	0.299764	6.05696	2.46306	0.967379	0.748343	0.358905	0.682686	0.137236	1.11699	5.68854	4.23201	0.613236	0.525925	4.10527	1.17645	2.25613	1.17203	1.28447	0.0387111	1.31045	0.141823	3.12005	0.961634
CNTFR	10.7281	4.50729	5.04778	4.63467	9.84081	3.90346	10.5726	41.5172	5.17849	27.4385	36.3746	26.8916	6.70868	18.4546	8.70861	0.908083	18.1348	7.45943	9.36082	38.6526	10.4001	6.10576	7.06656	25.7472	14.762	38.8466	19.2476	17.3877	9.12495	8.84534	1.466	3.8348	40.2	38.0577	16.4454	4.8119	10.4039	10.5651	41.2976	16.7283	14.3142	4.03473	4.65446	4.78179	45.7437	4.15011	4.92276	8.00145	3.54853
CRIM1	75.8364	55.8667	71.6544	60.3225	56.3248	62.6064	31.8234	30.5871	26.2445	61.2769	50.5691	22.2106	57.5035	62.23	11.9879	50.5215	84.1286	59.5158	66.5967	33.1061	51.7553	47.4733	35.3018	71.8111	69.8951	58.8474	38.8319	37.1526	67.0861	55.8584	38.1444	70.6307	62.6482	84.0665	93.0214	33.4162	69.2784	58.0612	49.7932	75.461	83.074	43.6022	63.0137	67.9031	49.0542	69.6267	46.0583	66.5479	46.9997
CSF3R	1.60197	2.2434	2.06056	0.862421	3.55612	3.44176	0.835387	0.279789	2.42256	0.846471	2.645	5.66647	2.12444	1.07493	0.262006	2.55366	1.22264	1.42686	0.841637	0.597051	1.08598	3.59918	1.20596	2.34318	2.31846	0.348913	2.33733	2.59946	0.379565	3.37994	1.90823	3.23268	0.948574	0.998537	1.21999	3.22587	1.87705	1.43701	0.585232	2.92889	1.84492	2.1656	0.877665	2.02849	0.194223	1.59558	0.937359	0.921057	2.22607
EGFR	16.0841	17.6806	19.6573	22.5353	13.8443	16.9134	9.71167	18.8509	7.18035	19.4254	23.996	7.53043	14.4661	23.5895	3.441	11.2205	22.8804	22.3272	20.5246	15.4856	18.4905	10.0938	19.9304	21.3722	17.808	23.8505	9.10751	11.1594	14.6551	14.0059	11.3386	17.9578	14.9092	18.4591	25.2823	8.95724	21.6308	18.0081	22.8454	17.9382	16.2372	14.2613	16.1278	18.9163	8.83041	17.583	16.33	18.2104	12.3658
ESR1	9.74193	19.8138	13.3092	7.70612	37.1824	10.2508	22.5483	2.51975	3.92271	2.94035	2.28744	5.52191	10.6212	20.859	1.15355	17.5596	5.72567	12.6219	8.66	1.86455	14.9855	33.8166	5.56473	1.32747	44.6577	3.68172	0.9668	19.6998	27.6059	34.0398	6.84197	13.0233	8.31278	3.06596	17.9975	25.0653	8.85307	11.2116	7.3595	25.5651	12.3655	19.5148	18.6053	18.5119	1.74442	17.1694	8.46876	39.1401	28.9839
FGFR3	0.842997	2.71836	0.516841	0.360111	1.01176	2.55141	2.81743	0.293267	1.79635	0.405542	0.46505	0.520465	1.10055	1.31265	0.0666766	3.37925	0.404327	1.14059	0.574059	0.609172	0.196817	1.08136	0.266266	0.216909	13.5244	0.183352	0.899856	1.62165	0.768704	0.928175	1.53311	1.49768	0.752295	0.310249	1.08884	3.95297	0.634011	0.82797	0.465305	6.86758	1.92338	1.56229	1.40779	1.2413	0.803698	1.15272	0.531402	2.34395	1.55462
FGFR4	0.911497	1.09511	1.98224	0.567428	4.8735	2.66139	1.52092	0.0603603	13.4887	1.52472	0.0615579	1.72427	0.187718	1.17039	1.01602	3.69181	0.1338	0.350143	8.45297	0.0290382	0.364191	2.35774	0.840632	0.0118437	0.242728	0.200228	0.0383744	0.871544	0.15183	3.91914	0.366811	0.347744	1.13735	0.072288	0.666093	1.50295	1.85248	2.01754	0.491486	1.23527	0.690066	0.396238	1.03318	0.822846	0.0354196	4.91638	0.842258	5.31969	5.72613
FLT3	0.416506	0.337147	3.65139	0.693718	0.844133	1.30224	0.570071	0.0860124	2.12757	0.548094	0.2993	0.585731	0.24297	0.386747	0.0545357	6.1401	0.357316	0.855521	2.82496	0.0711786	0.374335	1.49217	1.26967	0.123765	0.481055	0.208267	0.31893	0.575496	0.132217	0.563743	1.55675	1.57316	0.215603	0.177193	0.242175	0.976959	0.339903	1.47518	0.126814	0.807014	0.44513	0.0895713	0.0597515	0.921626	0.0528757	0.573116	1.3008	0.2955	0.341696
FLT4	3.02358	3.16808	3.3206	1.94832	3.68706	2.56246	2.44883	3.18355	2.58874	5.2739	2.37589	3.30464	5.93445	5.29287	0.925122	1.50971	2.91236	2.44994	2.86943	2.33745	3.59245	4.77272	2.58747	4.75101	3.11174	3.36336	3.1181	4.85612	1.09558	4.95435	2.94407	2.29792	6.74479	2.277	1.94899	2.30005	2.76855	3.17395	2.84416	5.54552	5.00538	4.45133	1.08623	2.78399	5.29155	2.24333	1.91264	2.89018	1.36052
GHR	17.5412	9.12471	6.87868	18.7201	9.846	8.90758	7.38411	61.8859	3.35134	34.6239	43.4174	8.10488	7.39202	29.3906	10.8829	7.2606	38.1465	12.6098	19.3557	55.7296	14.1035	7.00182	10.7748	37.2115	28.8676	107.698	22.6034	14.7684	13.0407	9.77865	3.90261	10.984	39.3029	70.4318	33.4441	3.88642	20.6253	13.8908	71.305	15.2717	13.7797	5.19519	9.01135	10.6687	33.4726	9.20136	7.58109	9.50048	6.60288
IL11RA	4.63762	7.34936	8.8979	4.40413	7.2109	5.85917	4.92932	4.52597	6.02699	7.05045	5.04603	10.9633	6.62476	6.73051	3.6559	3.43036	3.68747	5.66292	7.22564	5.669	5.36991	6.62811	5.4323	4.97253	4.76011	3.36751	8.09299	5.28435	2.72715	5.63177	5.99696	6.09051	5.26332	5.26416	4.50349	6.0217	4.3823	8.13808	5.23373	4.99817	4.4646	6.13332	7.78331	7.0481	6.21302	6.67117	6.77088	7.07447	5.13766
IL17RD	12.0929	14.1378	26.2761	22.5649	13.5077	15.9004	8.45739	1.78068	9.8179	6.1822	1.85576	3.8699	8.09935	15.0036	0.727916	13.2859	6.545	20.7557	16.3214	1.49597	12.8353	11.0495	18.5055	3.3718	4.26335	6.37538	2.64817	3.84245	5.71478	11.6915	6.79735	15.3648	6.55465	1.70383	12.356	10.9046	9.94661	17.1991	5.34924	7.02762	9.43407	7.43311	11.0564	28.078	1.72761	12.9786	18.9538	18.6432	16.4105
IL21R	0.397368	0.161218	0.0853431	0.114983	0.292299	0.0686606	0.205427	0.0315051	0.0830021	0.0667136	0.0747644	0.164358	0.163093	0.0674807	0.0174686	0.055101	0.109322	0.0860608	0.0614022	0.0398992	0.0817408	0.296889	0.138847	0.0557947	0.0184829	0.0331615	0.110608	0.39667	0.0213358	0.219061	3.97743	0.173865	0.259698	0.0756764	0.0832024	0.317752	0.109638	0.187842	0.051074	0.171669	0.109114	0.0929196	0.160843	0.150503	0.0312861	0.0346487	0.0462754	0.142557	0.299596
IL22RA1	0.882983	0.902054	0.93596	0.881378	0.822068	1.50127	1.14044	0.10891	0.619223	0.741374	0.219123	0.863505	0.791355	0.759458	0.00426647	0.6998	0.265561	0.425639	1.05577	0.0612533	0.865541	0.759236	0.613357	0.408814	0.585041	0.352768	0.132459	0.614301	1.4829	0.651075	0.851369	0.679429	0.49852	0.0600696	0.841875	1.86783	0.638621	0.96932	0.182954	0.523032	0.852792	1.13169	2.12474	1.39144	0.0960611	1.58531	0.702473	1.34449	0.964155
IL22RA2	0.892018	1.3345	1.05983	2.10311	0.77726	0.709556	0.486122	0.60826	1.64467	0.401296	0.0128263	0.641006	0.964366	2.02223	0	0.212691	0.167273	1.86769	0.633442	0	0.532429	0.21422	3.13287	0	0.069759	0.257273	0	0.227342	0.454401	0.605536	1.89053	5.22781	0.0558865	0	0.594408	0.264248	0.527011	0.099982	0.112447	0.115308	0.0852051	0.140281	1.16793	1.524	0	0.23975	3.11692	0.776025	0.299316
IL2RB	4.12973	4.30887	2.04305	4.30049	3.91514	1.15615	1.65369	0.53842	2.58045	1.44046	1.34796	2.35788	1.96032	1.82104	0.213352	1.9257	1.30599	2.51514	1.50463	0.540349	1.94761	7.10484	1.6291	1.65089	0.610575	0.82718	2.10004	3.55793	1.58479	4.51479	15.5473	3.09425	2.85384	1.8678	1.9598	3.88087	2.10785	4.01697	1.28389	5.37453	2.2058	4.1504	2.38338	2.04953	0.291134	0.765758	1.50302	1.85273	3.46438
IL2RG	13.2882	5.4941	3.62088	8.6081	7.60575	2.48043	3.90762	1.1809	5.2686	3.40276	4.4024	13.4131	5.8365	6.77418	0.661757	2.38132	4.42452	5.6308	2.70819	1.14597	6.31456	13.6382	4.83092	4.19277	2.34309	3.35	6.91555	10.325	5.17408	10.3773	44.6152	5.62506	6.27668	2.77314	4.47334	6.19269	5.58087	5.41897	2.51232	4.27068	4.36738	5.11059	4.9729	4.19544	2.04506	3.16279	2.66525	4.38225	7.18236
KDR	17.7445	10.3277	13.858	12.0829	8.99394	9.63557	6.84978	28.7907	7.0489	13.7376	24.1535	9.82592	12.263	20.3703	4.91693	10.1967	20.4732	10.0471	12.3641	17.47	16.2648	13.8584	12.0276	20.0939	11.8562	20.7456	16.5425	9.8348	7.23878	15.7816	10.3996	10.671	22.1623	25.7275	16.8916	9.16839	17.6803	15.4145	19.2374	17.7826	14.1285	6.59845	6.04415	11.8986	19.82	10.7211	13.6463	9.54956	6.08035
LEPR	10.3363	3.56935	5.39282	4.87801	9.05663	3.89406	2.31102	6.89605	1.08663	6.26918	5.71421	3.50181	17.7724	6.31669	0.637301	2.86015	17.5964	2.87205	3.58025	4.13291	9.10058	11.0591	2.33084	12.5302	8.59201	8.81223	13.7153	5.80525	7.34094	8.06295	3.78193	4.86268	10.7629	7.73115	9.05849	3.49331	13.4786	5.15284	9.8463	9.37631	12.6549	13.9441	1.79558	2.54163	5.99794	9.22687	2.38422	5.46778	2.2519
LGR4	12.3601	15.4753	25.636	22.3876	16.2763	12.5715	10.0633	14.714	6.35047	11.4336	8.70046	4.47855	12.1345	13.9304	4.16685	11.3817	13.0804	19.9672	18.3798	12.1671	14.8679	12.7477	16.9389	13.1646	12.61	15.0697	8.50555	4.52773	14.1034	22.6543	10.103	17.2413	8.37803	11.8256	21.1137	8.65883	12.8201	18.0334	10.8268	10.1137	11.904	9.37193	18.736	19.8436	4.14306	15.5762	21.0966	15.7701	13.4984
LGR6	5.6603	11.5651	9.72726	10.4946	12.8113	16.5447	7.52269	0.18791	11.3864	3.74532	0.231071	4.8623	3.93966	10.5612	0.0677235	5.29419	1.33933	8.84166	8.20842	0.159784	5.44469	9.45281	13.1855	0.349423	0.612934	1.38453	0.151096	3.03538	3.02143	6.08384	2.84322	8.16816	2.3506	0.203115	4.12955	9.79408	2.95378	13.5823	0.534791	4.29346	4.43445	3.90905	23.0325	13.465	0.325224	11.4421	20.3905	13.6337	13.98
LIFR	29.3598	15.1569	18.8666	26.6011	11.5244	21.1561	6.97344	9.64311	3.73612	29.4624	20.5208	5.9866	18.052	28.1788	6.1499	14.6171	26.3617	13.9371	23.3033	10.4366	20.0156	15.6867	10.5152	16.6877	30.0378	28.0016	8.55867	11.7946	16.5861	21.305	12.4333	20.2004	18.2423	16.7255	24.4131	14.8395	22.6433	15.3298	22.8566	18.7467	20.1382	9.15446	9.70617	26.4995	14.6722	34.4832	9.9911	17.8528	7.40628
MET	13.6965	17.8543	14.3451	14.0368	11.8704	18.0372	7.05564	11.6379	8.48893	12.0113	7.35345	3.52888	12.0442	10.3311	6.31391	11.7571	12.564	10.705	9.3503	6.97686	14.9007	11.414	4.64644	7.34786	7.36994	21.3543	9.76701	7.28673	17.712	14.7996	14.9309	12.8555	13.659	6.77758	17.3877	9.43657	20.2166	13.9607	8.6542	14.5533	18.6149	16.1488	16.5631	13.491	8.25821	23.0356	5.05107	13.8038	10.2075
NGFR	15.4955	9.38335	18.1442	11.1779	11.3301	24.1631	25.0602	0.590622	38.4191	12.0732	1.74597	16.922	18.7421	9.47273	0.555169	16.0352	4.77195	16.9456	22.2874	1.36284	8.39913	17.0994	32.725	3.07786	10.5088	3.10166	7.18443	9.76981	5.06725	13.1852	30.1575	13.6967	15.5661	2.80384	8.57672	34.1435	13.6556	25.1832	4.73593	13.6225	14.7211	21.5519	40.7467	17.7955	3.30895	19.2619	24.7126	20.6215	20.1806
NPR1	18.1862	6.99475	6.27838	3.96272	7.03181	8.19597	6.63105	70.8666	7.55284	44.8067	50.5676	31.3783	14.7684	24.2248	3.6006	2.40024	36.2741	6.6535	21.8646	74.1349	12.9978	11.3501	8.34484	50.5664	31.1681	41.0928	41.9563	31.7838	3.76365	14.2042	5.09918	6.32984	48.1908	49.1828	20.4795	8.70704	10.7577	19.2685	47.2346	22.1165	20.5411	13.3758	5.41037	9.74734	79.7502	5.57836	4.44213	5.9585	4.31855
NPR3	6.70218	1.46185	0.475958	1.13217	1.95836	1.29902	0.563741	3.24446	0.347042	16.5962	14.6922	5.78427	2.42955	1.21601	0.169396	0.488526	26.5675	0.362134	1.06383	16.6545	0.914659	1.90642	0.177293	12.3302	17.069	3.52608	8.58566	10.733	2.91177	3.99551	1.02564	1.19144	4.25403	35.8904	15.9192	1.1221	1.89481	2.03105	7.5612	8.87895	3.29211	1.07269	0.682018	1.56218	9.85204	0.977585	0.280093	0.856783	0.895987
NR2F6	8.02793	12.7554	7.95278	6.81232	12.7394	12.1101	17.3202	8.61983	26.4762	11.7213	7.90785	14.6997	10.1846	8.84519	7.9673	19.9146	5.64993	9.9668	10.9972	11.6331	6.7929	11.2744	12.8264	6.30491	17.0071	5.89408	7.89801	17.2943	6.20204	10.9362	8.40729	9.31222	8.2655	8.61922	8.34726	18.0114	7.72546	12.1818	7.63443	11.1872	8.71686	13.978	19.2659	13.5663	13.7421	9.06066	17.977	13.5482	14.8966
NR3C1	23.9051	17.7578	20.6725	33.2101	18.6633	17.7792	11.2844	36.0277	6.43157	18.6522	22.7274	9.19357	16.6767	26.5273	16.433	11.0442	29.1818	19.9897	24.2773	23.5289	22.1197	17.1393	11.0395	25.9069	16.0889	37.0393	21.3002	10.5573	15.0627	19.8487	15.8628	21.5418	21.3276	29.3196	24.3024	11.7924	26.2781	21.3822	36.7191	18.0159	20.386	11.5995	17.2693	19.9173	17.1004	20.6593	13.0763	22.9423	15.8617
NR3C2	4.52805	6.50632	6.55377	11.3806	6.2225	5.42435	4.84314	4.35554	2.58176	3.93318	2.98354	1.97954	4.73457	6.17338	5.06087	4.30031	4.57673	6.3534	5.02656	2.68835	7.19351	6.21743	5.09012	4.0137	4.04367	5.34769	2.7088	3.55701	8.44893	5.98168	4.46523	6.91275	4.50134	3.26596	8.41647	2.6716	6.08684	5.29263	3.30579	6.60885	5.65697	5.29494	4.36885	6.62463	3.04737	9.64754	5.94981	8.32974	6.78816
NR4A1	9.61118	8.47385	40.2169	29.0726	107.15	37.4767	10.9158	57.1645	10.3342	37.0598	27.5997	6.73344	212.023	46.477	50.0576	31.2649	3.45203	57.2901	10.5407	7.49878	1.32199	37.752	15.3367	21.9286	14.0619	19.528	34.2169	31.1034	22.4401	8.57372	33.8851	11.1318	3.40076	1.95129	18.3608	10.8873	49.5344	34.9693	0.903734	62.9171	164.309	115.746	14.221	20.2774	23.1516	11.7866	14.328	8.55086	22.5513
NR4A3	0.611667	0.218904	4.52902	6.70617	17.2828	5.74118	0.6776	9.80777	0.493273	4.79443	3.33385	0.483854	26.2	1.80427	11.5784	2.62618	0.414442	9.96652	0.35798	0.540411	0.262554	2.82013	1.20744	1.5429	1.48512	0.973052	3.84627	2.29481	4.80845	0.723968	2.49261	1.5556	0.493114	0.360386	2.26672	2.34558	10.4208	2.32706	0.22357	10.7852	25.1765	18.0862	1.53799	2.08502	0.65401	3.22257	0.619509	0.329946	0.591294
NR5A2	2.63538	0.869199	1.01745	1.73998	0.852019	1.09958	0.858427	1.588	0.654881	1.84255	2.16537	0.892852	2.58913	1.40754	0.424819	0.929263	1.95742	0.711904	0.666131	1.06152	1.28154	1.27571	0.637451	1.63935	1.15229	2.52363	2.52119	1.30269	0.939088	1.46161	1.67535	1.08142	1.83706	1.50685	1.62474	1.14906	1.64874	1.68252	1.23746	1.8771	2.57158	1.57256	0.551298	0.812396	2.06557	1.20912	0.718283	0.92198	0.513024
NRP1	28.6761	10.0209	11.0614	12.3524	12.0871	11.4319	7.94318	29.2579	6.4463	21.2639	37.2966	18.7303	17.6708	15.018	9.11222	7.0614	36.0239	7.37827	15.1265	28.3905	16.5623	20.5192	9.32641	50.6226	24.7467	26.6194	33.8474	19.3553	11.0462	13.3147	14.2266	11.2222	33.4678	48.3255	19.6785	9.54696	16.6066	17.7616	26.7353	21.3299	22.5677	12.0098	8.27049	12.4987	26.9262	15.2647	6.35399	12.6774	8.19473
OPRD1	0.132188	0.0300095	0.0354323	0.017248	0.0725455	0.0497315	0.019076	0.0723064	0.370805	0.0585431	0.0715722	0.0961525	0.0413454	0.047373	0.0191614	0.139197	0.0760549	0.0204535	0.040711	0.0416817	0.0262238	0.089397	0.0388483	0.036721	0.0583893	0.0474225	0.0302666	0.0636015	0.0124819	0.0667848	0.0501105	0.0440762	0.0426464	0.0581071	0.0434598	0.0378084	0.0847135	0.0140886	0.0597585	0.0578745	0.026414	0.0362398	0.0163646	0.0408023	0.0418353	0.0236485	0.0374843	0.051322	0.139184
OXTR	55.6596	65.6987	130.155	62.4485	66.9345	83.9998	84.7569	0.0909884	61.9786	70.6076	0.782011	20.149	30.7316	56.8528	0.108427	81.9099	51.8371	72.9968	172.672	0.0586776	147.331	47.6851	35.9571	0.320977	23.6162	20.4651	0.0885865	16.6366	63.257	27.5249	49.9576	131.857	31.3063	0.0429624	119.839	87.5862	19.1912	66.984	22.4094	36.1731	63.2728	93.4318	123.792	231.519	0.0649564	139.785	40.1843	69.0978	21.8616
PPARA	3.06016	3.44741	2.67334	4.04817	3.07344	2.88558	1.87314	5.1958	1.2233	3.44713	3.44622	1.67064	2.41023	4.17394	9.83073	1.86656	4.00679	3.23445	4.07153	3.4181	3.15156	2.62543	3.82988	3.49876	2.78547	6.40474	1.93012	1.7195	1.24291	4.02328	3.26833	3.8853	4.46855	4.35134	3.92522	1.75069	4.07746	3.2927	5.92024	3.024	2.70759	1.57943	2.14166	2.98163	2.10906	2.39784	3.3639	3.67349	2.91722
PRLR	9.29181	10.6927	21.4496	20.229	15.3699	19.406	13.2924	0.628695	7.89447	5.86053	0.608054	1.56445	4.86469	14.4584	0.0154821	20.798	3.27053	12.1466	27.0485	0.084393	8.14907	10.3794	15.4971	0.222524	12.98	1.83027	0.177087	4.86886	8.52361	17.2691	6.43514	24.4193	3.55438	0.122305	6.07029	9.83389	14.197	16.5928	2.69584	12.8052	10.2049	7.00419	5.96751	15.4891	0.484662	19.7859	18.1155	14.1861	17.1205
PTGER3	10.3744	5.01977	4.65568	5.34493	3.73979	4.66263	4.65192	25.7982	1.79273	17.0332	24.3992	5.84778	5.1295	11.3186	0.0902769	3.26534	20.0168	5.66002	8.27652	33.379	4.70258	3.22441	1.70265	17.0736	23.5463	33.9687	13.4663	10.7136	9.13521	5.32783	2.14084	5.49785	15.6744	18.6733	13.7242	4.89552	10.4517	6.80317	24.0792	10.9584	8.02724	4.11354	2.212	5.48432	20.4452	3.69573	1.69144	3.27297	2.2058
PTGER4	7.92565	4.1064	7.14346	6.0469	7.66522	4.79244	2.97484	10.9344	2.864	5.53623	5.7083	6.03416	8.96281	7.94648	3.49297	4.99515	6.80213	4.68074	5.20916	3.24908	4.793	10.4973	3.07454	8.41314	2.88265	6.73832	11.7476	5.57626	10.6854	6.86034	8.38871	5.29534	7.80385	6.35834	5.0159	3.83558	9.52764	9.58601	5.47102	8.50969	13.8916	4.59129	2.3744	4.91448	8.75963	4.26814	2.16174	6.28111	8.7809
PTGFR	4.46686	0.594906	1.22921	1.19673	3.34881	0.701487	1.04373	2.26533	0.441924	1.23309	5.21424	3.41407	3.54331	2.80484	0.630559	0.836544	7.47685	1.1322	1.4432	1.76497	8.70917	5.30141	1.19019	3.98353	1.61193	4.17062	5.54486	3.41447	3.14955	2.75164	3.02335	1.57614	3.59303	2.16943	2.08838	3.70383	7.48033	1.3406	7.34153	4.65332	3.82686	2.93472	0.405513	0.719461	2.88196	2.17995	0.454108	1.70415	0.439426
PTH1R	2.8933	1.23471	1.79538	0.870785	1.65042	1.2962	1.21515	7.4364	1.7126	5.95089	7.5178	7.50778	1.999	2.94813	0.164477	0.352492	5.26525	1.14084	2.11781	9.406	1.47917	1.83475	1.93856	5.46078	3.69305	5.76267	5.59091	5.32932	0.743142	2.21396	1.35094	1.20625	7.04889	5.9347	2.73307	2.30593	2.03796	2.3391	9.37039	3.69702	3.06535	1.31388	0.97728	1.70268	9.04553	0.778393	1.19953	1.15206	0.611336
RARA	9.21675	10.039	15.6042	6.84456	14.2581	16.3747	15.7013	4.49758	26.8954	11.7373	5.23871	13.7043	19.0507	9.49157	4.27189	17.6577	5.9477	12.888	8.58076	3.593	7.66626	12.7443	11.5941	10.0218	15.0448	3.25298	13.1197	12.2846	4.56823	11.4376	11.4259	8.42831	10.9984	4.76599	7.27621	11.9211	12.1172	15.5229	5.45931	13.9972	15.2046	22.2553	16.0572	11.9366	9.58578	16.0223	10.8471	8.08781	13.7311
RARB	5.25013	7.54223	10.2509	8.31855	6.68664	8.07429	3.33192	2.6233	4.44098	2.95962	0.995031	1.70133	3.06696	4.45455	1.23025	6.62963	2.08849	6.04105	13.5836	1.12103	5.83322	5.66219	6.53461	0.758036	2.11549	2.57722	0.741313	1.64678	5.2825	4.87734	4.54894	6.59477	2.41873	1.38486	5.07528	5.4116	4.17253	6.80192	1.84621	3.65727	5.84771	2.87637	9.77769	8.36496	1.62588	8.14246	6.2535	8.70799	7.94202
RXRG	1.93284	0.245191	0.117234	0.215229	0.61069	0.172382	0.403345	5.22396	0.229518	0.786333	2.50154	1.25909	0.413403	0.645879	11.3974	0.147287	0.820832	0.212691	0.506351	3.62353	0.828777	0.442675	0.257074	2.13555	1.23684	1.30755	1.60985	0.971209	0.259591	0.72576	0.203903	0.305558	1.21492	1.89425	1.46424	0.207501	0.390119	0.468812	1.5075	0.531019	0.457788	0.452218	0.0496332	0.186093	2.89117	0.152233	0.187676	0.339112	0.160816
S1PR1	45.8651	15.335	20.5887	17.7453	12.7328	30.7612	17.7162	21.8345	7.54922	50.482	39.1483	25.7089	26.7692	20.7728	8.95221	11.8735	39.1596	9.77643	14.9388	46.752	21.0293	30.2346	7.81291	57.1558	43.1296	39.8218	54.8666	39.644	32.6104	20.0753	26.3136	15.517	53.6	49.1136	30.163	19.1511	22.7806	23.6479	25.1097	33.6061	35.1585	30.9879	10.4698	20.7871	78.6103	40.7973	8.71322	12.7329	8.94916
SDC1	20.0007	23.2798	53.2404	21.0771	48.7878	51.1379	110.435	1.49997	90.1291	29.7955	3.18865	29.0156	38.0833	23.5327	0.0531297	77.406	7.11272	31.1563	32.2208	0.108349	27.7722	30.9866	42.6978	0.360605	26.4715	5.4856	2.09442	36.828	22.5314	30.146	62.0827	23.6903	19.4519	0.381212	20.9675	54.251	61.7558	41.3249	6.48972	23.3361	20.7301	79.5782	75.634	33.008	0.475775	65.1261	38.2662	38.8636	50.0024
SSTR1	0.63473	0.499034	0.67982	0.626718	1.06544	0.520217	0.244881	0.832888	0.696338	0.260062	0.523412	0.274294	1.10026	0.621877	0.250147	0.529213	1.07937	0.759966	0.995203	0.660227	0.906205	0.81138	0.261261	1.20733	0.357601	0.647227	0.86291	0.403929	0.682827	0.655856	0.355531	0.933185	0.701721	0.596021	0.601397	0.147388	0.645115	0.962529	1.00045	0.737017	0.953066	0.33117	0.311551	0.467248	2.85021	0.349152	0.258266	0.523433	0.31966
SSTR2	0.703429	0.354605	0.55012	0.197065	0.474867	0.418866	1.50976	0.519705	0.123462	0.975444	0.222417	0.361106	0.872476	0.285662	0.0912194	0.687071	0.576012	0.279004	0.664075	2.43472	0.189096	0.817723	0.378286	0.648265	0.6769	0.315548	1.20859	0.740582	0.269516	1.06336	0.503039	0.345006	0.634442	0.587824	0.38896	0.721832	0.757599	0.714294	0.918649	0.935943	0.636589	0.618923	0.299446	0.42171	0.510348	0.520684	0.23545	0.452378	0.260744
TACR1	7.9527	3.687	1.31566	3.5589	2.16212	3.42811	3.15692	1.69233	2.90272	3.52149	5.16626	2.54298	5.45089	2.49652	0.159677	0.887388	5.23117	1.16338	1.36602	2.13691	3.01452	3.96168	0.764772	4.78763	1.96076	2.76654	4.6322	4.07342	3.5882	3.59089	5.7421	2.44733	5.14306	1.70014	5.07435	3.81908	6.03388	4.59861	5.22533	6.45509	6.52983	3.7707	2.05996	2.04539	6.12702	2.76571	0.883572	3.20195	1.2479
TEK	13.2739	5.39866	5.13696	6.93707	4.65597	6.60302	4.16632	14.0074	1.76426	11.9835	14.318	6.22925	9.96471	8.23058	3.95766	2.43076	18.9029	2.90693	5.6914	10.7135	8.97024	10.3424	2.43146	16.898	10.6745	13.0044	19.959	9.01304	6.30466	8.86386	5.85591	5.74005	18.4777	21.4019	9.15551	4.37513	8.49666	9.59008	12.7521	9.96131	12.0509	6.77322	3.22245	5.14968	19.1662	6.89891	3.73416	4.8472	2.69189
TGFBR2	156.322	55.3544	56.04	88.3524	72.2039	78.0268	44.5663	115.099	35.7974	147.873	168.703	80.9786	137.336	98.0485	16.3025	48.9487	175.558	53.9202	71.5711	121.492	143.584	102.504	43.4362	197.023	132.683	109.078	158.603	81.0458	107.564	89.1397	76.0301	72.5183	154.641	157.993	101.419	69.3363	101.673	87.2906	150.638	113.54	146.285	90.018	50.0532	63.4216	121.315	98.8363	42.5328	54.5341	42.3104
TGFBR3	37.8221	30.6211	39.2821	53.7634	26.6569	25.737	18.2914	33.3457	10.4327	38.6118	43.1488	17.9262	42.3997	47.0671	4.13324	18.3722	58.6148	36.8089	59.9286	34.6908	49.3865	23.6469	30.6338	64.6698	35.8797	41.9467	26.101	24.3529	44.8981	27.2227	12.3003	27.1453	37.2221	33.41	37.5442	14.3699	35.8324	32.1212	48.8696	32.8354	41.0099	29.7617	26.2286	35.7748	21.9784	33.7576	17.8532	37.4286	20.0026
THRB	9.78703	8.21126	10.1876	11.3248	9.57195	7.24304	5.27693	10.6142	3.75148	8.99088	9.15614	3.74408	8.47537	13.7417	5.81595	7.92564	9.34608	9.96573	11.6379	6.97899	11.7074	8.41404	5.70709	9.39536	8.62528	12.2195	5.10447	5.43756	10.1484	9.73053	4.76214	11.1525	7.17873	12.1272	14.5851	6.02287	9.81071	8.93443	9.62017	8.4092	9.32957	6.41818	9.3571	8.84166	5.54959	11.3954	6.6902	12.4768	10.5706
TIE1	10.1241	7.03221	6.07737	3.04114	6.06206	6.19498	6.14101	9.13225	6.30428	13.9618	9.89175	12.2151	14.301	7.49298	4.69193	3.01916	9.63293	3.57141	6.59269	7.72514	6.37214	12.5407	5.22117	14.4848	8.49547	7.93232	14.2684	12.7617	2.72577	9.18726	5.88235	5.49051	12.882	12.0906	6.63013	6.72524	5.96042	12.1077	10.6783	9.08936	14.968	8.02131	4.02935	5.86699	22.5619	5.22799	5.95969	5.61085	3.38595
TNFRSF10D	3.40722	3.45368	2.47158	3.62183	4.96833	3.08689	1.4763	4.47878	2.4602	3.67893	4.21676	1.8568	6.8842	4.18342	0.590468	1.93121	3.10916	5.79308	1.82802	2.69072	3.36957	4.4864	0.858199	1.8644	3.0845	2.72152	3.91449	3.71399	4.44135	2.9988	2.82555	2.61496	4.03051	2.70782	4.32534	2.88774	5.97108	3.59473	2.01687	4.28023	6.79657	5.59011	3.11754	2.29725	4.15068	2.08806	1.69964	2.78317	2.87978
TNFRSF18	0.580388	1.35979	0.681125	0.105886	1.36082	0.691501	2.40723	0.0967087	1.56577	0.56572	0.474645	2.11337	0.954542	1.02327	0.0174271	1.32928	0.318344	0.686853	0.506387	0.193336	0.284099	1.23701	0.770881	0.431383	1.71114	0.323477	0.647837	2.14573	0.158119	0.578672	3.87882	0.682247	0.772699	0.377484	0.320162	1.90199	0.305433	0.922567	0.260426	1.10304	0.720698	1.37195	1.28369	0.922849	0.927439	0.725896	0.994336	1.14869	1.35378
TNFRSF4	1.10554	0.500492	0.489737	0.252873	0.80191	0.342745	0.64221	0.869929	1.41422	1.39076	0.723294	1.82157	1.39884	0.874598	0.707515	0.246642	0.394205	0.674917	0.754204	0.651833	0.469065	1.51175	1.99439	1.65054	0.516679	0.795919	1.51313	1.38142	0.348564	0.63707	3.05224	0.359	1.04206	1.11935	0.490851	0.795533	0.302281	1.40762	0.594894	1.02596	1.44623	0.718252	0.477619	0.629685	2.49882	0.348544	1.323	0.618316	0.671795
TNFRSF8	1.07117	0.894926	0.998546	0.271656	0.317387	0.750754	0.724888	0.65572	0.711813	0.615922	1.2873	1.63459	0.791127	0.50926	0.127743	0.282057	1.27478	0.322537	0.419083	0.525189	0.528333	1.11746	1.66871	1.22914	0.713647	0.689781	2.61963	1.4783	0.401203	0.947622	1.32357	0.436524	2.06569	1.12756	0.660589	0.775859	0.387262	0.91576	1.02087	1.14472	1.09508	0.298978	0.562532	0.703303	3.22263	0.413848	0.369636	0.533268	0.521942
TNFRSF9	0.21306	0.0253121	0.0451686	0.0687401	0.164448	0.0225868	0.0534992	0.0272055	0.0228056	0.0144023	0.0498882	0.0441553	0.11971	0.0279704	0.0320548	0.0713719	0.0688882	0.0441251	0.0176742	0.019688	0.0751394	0.180969	0.130324	0.0481803	0.0383052	0.0222724	0.295783	0.284178	0.0447443	0.0692717	2.1193	0.0450413	0.060982	0.0285901	0.0359239	0.0209279	0.14112	0.0998197	0.0465541	0.0376883	0.0357399	0.10966	0.0845434	0.0538874	0.0192975	0.0274268	0.0184431	0.0378775	0.197837
TUBB3	0.0576925	0.0135652	0.0339744	0.00727688	0.0874477	0.104908	0.14889	0.0119631	0.749614	0.0102913	0.00419389	0.0676106	0.147598	0	0.00808414	0.203998	0.0182314	0.0165947	0.0151551	0.00703414	0	0.156253	0.134099	0.0430346	0.0501808	0	0.281807	0.06527	0	0.0685368	0.23899	0.0107282	0.0843392	0.0262663	0.0146684	0.112988	0.102115	0.101047	0.0210099	0.0861778	0.0928665	0.0917366	0.00431509	0.0181204	0.0441254	0.0463227	0.00439291	0.00338321	0.0543717
ICAM2	8.54641	4.02109	3.04447	3.40457	3.33728	3.89682	3.54002	5.48675	3.38361	7.88659	6.91483	8.94635	7.84494	3.99063	2.11659	1.65088	7.17248	2.80639	3.23644	6.36581	4.36951	5.71149	3.09375	9.61741	5.42775	5.26111	13.347	7.1972	2.89797	3.62007	5.4934	3.13128	10.9333	8.61524	4.59356	3.98115	3.4559	4.48198	5.68259	5.93017	7.76368	5.53992	2.30475	2.6176	21.0439	4.20554	4.17655	2.55109	2.56241
PAK1	8.84521	9.70879	10.7761	9.542	8.7331	9.29062	9.10994	6.35637	9.59426	6.03264	5.82233	8.97103	8.14861	7.752	10.4954	11.7427	6.25195	8.99356	8.06129	4.58588	9.61407	10.379	10.5418	5.86548	12.8333	4.75213	5.5927	6.5132	7.47058	10.5346	12.0822	11.2496	6.87654	4.65717	7.80671	10.461	8.70054	9.10466	4.91794	8.81589	5.88132	7.39527	9.06782	10.1313	4.20494	9.5479	10.773	10.0243	12.137
FCGR3A	34.1844	10.9016	5.94091	11.3158	5.99633	5.65442	7.53747	1.41085	5.9882	9.57509	6.5732	47.4778	13.7883	5.13387	0.583836	4.95365	12.6064	7.31323	2.51502	1.6375	10.3153	30.6745	6.50222	27.9253	7.03782	2.08215	14.08	14.4423	13.6404	17.0432	6.85732	8.00069	13.9185	9.02283	10.6893	38.5581	12.4312	8.5854	6.18771	15.8408	11.0163	16.704	10.1646	6.06991	2.15274	6.4116	5.35959	10.8651	13.0835
SHC3	1.16404	1.05916	0.368346	0.29545	0.736433	0.480666	0.576323	0.924728	0.369768	0.360444	1.11335	1.06787	0.912971	0.57814	0.13105	0.270294	2.6355	0.962526	0.383164	0.874046	3.63252	0.882257	0.884167	0.387853	0.673707	0.762822	0.97836	0.710238	0.203068	0.490961	0.592614	0.43558	1.28818	0.755235	0.652822	0.582697	0.979551	0.490618	1.81542	0.676075	0.507567	0.982317	0.236807	0.5821	1.60944	0.346582	0.864349	0.721532	0.587065
PRKCA	2.07787	1.10647	3.35374	1.30802	2.97874	2.24234	0.88717	1.06568	1.94941	1.87644	1.04956	1.24798	2.95157	2.17936	1.92144	1.23641	1.94815	1.89851	3.3412	0.90533	4.60822	2.13605	2.08638	1.80523	1.83753	1.92551	1.13431	1.51101	3.04518	1.7757	4.75957	2.98174	2.76733	1.37496	2.64685	2.00786	2.7685	3.03881	2.15047	2.3307	2.90141	3.48621	1.61299	1.85351	0.790964	2.81255	1.91255	1.84389	1.66092
CD3D	7.85594	4.72213	2.62455	8.57097	5.2125	2.1742	3.9913	0.656037	5.6172	1.76669	1.43992	5.56687	4.75087	4.22527	0.359798	1.19386	2.13867	3.27611	1.44536	0.368971	2.74653	5.26711	1.98944	1.1492	1.54451	1.08416	2.48816	4.72054	2.42147	9.91361	32.151	5.14993	3.79387	1.16902	2.34324	5.45128	3.49382	3.99651	1.03527	2.14034	3.94128	2.71585	6.19362	3.78036	1.68332	1.76714	2.40901	3.17822	4.82252
PAK3	2.17278	2.86134	3.60504	2.46182	3.12277	2.27767	1.33803	0.285231	0.81808	1.53191	0.232417	0.803586	3.33611	3.00371	0.0648278	1.82046	1.43015	2.82595	3.39201	0.191887	3.18587	1.62259	2.44197	0.458491	0.78195	0.789185	0.308333	0.769536	1.87284	2.26549	1.64863	2.3213	1.31642	0.347293	3.98255	1.38336	2.34696	2.46412	0.723567	1.78784	2.11644	1.91137	2.29494	2.74791	0.182453	2.76152	1.79282	2.91119	1.9317
PAK4	4.28857	9.84252	9.2652	2.87025	8.99403	9.62945	13.4595	1.40964	17.3212	5.35359	1.61897	6.10396	8.42128	5.83423	1.07379	13.1249	2.03417	6.71397	8.5616	1.3358	3.66716	7.22947	10.4414	2.40615	4.97348	1.7072	1.87112	8.22262	2.06096	8.27144	5.86909	6.05403	3.34676	1.43916	3.8838	11.2973	3.96579	8.97828	1.77471	8.09769	5.87754	10.3954	10.2309	10.0271	3.79481	8.20883	13.3557	10.5429	16.473
ICOS	0.896482	0.227198	0.142256	0.64595	0.302079	0.1284	0.148274	0.185337	0.148164	0.0948005	0.133459	0.211378	0.651726	0.301271	0.0361061	0.0828286	0.140461	0.244586	0.101531	0.0176718	0.114451	0.397065	0.112299	0.158569	0.015281	0.0990053	0.140121	0.145757	0.251997	0.77164	4.4415	0.425249	0.244844	0.0488803	0.122838	0.239331	0.581497	0.368344	0.0703773	0.0841957	0.941006	0.10243	0.231269	0.257967	0.0461899	0.077584	0.103005	0.249322	0.327833
CTLA4	1.05821	0.160629	0.212981	1.034	0.376886	0.674515	0.252262	0.0812444	0.379441	0.752672	0.1928	0.273143	1.55614	0.535974	0.00563093	0.167928	0.12191	0.450798	0.643926	0.102891	0.0951959	0.416582	0.233514	0.143882	0.524295	0.285053	0.25763	0.356129	0.180781	0.700167	10.1416	0.934081	0.323101	0.0914776	0.21456	0.798579	1.28029	0.360197	0.219514	0.360158	0.184353	0.239619	0.144271	0.397579	0.0922055	0.126581	0.587489	0.289855	0.124978
CBLC	3.55194	9.31159	7.73026	3.85859	7.8049	6.95062	7.54155	0.151035	13.2717	3.63799	0.164728	4.23633	5.11976	4.19617	0	7.18016	0.777473	6.67639	5.86759	0	2.92142	5.24544	10.0327	0	3.40446	0.574078	0.00617679	5.32065	1.77292	7.59526	2.50149	6.45118	2.75268	0	3.79639	10.004	4.08967	7.87113	0.893997	7.79734	3.53037	7.3137	8.28072	6.825	0	7.40782	10.2911	7.55551	10.556
RASGRP1	2.13785	2.08954	1.31326	2.3687	1.49315	1.38963	0.982403	0.225997	0.612319	0.437435	0.234636	0.4978	1.23817	0.847112	0.0998551	2.57143	0.733867	1.8231	0.58728	0.0919964	0.983565	1.40936	2.16522	0.418996	2.78427	0.412985	0.33113	0.503225	0.617665	1.84252	6.90246	1.93835	1.04788	0.277789	1.0578	1.23143	1.80666	1.7016	0.435068	1.53408	1.1066	0.683209	1.4485	1.68196	0.0881676	0.719752	1.55442	1.32497	1.21283
TRAV2	0.652817	0.805858	0.0864981	1.25056	0.13915	0	0.358579	0.0761442	0.237081	0	0.106775	0.229513	0.128108	0.89049	0.0686067	0.550852	0.41775	0.168999	0.128615	0	0.124271	0.274356	0.0948372	0.21913	0.0580724	0.115769	0.0280263	0.78472	0	0.823995	2.57427	0.136569	0.214726	0.0371518	0.0466818	0.211518	0.487468	0.226997	0.133727	0.0914194	0.236436	0.0486582	0.769029	0	0.0702139	0.0907204	0.167764	0.172272	0.138429
TRAV9-2	1.22527	0.50841	0.305597	0.531821	0.491616	0.0907343	0.36196	0	0.0523503	0	0.330083	0.101359	0.301735	0.337082	0	0.173764	0.081995	0.186586	0.170399	0.0395447	0.146349	0.48465	0.0837649	0	0.0512924	0.102253	0.346559	0.448478	0.296048	1.19872	4.03068	0.603122	0.252875	0.0328143	0.0412317	0.112094	0.430556	0.668315	0.157486	0.282611	0.469872	0	0.291105	1.3243	0	0.0400644	0.148177	0.418436	0.550203
TRAV12-3	1.06758	1.50612	0.150884	0.323174	0.424773	0.179195	0.044678	0.0332057	0.206777	0.0571308	0	0.250221	0.297954	0.628731	0	0.137269	0.283386	0.294796	0.224351	0	0.28903	0.897331	0.16543	0.0477803	0	0.100971	0.268884	0.603898	0.0417627	1.26825	1.99008	0.317634	0.530625	0.0324031	0.122145	0.221378	0.340128	0.32997	0.116634	0.518273	0.41243	0.933651	1.14983	0.352075	0.183718	0.0791246	0.14632	0.075126	0.664043
TRAV18	0.22589	0.0455258	0.273648	0.183162	0.110055	0.121873	0.162059	0.0301116	0.0468773	0	0.126675	0.0907621	0.0337738	0	0.0271309	0.280076	0	0.0334158	0	0	0.0655245	0.108495	0	0	0.0918599	0	0.155164	0.146033	0.113613	0.191678	0.740367	0.216028	0.0566095	0	0.0738422	0.267666	0.0514057	0.179534	0.0352553	0.0723045	0.14025	0.0384842	0	0.0912195	0	0.0717516	0.0884572	0.204377	0.109485
TRAV26-1	0.449496	0.111907	0.280273	0.300154	0	0.0332861	0.066393	0	0.115229	0.254695	0	0.0371837	0.110693	0.247319	0	0.101993	0.210561	0.164279	0	0.0290142	0.161066	0.311142	0.122917	0	0	0.112535	0.23611	0.209396	0.0620607	0.188466	1.63032	0.324511	0.139152	0.0481521	0.211763	0.0822438	0.189541	0.196139	0.115548	0.118488	0.191526	0.094598	0.14239	0.186856	0.0455018	0.0587909	0.0362394	0.11164	0.493395
TRAV26-2	0.607899	0.122516	0.092053	0.591497	0.074043	0	0.163546	0.0405171	0	0.0697101	0.454531	0	0.18178	0.090255	0	0.12562	0.296386	0.0449631	0	0	0.0881675	0.510957	0	0	0.123604	0.0616017	0.149131	0.147373	0	0.154749	1.80564	0.193786	0	0	0.546477	0.135061	0.0691698	0.16105	0	0	0	0	0.993791	0.184113	0	0.0482733	0.0595125	0.412504	0.515617
TRAV30	0.126399	0.0594402	0.223304	0.717431	0	0.0530405	0.105795	0.0393148	0.0612048	0.135283	0.110261	0	0.0440964	0.0437884	0	0	0.0479318	0	0	0	0.0427756	0.212484	0.0979328	0.169712	0	0.0597738	0	0.0953334	0	0.0500524	0.543741	0.0940179	0	0.0383645	0.0964111	0	0.0671173	0	0.0460306	0.236009	0.122077	0	0.510513	0.1191	0	0	0.115493	0.222368	0.0714738
TRAV39	0.943725	0.302588	0.0909405	0.194783	0.512038	0.27001	0	0.0400275	0	0	0.112259	0.12065	0.179583	0.267493	0	0.124102	0.0488007	0.133259	0	0	0.043551	0.0721118	0	0	0	0	0.235726	0.0485307	0	0.101919	0.984174	0.0478611	0	0	0.0490794	0	0	0.159103	0	0.0480573	0.372869	0.153472	0.115504	0.303146	0	0	0	0.226399	0.145539
TRAV41	0.422583	0.0596171	0.179174	0.815508	0.14412	0.106397	0.159165	0.0394318	0.061387	0.135686	0.276472	0.594276	0.265366	0.219594	0	0	0	0.481347	0	0	0.171612	0.355194	0.0982243	0.340435	0.120293	0	0.116109	0.0956171	0.0991863	0.552215	1.51489	0.377191	0.370657	0	0.0966981	0.175258	0.201951	0.156736	0.0461676	0.0473422	0	0.453564	0.341355	0	0	0	0.0579184	0.178424	0.0716865
TRBC2	11.6125	8.17926	3.31332	11.6853	6.22095	2.32866	5.18238	1.2466	6.94169	2.59849	2.61091	7.61132	4.831	5.9098	0.475199	1.76732	2.90326	5.30299	2.64553	0.620218	3.42561	5.80169	2.90621	1.73626	2.68156	1.88316	4.38833	9.26229	6.3216	11.3841	43.7165	6.25846	6.20451	1.41921	3.32156	6.70376	4.95206	6.30498	1.54375	2.63837	5.60773	4.39156	7.37886	4.41793	2.38744	3.1228	3.14562	6.20115	10.4308
TRBJ2-7	0	0.426199	0	0.685884	1.54545	0	0.379287	0.281896	0.438851	0	0	0	0	0.627944	0.253991	0.582664	0.343681	0.312829	0	0.331503	0	0	0.702199	0.405624	0	0	0.415028	2.73424	0	0	6.06471	0.337064	0.264981	0	0.691288	0.313226	0.240622	0.560247	0	0	0	0.720555	0	2.13492	0	0.335859	0	0	2.56241
TRBV5-6	0.443712	0.625979	0.117583	0.335798	0.56747	0.0465486	0.882041	0	0	0.0593625	0.193531	0.259996	0	0.269002	0	0.0713156	0.126195	0.191445	0.233115	0	0.11262	0.621589	0.257839	0.0496467	0.0526281	0.209831	0.0761965	0.125498	0	0.0878524	2.12084	0.742595	0.0324325	0.0336688	0.0423054	0.15335	0.117805	0.617147	0.0807933	0.0828489	0.107135	0.176386	0.54759	0.365828	0.127263	0.123323	0.101357	0.0390303	0.376354
TRBV6-1	0.424901	1.29879	0.112599	1.00488	0.362275	0.267451	0.444551	0.0330401	0.257182	0.0568459	0	0.0497947	0.889405	0.331197	0.059539	0.170731	0.161127	0.219994	0.502273	0.0388544	0.323537	0.357142	0	0	0.050397	0.200935	0.243221	0.280413	0.0415544	1.00954	4.92501	0.790126	0.465864	0.0967244	0	0	0.282026	0.262659	0.0773682	0.23801	0.30778	0.591178	0.429034	0.500456	0	0	0.339711	0.560635	0.720798
TRBV6-6	0.622111	0.309763	0.0775807	0.623129	0.374413	0.138206	0.321612	0.0341471	0.159479	0	0	0.0514631	0.191501	0.114098	0.0307669	0.141161	0.083263	0.151577	0.28839	0.0401562	0.111459	0.184554	0	0.0491349	0.104171	0	0.226233	0.496815	0.12884	0.0869467	1.83661	0.16332	0.0962945	0.0666435	0	0.151769	0.204033	0.339325	0.199901	0.16399	0.318092	0	0	0.155167	0	0.122052	0.300937	0	0.310395
TRBV7-3	0.178826	0.706395	0.227466	0.162401	0.182963	0.0450243	0.538837	0	0.467592	0.114837	0.140395	0.100593	0.0748638	0.223023	0.0300695	0.103471	0.162751	0.0740703	0.0563704	0	0.108932	0.120247	0.0831319	0.096042	0	0.20296	0.122836	0.323701	0	0.509854	2.30782	0.27933	0.156853	0.0325663	0.16368	0.111247	0.199408	0.132653	0	0.040068	0.15544	0.0426525	0.722262	0.15165	0	0.23857	0.245095	0.415274	0.121343
TRBV12-3	0.173579	0.391811	0.0367987	0.472908	0.414388	0	0.261514	0	0.100861	0	0.181701	0	0.39967	0.1804	0	0	0.0394939	0.179743	0.0547165	0	0.211473	0.0583594	0	0.139836	0	0.0492513	0.071539	0.392755	0	0.453653	1.94143	0	0.213151	0	0.0397195	0.107983	0.165906	0.193141	0.0758549	0.0777847	0	0.0414011	0.420643	0.0981335	0.238968	0.115785	0.190324	0.0732891	0
TRBV18	0.497621	0.234011	0.246156	0.0753191	0.452562	0.0835264	0.541459	0.0309558	0.0963833	0.0532598	0.0868175	0.13996	0.208324	0.551652	0.0278915	0.0639841	0.113222	0.446585	0.20915	0.0728066	0.808339	1.39422	0.231332	0.0445429	0.0944355	0.0470649	0.182302	0.450383	0.038933	0.748798	2.99693	0.222084	0.203688	0.0604151	0.113869	0.275171	0.184965	0.307612	0.217463	0.0371658	0.913151	0.197816	0.491296	0.234443	0.0570898	0.0737634	0.181875	0	0.393941
TRBV20-1	1.61584	1.94008	0.983942	1.60012	1.407	0.34624	1.12225	0.128321	0.699187	0.717525	0.359883	0.966957	1.40329	1.96518	0.0867136	0.397848	0.469337	1.10361	0.541866	0.075451	0.488657	1.15588	0.559379	0.646249	0.244663	0.195097	0.802923	2.83934	0.322776	4.90102	7.83839	1.34254	2.20133	0.219133	0.432683	0.962431	1.20486	1.65768	0.638522	0.462188	1.5938	0.738002	1.94399	0.728873	0.236653	0.64976	0.659681	0.653214	1.22474
TRBV28	6.09853	4.04769	1.59842	4.09016	4.18705	1.15916	2.81471	0.684868	2.50071	0.899811	1.16992	4.01605	2.76539	2.56578	0.258049	0.75927	1.12342	2.18333	0.799252	0.322156	1.40902	4.23989	1.08564	0.573364	0.778737	0.833013	2.69495	4.28767	2.44312	6.38879	22.9816	4.28806	3.2891	0.668314	1.64896	3.6389	2.26398	3.21721	1.04971	1.34552	3.24788	1.71877	4.99456	1.82953	1.49271	1.37973	1.6461	3.19755	2.94292
TRDV1	0.350107	0.219522	0	0.529916	0.464341	0	0	0.217793	0.113019	0	0.254506	0.164118	0.488564	0.161717	0	0.0750279	0.309784	0.040282	0.0613125	0	0.0789884	0.392367	0	0.0522311	0.166103	0.275942	0.0534419	0.26406	0.502182	0.554553	1.1714	0.520833	0.204725	0.24795	0	0.0403332	0.154921	0.288566	0.127498	0.392227	0.56356	0.463919	0	0.164945	0.267775	0.0864951	0.213267	0.287434	0.395945
TRAV6	0.210873	0.59499	0.0372541	0.398967	0.239723	0.176977	0.1765	0	0	0.112848	0.137962	0.1977	0	0.182632	0	0	0.0399827	0.145574	0.110787	0.0385659	0.0713633	0.118163	0.245074	0.188756	0	0.0498608	0.410405	0.198808	0	0.417516	1.25991	0.352916	0.0924809	0	0	0.0364397	0.0279932	0.130355	0.0383968	0.157495	0.152747	0	0.425849	0.198696	0	0	0	0	0.119241
[truncated: 1,173 more columns]
