# Supplementary material for: Identification and Validation of an Immunological Expression-Based Prognostic Signature in Breast Cancer
Source: Front Genet. 2020 Sep 16;11:912. doi: 10.3389/fgene.2020.00912 (PMC7526716; doi:10.3389/fgene.2020.00912)
Supplement: Supplementary file 11 [file Data_Sheet_6.XLSX]

## Sheet: corResult
TF	immuneGene	cor	pvalue	Regulation
BATF	PSME2	0.427762	5.12359e-24	postive
EGR1	TSLP	0.453066	4.42526e-27	postive
EGR2	TSLP	0.512353	2.40267e-35	postive
EOMES	LTA	0.827884	3.68842e-129	postive
EOMES	CXCL9	0.732816	1.17857e-86	postive
EOMES	PDCD1	0.799983	2.50682e-114	postive
EOMES	CXCR3	0.837529	6.36832e-135	postive
EOMES	IL2RG	0.790551	7.75494e-110	postive
EOMES	TNFRSF8	0.485711	1.97392e-31	postive
EOMES	CD3D	0.794023	1.83584e-111	postive
EOMES	TRBC2	0.789154	3.42784e-109	postive
EOMES	TRBJ2-7	0.827575	5.56771e-129	postive
EOMES	TRBV5-6	0.805991	2.57445e-117	postive
EOMES	TRBV12-3	0.810808	8.67405e-120	postive
EOMES	TRBV28	0.75975	1.18898e-96	postive
EOMES	TRDV1	0.566909	1.56651e-44	postive
ERG	FGF7	0.484784	2.66358e-31	postive
ERG	OGN	0.426232	7.70288e-24	postive
ESR1	BMPR1B	0.465605	1.07169e-28	postive
FLI1	LTA	0.679007	6.2887e-70	postive
FLI1	CD209	0.485987	1.80552e-31	postive
FLI1	CXCL9	0.559082	4.15693e-43	postive
FLI1	PDCD1	0.589128	8.68527e-49	postive
FLI1	CXCR3	0.660458	5.78622e-65	postive
FLI1	FGF7	0.474702	6.53402e-30	postive
FLI1	IL2RG	0.654367	2.07132e-63	postive
FLI1	TNFRSF8	0.489397	5.9435e-32	postive
FLI1	CD3D	0.668591	4.26621e-67	postive
FLI1	TRBC2	0.677434	1.71178e-69	postive
FLI1	TRBJ2-7	0.683708	3.03192e-71	postive
FLI1	TRBV5-6	0.704785	1.81201e-77	postive
FLI1	TRBV12-3	0.716829	2.80322e-81	postive
FLI1	TRBV28	0.668312	5.06336e-67	postive
FLI1	TRDV1	0.409951	5.20132e-22	postive
FOXA1	BMPR1B	0.50104	1.21666e-33	postive
FOXO1	FGF7	0.415529	1.26047e-22	postive
FOXO1	OGN	0.432377	1.47862e-24	postive
FOXP3	LTA	0.851722	3.96412e-144	postive
FOXP3	PSME2	0.408492	7.50201e-22	postive
FOXP3	CXCL9	0.748676	2.18394e-92	postive
FOXP3	PDCD1	0.702316	1.0367e-76	postive
FOXP3	CXCR3	0.832733	5.19895e-132	postive
FOXP3	IL2RG	0.794528	1.05859e-111	postive
FOXP3	TNFRSF8	0.553246	4.52746e-42	postive
FOXP3	CD3D	0.794216	1.48804e-111	postive
FOXP3	TRBC2	0.805589	4.11258e-117	postive
FOXP3	TRBJ2-7	0.638512	1.57347e-59	postive
FOXP3	TRBV5-6	0.707051	3.59811e-78	postive
FOXP3	TRBV12-3	0.699891	5.64657e-76	postive
FOXP3	TRBV28	0.795558	3.43095e-112	postive
FOXP3	TRDV1	0.437306	3.83853e-25	postive
GATA3	BMPR1B	0.434058	9.35812e-25	postive
MAF	CD209	0.501735	9.59826e-34	postive
MEF2C	LTA	0.41031	4.75149e-22	postive
MEF2C	FGF7	0.563859	5.67969e-44	postive
MEF2C	TRBC2	0.403201	2.79033e-21	postive
MEF2C	TRBJ2-7	0.438799	2.54003e-25	postive
MEF2C	TRBV5-6	0.45844	9.1549e-28	postive
MEF2C	TRBV12-3	0.463318	2.13698e-28	postive
SPIB	LTA	0.435801	5.80721e-25	postive
SPIB	PDCD1	0.501952	8.91475e-34	postive
SPIB	CXCR3	0.406609	1.20072e-21	postive
SPIB	IL2RG	0.60509	4.69661e-52	postive
STAT1	HLA-G	0.403989	2.29783e-21	postive
STAT1	LTA	0.492274	2.30556e-32	postive
STAT1	PSME2	0.445299	4.11034e-26	postive
STAT1	CXCL9	0.574461	6.09128e-46	postive
STAT1	PDCD1	0.463444	2.05741e-28	postive
STAT1	IFITM1	0.48334	4.23944e-31	postive
STAT1	CXCR3	0.474086	7.91726e-30	postive
STAT1	IL2RG	0.515483	7.90239e-36	postive
STAT1	TRBV12-3	0.407962	8.5674e-22	postive
TCF7L2	TCF7L2	0.988587	0	postive
TCF7L2	TSLP	0.408836	6.88291e-22	postive
TEAD1	PSME2	-0.410173	4.91794e-22	negative
TP63	TSLP	0.590532	4.55685e-49	postive
